# Supplementary material for: Nickel-catalyzed reductive monofluoroakylation of alkyl tosylate with bromofluoromethane to primary alkyl fluoride
Source: Royal Society of Chemistry journal article supplement (doi:10.1039/d1cc02837e), 2021-01-01

---

## Supporting Information For

### Nickel-Catalyzed Reductive Monofluoroalkylation of Alkyl Tosylate with Bromofluoromethane to Primary Alkyl Fluoride

Ru Cui,<sup>‡</sup> Jie Sheng,<sup>‡</sup> Bing-Bing Wu, Duo-Duo Hu, Hong-Qian Zheng and Xi-Sheng Wang\*

Hefei National Laboratory for Physical Sciences at the Microscale and Department of Chemistry,  
University of Science and Technology of China, Hefei, Anhui 230026, China.

#### Table of Contents

|                                                                                                               |    |
|---------------------------------------------------------------------------------------------------------------|----|
| General Information: .....                                                                                    | 3  |
| Figure S1 Mechanistic study experiments and proposed mechanism.....                                           | 4  |
| Tables of the Optimization of Monofluoromethylation Reaction Conditions .....                                 | 5  |
| Table S1. Ligands Screening.....                                                                              | 5  |
| Table S2 Reductants Screening.....                                                                            | 6  |
| Table S3. Base Screening.....                                                                                 | 6  |
| Table S4. Catalysts Screening.....                                                                            | 7  |
| Table S5 Additive screening .....                                                                             | 7  |
| Table S6 Temperature Screening .....                                                                          | 8  |
| Table S7 Optimization the amount of reagents .....                                                            | 8  |
| Table S8 Solvent Screening .....                                                                              | 9  |
| Table S9. Optimization the amount of bromofluoromethane .....                                                 | 9  |
| Preparation of Substrates.....                                                                                | 10 |
| Preparation of Bioactive Molecule Alkyl tosylates.....                                                        | 10 |
| Preparation of BrCFH <sub>2</sub> Stock Solution .....                                                        | 13 |
| General Procedure for Nickel-catalyzed Cross-Coupling between Alkyl tosylates and<br>Bromofluoromethane ..... | 13 |
| Mechanistic Studies.....                                                                                      | 29 |
| In-situ generation of 1a .....                                                                                | 29 |
| In-situ Suzuki process .....                                                                                  | 30 |
| Radical Trapping Experiment with TEMPO.....                                                                   | 31 |

---

|                                                                                              |    |
|----------------------------------------------------------------------------------------------|----|
| Radical Clock Experiment: .....                                                              | 31 |
| Large scale reaction.....                                                                    | 32 |
| Monofluoroalkylation of alkyl tosylate:.....                                                 | 32 |
| References: .....                                                                            | 33 |
| NMR Spectra of Substrates ( $^1\text{H}$ NMR, $^{19}\text{F}$ NMR, $^{13}\text{C}$ NMR)..... | 34 |

---

## General Information:

$^1\text{H}$  NMR,  $^{13}\text{C}$  NMR and  $^{19}\text{F}$  NMR spectra were recorded on Bruker 400 MHz spectrometer (400 MHz for  $^1\text{H}$ ; 101 MHz for  $^{13}\text{C}$  and 376 MHz for  $^{19}\text{F}$ ) or Bruker 500 MHz spectrometer (500 MHz for  $^1\text{H}$ ; 126 MHz for  $^{13}\text{C}$  and 470 MHz for  $^{19}\text{F}$ ) in  $\text{CDCl}_3$  unless otherwise noted. Signal positions were recorded in ppm with the abbreviations s, d, t, dd, dt, tt and m denoting singlet, doublet, triplet, doublet of doublets, doublet of triplets, triplets of triplets and multiplet respectively. All NMR chemical shifts were referenced to residual solvent peaks or to  $\text{Si}(\text{CH}_3)_4$  as an internal standard. For  $^1\text{H}$  NMR:  $\text{CDCl}_3 = \delta$  7.26 ppm,  $\text{Si}(\text{CH}_3)_4 = \delta$  0 ppm. For  $^{13}\text{C}$  NMR:  $\text{CDCl}_3 = \delta$  77.16 ppm. High resolution mass spectra (HRMS) were recorded on P-SIMS-Gly of Bruker Daltonics Inc. using ESI-TOF (electrospray ionization-time of flight) or Micromass GCT using EI (electron impact). GC-MS analysis was performed on an Agilent 7890 GC/MS gas chromatograph mass spectrometer. Organic solutions were concentrated under reduced pressure on Heidolph rotary evaporator. TLC was performed on silica gel Huanghai HSGF<sub>254</sub> plates and visualized by quenching of UV fluorescence ( $\lambda_{\text{max}} = 254$  nm). Preparative TLC was performed on silica gel Xinnuo HSGF<sub>254</sub> preparative TLC plates. Silica gel (200–300 mesh) was purchased from Qingdao Haiyang Chemical Co., China.

The following chemicals were purchased as follow: Bromofluoromethane (CAS: 373-52-4, Shangfluoro, 98%); nickel(II) chloride ethylene glycol dimethyl ether complex (CAS: 29046-78-4, Strem, 98%); anhydrous potassium carbonate (CAS: 584-08-7, Sinopharm, 99%); bis(neopentyl glycolato)diboron (CAS: 201733-56-4, TCI, 98%); Tetrabutylammonium iodide (CAS: 311-28-4, Sigma-Aldrich, 99%); *N,N*-Dimethylacetimide (CAS: 127-19-5, J&K, 99.5%, Water < 0.005%). Unless otherwise noted, all other reagents and starting materials were purchased from commercial sources and used without further purification.

## Figure S1 Mechanistic study experiments and proposed mechanism.

### A. *in situ* generation of alkyl iodide 1a

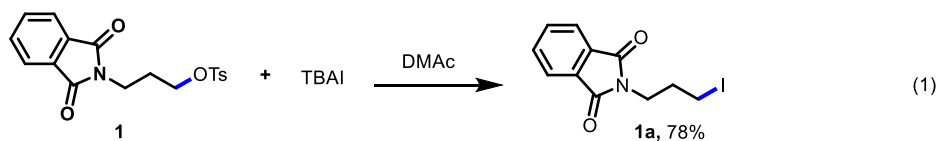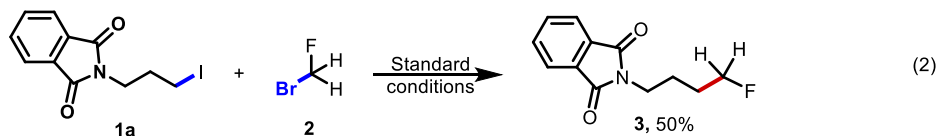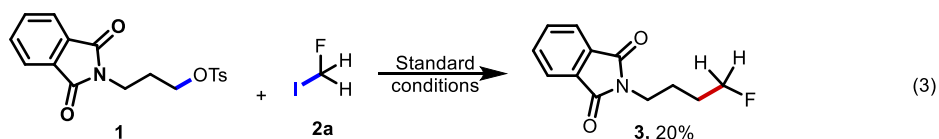

### B. *in situ* Suzuki process experiment

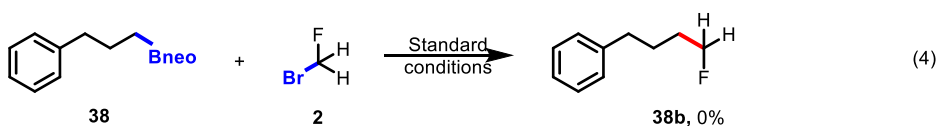

### C. radical trapping experiment

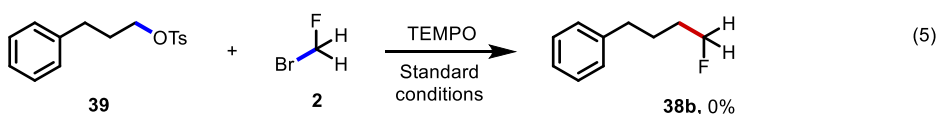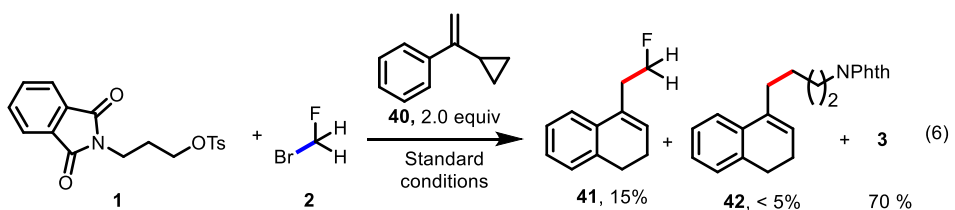

### D. Proposed mechanism

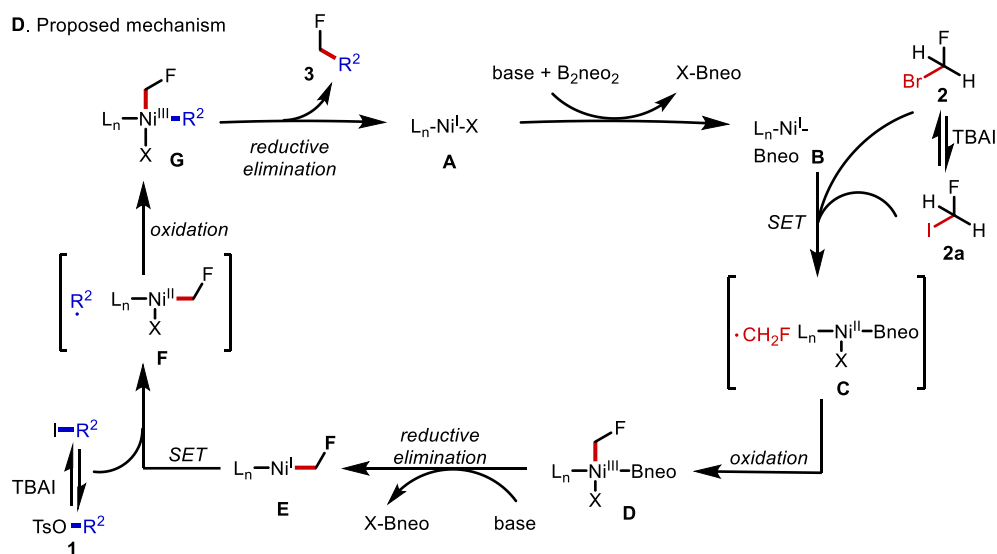

# Tables of the Optimization of Monofluoromethylation Reaction Conditions

## Table S1. Ligands Screening<sup>a</sup>

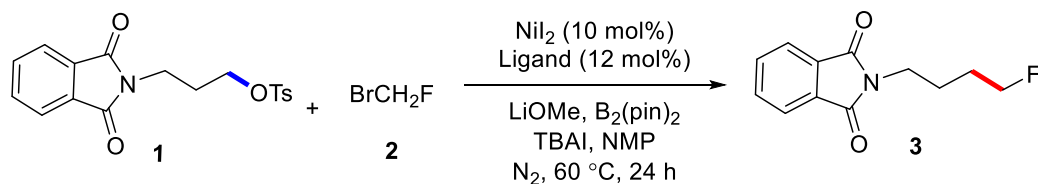

| Entry | Ligand (x mol%)            | Yield (%) <sup>b</sup> |
|-------|----------------------------|------------------------|
| 1     | bpy (12)                   | 8                      |
| 2     | dtbpy (12)                 | 10                     |
| 3     | phen (12)                  | 8                      |
| 4     | neocuprine (12)            | 10                     |
| 5     | dmbpy (12)                 | 11                     |
| 6     | 6-CN-bpy (12)              | trace                  |
| 7     | dCF <sub>3</sub> -bpy (12) | 0                      |
| 8     | Py (24)                    | 0                      |
| 9     | DMAP (24)                  | 0                      |
| 10    | 4-CN-Py (24)               | 0                      |
| 11    | PPh <sub>3</sub> (24)      | trace                  |
| 12    | <b>L</b> <sub>1</sub> (12) | 23                     |
| 13    | <b>L</b> <sub>2</sub> (12) | 20                     |
| 14    | <b>L</b> <sub>3</sub> (12) | 15                     |
| 15    | <b>L</b> <sub>4</sub> (12) | 12                     |
| 16    | <b>L</b> <sub>5</sub> (12) | 16                     |
| 17    | <b>L</b> <sub>6</sub> (12) | 18                     |
| 18    | <b>L</b> <sub>7</sub> (12) | 11                     |
| 19    | <b>L</b> <sub>8</sub> (12) | 10                     |

<sup>a</sup>Unless otherwise noted, the reaction conditions were as follows: **1** (0.2 mmol, 1.0 equiv), **2** (0.3 mmol, 1.5 equiv), NiI<sub>2</sub> (10 mol%), Ligand (x mmol%), B<sub>2</sub>(pin)<sub>2</sub> (0.4 mmol, 2 equiv), LiOMe (0.5 mmol, 2.5 equiv), TBAI (0.4 mmol, 2 equiv), NMP (1.0 mL), 60 °C, 24 h.

<sup>b</sup>Yields determined by <sup>19</sup>F NMR using PhCF<sub>3</sub> as an internal standard.

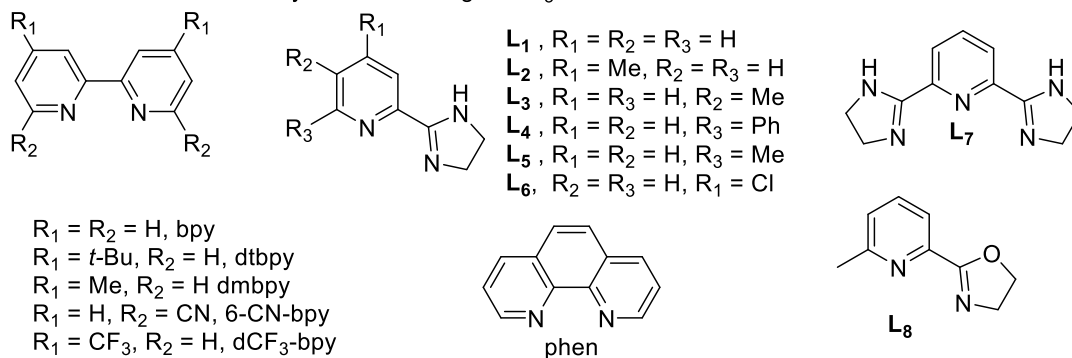

**Table S2 Reductants Screening<sup>a</sup>**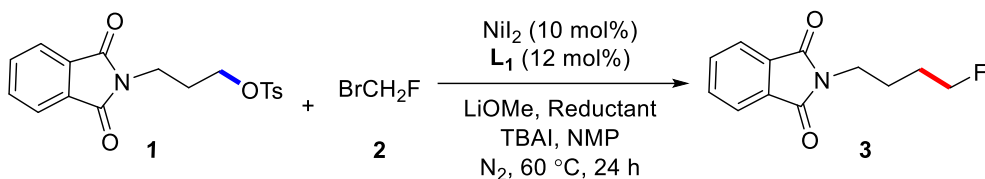

| Entry | Reductant                         | Yield (%) <sup>b</sup> |
|-------|-----------------------------------|------------------------|
| 1     | Mn                                | 0                      |
| 2     | Zn                                | 0                      |
| 3     | Fe                                | 0                      |
| 4     | B <sub>2</sub> (pin) <sub>2</sub> | 21                     |
| 5     | B <sub>2</sub> (neo) <sub>2</sub> | 30                     |

<sup>a</sup>Unless otherwise noted, the reaction conditions were as follows: **1** (0.2 mmol), **2** (0.3 mmol, 1.5 equiv.), NiI<sub>2</sub> (10 mol%), L<sub>1</sub> (12 mol%), reductant (0.4 mmol, 2 equiv), LiOMe (0.5 mmol, 2.5 equiv), TBAI (0.4 mmol, 2 equiv), NMP (1.0 mL), 60 °C, 24 h.

<sup>b</sup>Yield was determined by <sup>19</sup>F NMR spectroscopy using PhCF<sub>3</sub> as an internal standard.

**Table S3. Base Screening<sup>a</sup>**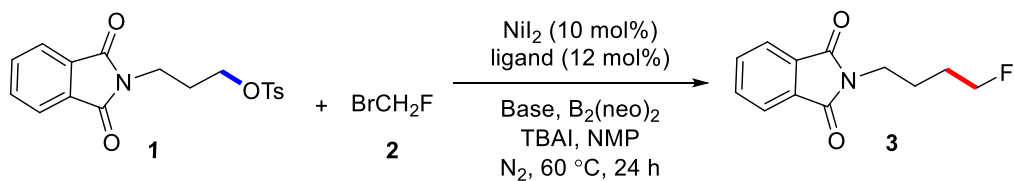

| Entry | Base                            | Yield (%) | Entry | Base                            | Yield (%) <sup>b</sup> |
|-------|---------------------------------|-----------|-------|---------------------------------|------------------------|
| 1     | KHCO <sub>3</sub>               | 65        | 6     | NaHCO <sub>3</sub>              | 52                     |
| 2     | KF                              | trace     | 7     | Na <sub>2</sub> CO <sub>3</sub> | 65                     |
| 3     | K <sub>3</sub> PO <sub>4</sub>  | 20        | 8     | LiOMe                           | 32                     |
| 4     | Cs <sub>2</sub> CO <sub>3</sub> | 32        | 9     | LiOtBu                          | 20                     |
| 5     | KOtBu                           | trace     | 10    | K <sub>2</sub> CO <sub>3</sub>  | 68                     |

<sup>a</sup>Unless otherwise noted, the reaction conditions were as follows: **1** (0.2 mmol), **2** (0.3 mmol, 1.5 equiv.), NiI<sub>2</sub> (10 mol%), L<sub>1</sub> (12 mol%), B<sub>2</sub>(neo)<sub>2</sub> (0.4 mmol, 2 equiv), Base (0.5 mmol, 2.5 equiv), TBAI (0.4 mmol, 2 equiv), NMP (1.0 mL), 60 °C, 24 h.

<sup>b</sup>Yield was determined by <sup>19</sup>F NMR spectroscopy using PhCF<sub>3</sub> as an internal standard.

**Table S4. Catalysts Screening<sup>a</sup>**

| Entry | [Ni]                                    | Yield (%) <sup>b</sup> | Entry | [Ni]                                                 | Yield (%) <sup>b</sup> |
|-------|-----------------------------------------|------------------------|-------|------------------------------------------------------|------------------------|
| 1     | No                                      | 0                      | 6     | NiCl <sub>2</sub> (dtbpy)                            | 18                     |
| 2     | NiBr <sub>2</sub>                       | 70                     | 7     | NiBr <sub>2</sub> (dtbpy)                            | 26                     |
| 3     | NiI <sub>2</sub>                        | 72                     | 8     | NiI <sub>2</sub> (dtbpy)                             | 20                     |
| 4     | NiCl <sub>2</sub>                       | 70                     | 9     | Ni(NO <sub>3</sub> ) <sub>2</sub> •6H <sub>2</sub> O | trace                  |
| 5     | Ni(OAc) <sub>2</sub> •4H <sub>2</sub> O | 23                     | 10    | NiBr <sub>2</sub> •(DME)                             | 75                     |

<sup>a</sup>Unless otherwise noted, the reaction conditions were as follows: **1** (0.2 mmol), **2** (0.3 mmol, 1.5 equiv.), [Ni] (10 mol%), **L**<sub>1</sub> (12 mol%), B<sub>2</sub>(neo)<sub>2</sub> (0.4 mmol, 2 equiv), K<sub>2</sub>CO<sub>3</sub> (0.5 mmol, 2.5 equiv), TBAI (0.4 mmol, 2 equiv), NMP (1.0 mL), 60 °C, 24 h.

<sup>b</sup>Yield was determined by <sup>19</sup>F NMR spectroscopy using PhCF<sub>3</sub> as an internal standard.

**Table S5 Additive screening<sup>a</sup>**

| Entry | Additive | Yield (%) <sup>b</sup> |
|-------|----------|------------------------|
| 1     | no       | 19                     |
| 2     | KI       | 65                     |
| 3     | NaI      | 65                     |
| 4     | TBAI     | 70                     |
| 5     | TBAC     | 50                     |
| 6     | TBAB     | 60                     |

<sup>a</sup>Unless otherwise noted, the reaction conditions were as follows: **1** (0.2 mmol), **2** (0.3 mmol, 1.5 equiv.), NiBr<sub>2</sub>•DME (10 mol%), **L**<sub>1</sub> (12 mol%), B<sub>2</sub>(neo)<sub>2</sub> (0.4 mmol, 2 equiv), K<sub>2</sub>CO<sub>3</sub> (0.5 mmol, 2.5 equiv), Additive (0.4 mmol, 2 equiv), NMP (1.0 mL), 60 °C, 24 h; TBAI = Tetrabutylammonium iodide; TBAB = Tetrabutylammonium bromide; TBAC = Tetrabutyl ammonium chloride.

<sup>b</sup>Yield was determined by <sup>19</sup>F NMR spectroscopy using PhCF<sub>3</sub> as an internal standard.

**Table S6 Temperature Screening<sup>a</sup>**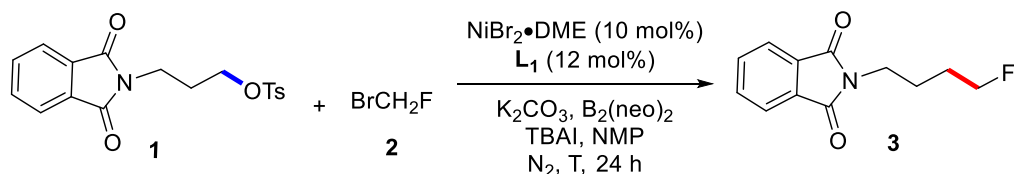

| Entry | T/ °C | Yield (%) <sup>b</sup> |
|-------|-------|------------------------|
| 1     | 30    | SM reserved            |
| 2     | 40    | SM reserved            |
| 3     | 50    | 43                     |
| 4     | 60    | 75                     |
| 5     | 70    | 70                     |
| 6     | 80    | 68                     |

<sup>a</sup>Unless otherwise noted, the reaction conditions were as follows: **1** (0.2 mmol), **2** (0.3 mmol, 1.5 equiv.), NiBr<sub>2</sub>·DME (10 mol%), L<sub>1</sub> (12 mol%), B<sub>2</sub>(neo)<sub>2</sub> (0.4 mmol, 2 equiv), K<sub>2</sub>CO<sub>3</sub> (0.5 mmol, 2.5 equiv), TBAI (0.4 mmol, 2 equiv), NMP (1.0 mL), T °C, 24 h;

<sup>b</sup>Yield was determined by <sup>19</sup>F NMR spectroscopy using PhCF<sub>3</sub> as an internal standard.

**Table S7 Optimization the amount of reagents<sup>a</sup>**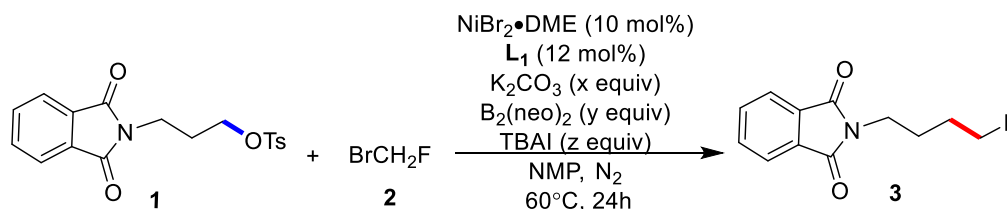

| entry | x (equiv) | y (equiv) | z (equiv) | yield (%) <sup>b</sup> |
|-------|-----------|-----------|-----------|------------------------|
| 1     | 2.0       | 2.0       | 2.0       | 65                     |
| 2     | 2.5       | 2.0       | 2.0       | 75                     |
| 3     | 3.0       | 2.0       | 2.0       | 74                     |
| 4     | 2.5       | 1.5       | 2.0       | 48                     |
| 5     | 2.5       | 2.5       | 2.0       | 68                     |
| 6     | 2.5       | 2.0       | 1.0       | 40                     |
| 7     | 2.5       | 2.0       | 1.5       | 61                     |
| 8     | 2.5       | 2.0       | 2.5       | 70                     |

<sup>a</sup>Unless otherwise noted, the reaction conditions were as follows: **1** (0.2 mmol), **2** (0.3 mmol, 1.5 equiv.), NiBr<sub>2</sub>·DME (10 mol%), L<sub>1</sub> (12 mol%), K<sub>2</sub>CO<sub>3</sub> (x equiv), B<sub>2</sub>neo<sub>2</sub> (y equiv), TBAI (z equiv), NMP (1.0 mL), 60 °C, 24 h.

<sup>b</sup>Yield was determined by <sup>19</sup>F NMR spectroscopy using PhCF<sub>3</sub> as an internal standard.



**Table S8 Solvent Screening<sup>a</sup>**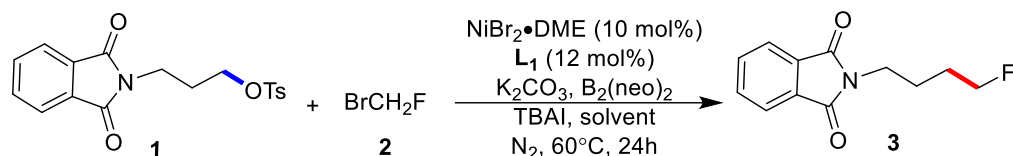

| Entry | solvent      | Yield (%) <sup>b</sup> | Entry | solvent           | Yield (%) <sup>b</sup> |
|-------|--------------|------------------------|-------|-------------------|------------------------|
| 1     | THF          | 31                     | 8     | NMP               | 73                     |
| 2     | dioxane      | trace                  | 9     | DMF               | 38                     |
| 3     | DMSO         | NR                     | 10    | DMAc              | 80                     |
| 4     | DCE          | 0                      | 11    | DMPU              | 36                     |
| 5     | MeCN         | 40                     | 12    | NMP/DMAc(1:1)     | NR                     |
| 6     | NMP/THF(7:3) | 73                     | 13    | NMP/DMAc(3:7)     | 60                     |
| 7     | NMP/THF(1:1) | 52                     | 14    | PhNO <sub>2</sub> | 0                      |

<sup>a</sup>Unless otherwise noted, the reaction conditions were as follows: **1** (0.2 mmol), **2** (0.3 mmol, 1.5 equiv.), NiBr<sub>2</sub>·DME (10 mol%), L<sub>1</sub> (12 mol%), B<sub>2</sub>(neo)<sub>2</sub> (0.4 mmol, 2 equiv), K<sub>2</sub>CO<sub>3</sub> (0.5 mmol, 2.5 equiv), TBAI (0.4 mmol, 2 equiv), solvent (1.0 mL), 60 °C, 24 h.

<sup>b</sup>Yield was determined by <sup>19</sup>F NMR spectroscopy using PhCF<sub>3</sub> as an internal standard

**Table S9. Optimization the amount of bromofluoromethane<sup>a</sup>**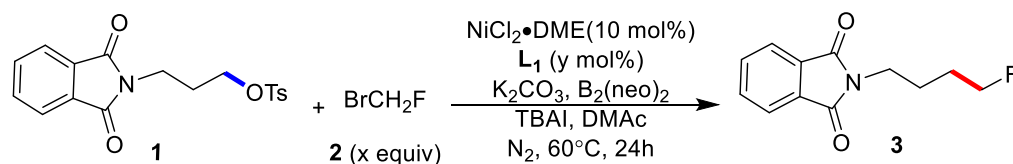

| Entry          | BrCH <sub>2</sub> F (x equiv) | L <sub>1</sub> (y mol%) | Yield (%) <sup>b</sup> |
|----------------|-------------------------------|-------------------------|------------------------|
| 1              | 1.0                           | L <sub>1</sub> (12)     | 36                     |
| 2              | 1.5                           | L <sub>1</sub> (12)     | 63                     |
| 3              | 2.0                           | L <sub>1</sub> (12)     | 83                     |
| 4              | 2.5                           | L <sub>1</sub> (12)     | 72                     |
| 5              | 2.0                           | L <sub>1</sub> (10)     | 71                     |
| 6 <sup>c</sup> | 2.0                           | L <sub>1</sub> (13.5)   | 80                     |
| 7              | 2.0                           | L <sub>1</sub> (13.5)   | 87(85)                 |

<sup>a</sup>Unless otherwise noted, the reaction conditions were as follows: **1** (0.2 mmol), **2** (x equiv.), NiCl<sub>2</sub>·DME (10 mol%), L<sub>1</sub> (y mol%), B<sub>2</sub>(neo)<sub>2</sub> (0.4 mmol, 2 equiv), K<sub>2</sub>CO<sub>3</sub> (0.5 mmol, 2.5 equiv), TBAI (0.4 mmol, 2 equiv), DMAc (1.0 mL), 60 °C, 24 h;

<sup>b</sup>Yield was determined by <sup>19</sup>F NMR spectroscopy using PhCF<sub>3</sub> as an internal standard; numbers in parentheses were yields of isolated products. <sup>c</sup>NiBr<sub>2</sub>·DME.

## Preparation of Substrates:

Unless otherwise noted, all the alkyl alcohols were purchased from commercial sources and alkyl tosylates were prepared in the reported literature. Ligands **L1-L5** were synthesized using known method<sup>1</sup>, alkyl Bneo **38**<sup>2</sup>, alkene **40**<sup>3</sup> was synthesized according to the references. Compound **43**<sup>4</sup> was synthesized through known method.

## Preparation of Bioactive Molecule Alkyl tosylates.

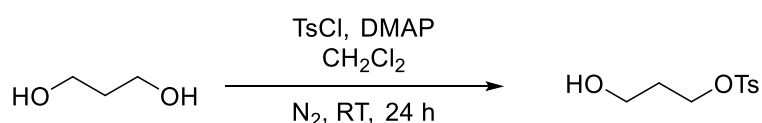

To a flask equipped with a magnetic stir bar were added 1,3-diol (25 mmol, 1 equiv) and 4-(dimethylamino)pyridine (0.375 mmol, 1.5 mol %) dissolved in DCM (40 mL), triethylamine (27.5 mmol, 1.1 equiv) were added. The mixture was stirred for 15 min before *p*-toluenesulfonyl chloride (25 mmol, 1.0 equiv) in dichloromethane (8 mL) was added dropwise and stirred at 30 °C for another 4 hours. The reaction mixture was then filtrated, 100 ml of dichloromethane were added and the organic solution was washed with 1% HCl (2 × 40 mL), saturated sodium bicarbonate (2 × 40 mL), brine (2 × 40 mL), dried over magnesium sulfate and concentrated in vacuo. The product was purified by column chromatography on silica gel (silica gel, PE/EA 2:1) to afford the desired *mono*-tosylated alcohol.

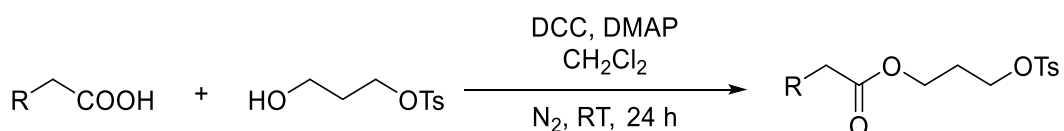

To a solution of acid (5 mmol), 3-OTs-1-propanol (6 mmol) and DMAP (0.5 mmol) dissolved in 20 mL CH<sub>2</sub>Cl<sub>2</sub>, a solution of DCC (6 mmol) in DCM (10 mL) was slowly added under stirring and proceeded at room temperature overnight. The reaction mixture was then filtered and the solid was rinsed with DCM (2 x 10 mL). The combined filtrates were concentrated under vacuum and purified by column chromatography affording desired product.

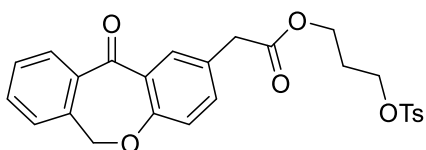

The 3-(tosyloxy)propyl 2-(11-oxo-6,11-dihydrodibenzo[b,e]oxepin-2-yl)acetate was purified with silica gel chromatography (PE/EA = 3:1) as a colorless solid (2.1 g, 89% yield).

**<sup>1</sup>H NMR** (500 MHz, CDCl<sub>3</sub>): δ 8.08 (d, *J* = 2.4 Hz, 1H), 7.89 (dd, *J* = 7.6, 1.4 Hz, 1H), 7.77 (d, *J* = 8.4 Hz, 2H), 7.57 (td, *J* = 7.4, 1.4 Hz, 1H), 7.48 (td, *J* = 7.6, 1.3 Hz, 1H), 7.42 – 7.30 (m, 4H), 7.03 (d, *J* = 8.4 Hz, 1H), 5.19 (s, 2H), 4.13 (t, *J* = 6.1 Hz, 2H), 4.09 (t, *J* = 6.1 Hz, 2H), 3.57 (s, 2H), 2.44 (s, 3H), 1.98 (q, *J* = 6.2 Hz, 2H).

**<sup>13</sup>C NMR** (126 MHz, CDCl<sub>3</sub>): δ 190.91, 171.20, 160.64, 145.04, 140.52, 136.38, 135.67, 132.96, 132.95, 132.50, 130.02, 129.62, 129.40, 128.03, 127.96, 127.64, 125.25, 121.26, 73.77, 66.86, 60.78, 40.14, 28.30, 21.78.

**HRMS** ESI (*m/z*): [M+H]<sup>+</sup> calcd. for C<sub>26</sub>H<sub>25</sub>O<sub>7</sub>S: 481.1316, found: 481.1313.

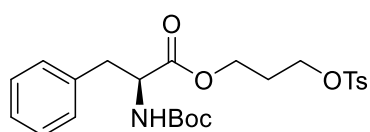

The Boc-L-phenylalanine alkyl tosylate was purified with silica gel chromatography (PE/EA = 8:1) as a colorless solid (1.8 g, 74% yield).

**<sup>1</sup>H NMR** (400 MHz, CDCl<sub>3</sub>): δ 7.80 – 7.75 (m, 2H), 7.34 (d, *J* = 8.1 Hz, 2H), 7.31 – 7.17 (m, 3H), 7.15 – 7.04 (m, 2H), 5.05 (d, *J* = 8.3 Hz, 1H), 4.46 (d, *J* = 7.3 Hz, 1H), 4.10 (t, *J* = 6.1 Hz, 2H), 3.99 (t, *J* = 6.3 Hz, 2H), 2.99 (d, *J* = 6.5 Hz, 2H), 2.42 (s, 3H), 1.89 (m, 2H), 1.41 (s, 9H).

**<sup>13</sup>C NMR** (126 MHz, CDCl<sub>3</sub>): δ 171.61, 154.99, 144.94, 135.94, 132.75, 129.88, 129.15, 128.48, 127.80, 126.97, 79.82, 66.63, 60.83, 54.44, 38.28, 28.22, 28.06, 21.54.

**HRMS** ESI (*m/z*): [M+Na]<sup>+</sup> calcd. for C<sub>24</sub>H<sub>31</sub>NO<sub>7</sub>SNa: 500.1713, found: 500.1720.

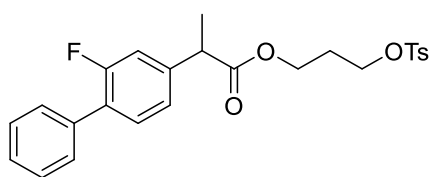

The 3-(tosyloxy) propyl 2-(2-fluoro-[1,1'-biphenyl]-4-yl) propanoate was purified with silica gel chromatography (PE/EA = 6:1) as a colorless solid (2.0 g, 90% yield).

**<sup>1</sup>H NMR** (400 MHz, CDCl<sub>3</sub>): δ 7.76 (d, *J* = 8.2 Hz, 2H), 7.53 (d, *J* = 8.1 Hz, 2H), 7.44 (t, *J* = 7.5 Hz, 2H), 7.38 (m, 2H), 7.31 (d, *J* = 8.0 Hz, 2H), 7.15 – 7.03 (m, 2H), 4.14 (t, *J* = 6.1 Hz, 2H), 4.03 (t, *J* = 6.1 Hz, 2H), 3.69 (q, *J* = 7.1 Hz, 1H), 2.43 (s, 3H), 2.01 – 1.90 (m, 2H), 1.49 (d, *J* = 7.2 Hz, 3H).

**<sup>13</sup>C NMR** (126 MHz, CDCl<sub>3</sub>): δ 173.77, 159.79 (d, *J* = 248.5 Hz), 145.02, 141.70 (d, *J* = 7.7 Hz), 135.54, 133.03, 130.99 (d, *J* = 4.0 Hz), 130.01, 129.08 (d, *J* = 2.9 Hz), 128.59, 128.02 (d, *J* = 13.5 Hz), 128.00, 127.84, 123.62 (d, *J* = 3.3 Hz), 115.30 (d, *J* = 23.6 Hz), 66.80, 60.79, 45.03, 28.36, 21.77, 18.33.

**HRMS** ESI (m/z): [M+Na]<sup>+</sup> calcd. for C<sub>25</sub>H<sub>25</sub>FO<sub>5</sub>SNa: 479.1299, found: 479.1302.

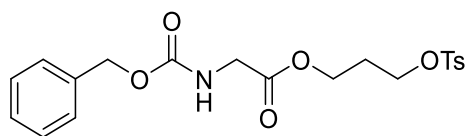

*N*-Carbobenzyloxylglycine alkyl tosylate was purified with silica gel chromatography (PE/EA = 8:1) as a colorless solid (1.7 g, 80% yield).

**<sup>1</sup>H NMR** (400 MHz, Chloroform-*d*): δ 7.78 (d, *J* = 8.2 Hz, 2H), 7.41 – 7.31 (m, 7H), 5.24 (t, *J* = 5.9 Hz, 1H), 5.13 (s, 2H), 4.19 (t, *J* = 6.1 Hz, 2H), 4.10 (t, *J* = 6.0 Hz, 2H), 3.90 (d, *J* = 5.6 Hz, 2H), 2.44 (s, 3H), 1.99 (m, 2H).

**<sup>13</sup>C NMR** (126 MHz, Chloroform-*d*): δ 169.84, 156.35, 145.15, 136.30, 132.89, 130.04, 128.67, 128.36, 128.25, 128.03, 67.26, 66.67, 61.23, 42.77, 28.19, 21.76.

**HRMS** ESI (m/z): [M+Na]<sup>+</sup> calcd. for C<sub>20</sub>H<sub>23</sub>NO<sub>7</sub>SNa: 444.1087, found: 444.1088.

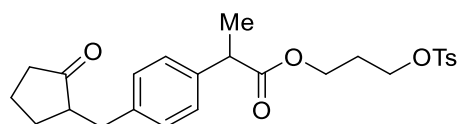

The 3-(tosyloxy)propyl 2-(4-((2-oxocyclopentyl)methyl)phenyl)propanoate was purified with silica gel chromatography (PE/EA = 7:1) as a colorless solid (2.0 g, 87% yield).

**<sup>1</sup>H NMR** (400 MHz, Chloroform-*d*): δ 7.75 (d, *J* = 8.3 Hz, 2H), 7.35 (d, *J* = 8.0 Hz, 2H), 7.16 (d, *J* = 8.3 Hz, 2H), 7.11 (d, *J* = 8.2 Hz, 2H), 4.08 (t, *J* = 6.1 Hz, 2H), 4.00 (t, *J* = 6.2 Hz, 2H), 3.62 (q, *J* = 7.2 Hz, 1H), 3.11 (dd, *J* = 13.8, 4.1 Hz, 1H), 2.55 – 2.47 (m, 1H), 2.45 (s, 3H), 2.39 – 2.29 (m, 2H), 2.20 – 2.04 (m, 2H), 2.01 – 1.86 (m, 2H), 1.84 – 1.64 (m, 1H), 1.62 – 1.48 (m, 1H), 1.43 (d, *J* = 7.1 Hz, 3H).

**<sup>13</sup>C NMR** (101 MHz, CDCl<sub>3</sub>) δ 220.12, 174.20, 144.90, 138.94, 138.09, 132.84, 129.88, 129.11, 127.82, 127.41, 77.48, 77.16, 76.84, 66.75, 60.26, 50.92, 44.92, 38.13, 35.13, 29.17, 28.15, 21.62, 20.49, 18.27.

**HRMS** ESI (m/z): [M+Na]<sup>+</sup> calcd. for C<sub>25</sub>H<sub>30</sub>O<sub>6</sub>SNa: 481.1655., found: 481.1659.

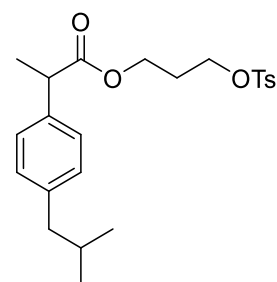

The 3-(tosyloxy)propyl 2-(4-isobutylphenyl)propanoate was purified with silica gel chromatography (PE/EA = 7:1) as a colorless solid (1.8 g, 87% yield).

**<sup>1</sup>H NMR** (400 MHz, CDCl<sub>3</sub>): δ 7.84 – 7.70 (m, 2H), 7.33 (d, *J* = 8.0 Hz, 2H), 7.14 (d, *J* = 8.1 Hz, 2H), 7.07 (d, *J* = 8.0 Hz, 2H), 4.08 (t, *J* = 6.1 Hz, 2H), 3.99 (t, *J* = 6.2 Hz, 2H), 3.61 (q, *J* = 7.1 Hz, 1H), 2.45 (s, 3H), 1.90 (tt, *J* = 6.3, 3.1 Hz, 2H), 1.86 – 1.77 (m, 1H), 1.44 (d, *J* = 7.2 Hz, 3H), 0.89 (d, *J* = 6.6 Hz, 6H).

**<sup>13</sup>C NMR** (101 MHz, CDCl<sub>3</sub>): δ 174.47, 144.93, 140.69, 137.58, 133.00, 129.96, 129.42, 127.96, 127.15, 66.85, 60.32, 45.10, 45.08, 30.27, 28.30, 22.47, 21.74, 18.39.

**HRMS** ESI (m/z): [M+Na]<sup>+</sup> calcd. for C<sub>23</sub>H<sub>30</sub>O<sub>5</sub>SNa: 441.1706, found: 441.1710.

## Preparation of BrCFH<sub>2</sub> Stock Solution

Anhydrous DMAc (~23 mL) was added to a Schlenk graduated cylinder under nitrogen. The vessel and solvent were weighed. Next, BrCFH<sub>2</sub> was bubbled through the DMAc solution using a long needle until the total volume of the solution reached approximately 25 mL. The vessel was sealed and weighed again. The concentration of the BrCFH<sub>2</sub> stock solution was calculated based on the mass of BrCFH<sub>2</sub> added and the total volume of the solution (~2.0 mol/L).

## General Procedure for Nickel-catalyzed Cross-Coupling between Alkyl tosylates and Bromofluoromethane

In glove box, alkyl tosylate **1** (if solid, 1.0 equiv, 0.2 mmol), NiCl<sub>2</sub>•DME (10 mol %, 0.02 mmol, 4.4 mg), L<sub>1</sub> (13.5 mol%, 0.027 mmol, 4.0 mg), Bis(neopentyl glycolato)diboron (2.0 equiv, 0.4 mmol, 90.4 mg), K<sub>2</sub>CO<sub>3</sub> (2.5 equiv, 0.5 mmol, 69 mg) and Tetrabutylammonium iodide (2.0 equiv, 0.4 mmol, 148 mg) were combined in a 5 mL oven-dried sealing tube. The vessel was evacuated and backfilled with N<sub>2</sub> (repeated for 3 times), and alkyl tosylate **1** (if liquid, 1.0 equiv, 0.2 mmol), Bromofluoromethane **2** (2.0 equiv, 0.4 mmol dissolved in DMAc) and *N,N*-Dimethylacetamide (1.0 mL) were then added via syringe. The tube was sealed with a Teflon lined cap and heated in a preheated oil bath at 60 °C for 24 h. The reaction mixture was then cooled to room temperature, diluted with EtOAc (~20 mL) and filtered through a pad of celite. The filtrate was added brine (20 mL) and extracted with EtOAc (2×15 mL), the combined organic layer was dried over Na<sub>2</sub>SO<sub>4</sub>, filtrated and concentrated under vacuum. The residue was then purified by flash column chromatography to give desired product as a colorless solid or oil.

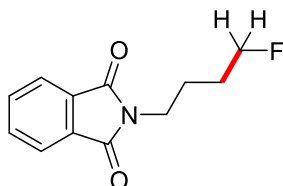

---

The product **3** was purified with silica gel chromatography (PE/EA = 5:1) as a colorless solid (37.6 mg, 85% yield).

**<sup>1</sup>H NMR** (400 MHz, CDCl<sub>3</sub>): δ 7.85 (dd, *J* = 5.4, 3.1 Hz, 2H), 7.72 (dd, *J* = 5.4, 3.1 Hz, 2H), 4.48 (dt, *J* = 47.6, 5.7 Hz, 2H), 3.75 (t, *J* = 6.8 Hz, 2H), 1.88 – 1.67 (m, 4H).

**<sup>13</sup>C NMR** (126 MHz, CDCl<sub>3</sub>): δ 168.55, 134.11, 132.21, 123.39, 83.51 (d, *J* = 165.3 Hz), 37.60, 27.91 (d, *J* = 20.0 Hz), 24.74 (d, *J* = 4.8 Hz).

**<sup>19</sup>F NMR** (376 MHz, CDCl<sub>3</sub>): δ -218.82 (tt, *J* = 46.9, 25.0 Hz).

**HRMS** ESI (m/z): [M+H]<sup>+</sup> calcd. for C<sub>12</sub>H<sub>13</sub>FNO<sub>2</sub>: 222.0925, found: 222.0915.

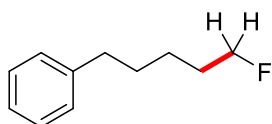

The product **4** was purified with silica gel chromatography (PE/EA = 100:1) as a colorless oil (18.9 mg, 57% yield).

**<sup>1</sup>H NMR** (400 MHz, CDCl<sub>3</sub>): δ 7.31 – 7.27 (m, 2H), 7.21 – 7.15 (m, 3H), 4.44 (dt, *J* = 47.3, 6.1 Hz, 2H), 2.65 – 2.60 (m, 2H), 1.78 – 1.62 (m, 4H), 1.50 – 1.40 (m, 2H).

**<sup>13</sup>C NMR** (126 MHz, CDCl<sub>3</sub>): δ 142.52, 128.51, 128.42, 125.84, 84.24 (d, *J* = 164.1 Hz), 35.95, 31.26, 30.42 (d, *J* = 19.4 Hz), 24.99 (d, *J* = 5.5 Hz).

**<sup>19</sup>F NMR** (376 MHz, CDCl<sub>3</sub>): δ -218.06 (tt, *J* = 47.1, 24.9 Hz).

**HRMS** EI (m/z): [M]<sup>+</sup> calcd. for C<sub>11</sub>H<sub>15</sub>F: 166.1158, found: 166.1151.

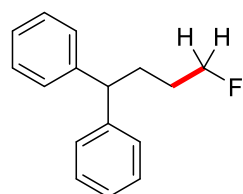

The product **5** was purified with silica gel chromatography (PE/EA = 75:1) as a colorless oil (29.7 mg, 65% yield).

**<sup>1</sup>H NMR** (400 MHz, CDCl<sub>3</sub>): δ 7.31 – 7.22 (m, 8H), 7.20 – 7.14 (m, 2H), 4.43 (dt, *J* = 47.3, 6.0 Hz, 2H), 3.92 (t, *J* = 7.9 Hz, 1H), 2.23 – 2.12 (m, 2H), 1.75 – 1.57 (m, 2H).

**<sup>13</sup>C NMR** (101 MHz, CDCl<sub>3</sub>): δ 144.75, 128.64, 127.94, 126.38, 84.13 (d, *J* = 164.8 Hz), 51.06, 31.41 (d, *J* = 4.6 Hz), 29.16 (d, *J* = 19.7 Hz).

**<sup>19</sup>F NMR** (376 MHz, CDCl<sub>3</sub>): δ -218.47 (tt, *J* = 47.5, 26.0 Hz).

**HRMS** EI (m/z): [M]<sup>+</sup> calcd. for C<sub>16</sub>H<sub>17</sub>F: 228.1309, found: 228.1304.

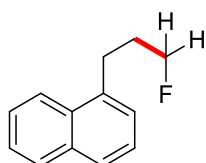

The product **6** was purified with silica gel chromatography (PE/EA = 50:1) as a colorless oil (23 mg, 61% yield).

**<sup>1</sup>H NMR** (500 MHz, CDCl<sub>3</sub>): δ 7.96 (d, *J* = 8.3 Hz, 1H), 7.83 – 7.76 (m, 1H), 7.65 (d, *J* = 8.2 Hz, 1H), 7.48 – 7.37 (m, 2H), 7.33 (t, *J* = 7.5 Hz, 1H), 7.27 (d, *J* = 7.0 Hz, 1H), 4.44 (dt, *J* = 47.2, 5.8 Hz, 2H), 3.19 – 3.10 (m, 2H), 2.15 – 1.99 (m, 2H).

**<sup>13</sup>C NMR** (126 MHz, CDCl<sub>3</sub>): δ 137.28, 134.04, 131.86, 128.96, 127.03, 126.39, 126.06, 125.67, 123.75, 83.51 (d, *J* = 164.9 Hz), 31.50 (d, *J* = 19.8 Hz), 28.62 (d, *J* = 5.0 Hz).

**<sup>19</sup>F NMR** (376 MHz, CDCl<sub>3</sub>): δ -219.85 (tt, *J* = 47.2, 26.4 Hz).

**HRMS** EI (m/z): [M]<sup>+</sup> calcd. for C<sub>13</sub>H<sub>13</sub>F: 188.1001, found: 188.0994.

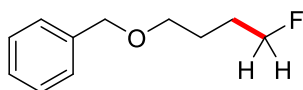

The product **7** was purified with silica gel chromatography (PE/EA = 80:1) as a colorless oil (17.5 mg, 48% yield).

**<sup>1</sup>H NMR** (400 MHz, CDCl<sub>3</sub>): δ 7.38 – 7.31 (m, 4H), 7.31 – 7.26 (m, 1H), 4.51 (s, 2H), 4.47 (dt, *J* = 47.3, 5.8 Hz, 2H), 3.52 (t, *J* = 6.3 Hz, 2H), 1.88 – 1.68 (m, 4H).

**<sup>13</sup>C NMR** (101 MHz, CDCl<sub>3</sub>): δ 138.60, 128.51, 127.74, 127.70, 84.10 (d, *J* = 164.2 Hz), 73.03, 69.82, 27.48 (d, *J* = 19.8 Hz), 25.70 (d, *J* = 5.2 Hz).

**<sup>19</sup>F NMR** (376 MHz, CDCl<sub>3</sub>): δ -218.25 (tt, *J* = 47.7, 25.6 Hz).

**HRMS** ESI (m/z): [M+Na]<sup>+</sup> calcd. for C<sub>11</sub>H<sub>15</sub>FONa: 205.0999, found: 205.1013.

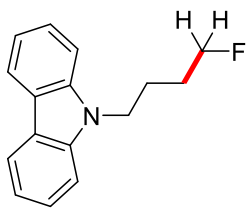

The product **8** was purified with silica gel chromatography (PE/EA = 6:1) as a colorless oil (41.0 mg, 85% yield).

**<sup>1</sup>H NMR** (400 MHz, CDCl<sub>3</sub>): δ 8.01 (d, *J* = 7.7 Hz, 2H), 7.37 (m, 2H), 7.29 (d, *J* = 8.2 Hz, 2H), 7.19 – 7.11 (m, 2H), 4.31 (dt, *J* = 47.3, 5.8 Hz, 2H), 4.24 (t, *J* = 7.1 Hz, 2H), 1.96 – 1.86 (m, 2H), 1.71 – 1.54 (m, 2H).

**<sup>13</sup>C NMR** (126 MHz, CDCl<sub>3</sub>): δ 140.39, 125.78, 122.94, 120.50, 118.99, 108.68, 83.85 (d, *J* = 165.2 Hz), 42.59, 28.21 (d, *J* = 19.8 Hz), 25.23 (d, *J* = 4.1 Hz).

**<sup>19</sup>F NMR** (376 MHz, CDCl<sub>3</sub>): δ -218.47 (tt, *J* = 47.4, 26.3 Hz).

**HRMS** ESI (m/z): [M+H]<sup>+</sup> calcd. for C<sub>16</sub>H<sub>17</sub>FN: 242.1340, found: 242.1339.

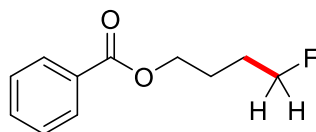

The product **9** was purified with silica gel chromatography (PE/EA = 10:1) as a colorless oil (22.8 mg, 58% yield).

**<sup>1</sup>H NMR** (400 MHz, CDCl<sub>3</sub>): δ 8.11 – 7.97 (m, 2H), 7.62 – 7.51 (m, 1H), 7.50 – 7.40 (m, 2H), 4.53 (dt, *J* = 47.3, 5.7 Hz, 2H), 4.38 (t, *J* = 6.3 Hz, 2H), 2.01 – 1.76 (m, 4H).

**<sup>13</sup>C NMR** (101 MHz, CDCl<sub>3</sub>): δ 166.70, 133.08, 130.37, 129.66, 128.50, 83.67 (d, *J* = 165.1 Hz), 64.52, 27.33 (d, *J* = 20.1 Hz), 24.91 (d, *J* = 5.1 Hz).

**<sup>19</sup>F NMR** (376 MHz, CDCl<sub>3</sub>): δ -218.83 (tt, *J* = 46.8, 25.3 Hz).

**HRMS** ESI (m/z): [M+H]<sup>+</sup> calcd. for C<sub>11</sub>H<sub>14</sub>FO<sub>2</sub>: 197.0972, found: 197.0967.

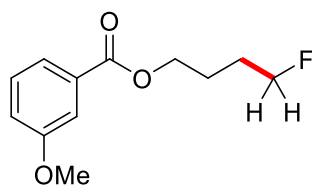

The product **10** was purified with silica gel chromatography (PE/EA = 8:1) as a colorless oil (32.6 mg, 72% yield).



**<sup>1</sup>H NMR** (400 MHz, CDCl<sub>3</sub>): δ 7.63 (dt, *J* = 7.6, 1.3 Hz, 1H), 7.56 (dd, *J* = 2.7, 1.5 Hz, 1H), 7.35 (t, *J* = 7.9 Hz, 1H), 7.10 (ddd, *J* = 8.3, 2.7, 1.1 Hz, 1H), 4.52 (dt, *J* = 47.1, 5.6 Hz, 2H), 4.37 (t, *J* = 6.2 Hz, 2H), 3.85 (s, 3H), 2.01 – 1.76 (m, 4H).

**<sup>13</sup>C NMR** (101 MHz, CDCl<sub>3</sub>): δ 166.56, 159.69, 131.70, 129.53, 122.05, 119.47, 114.25, 83.64 (d, *J* = 165.1 Hz), 64.62, 55.57, 27.33 (d, *J* = 20.0 Hz), 24.91 (d, *J* = 5.0 Hz).

**<sup>19</sup>F NMR** (376 MHz, CDCl<sub>3</sub>): δ -218.88 (tt, *J* = 47.2, 25.4 Hz).

**HRMS** ESI (m/z): [M+H]<sup>+</sup> calcd. for C<sub>12</sub>H<sub>16</sub>FO<sub>3</sub>: 227.1078, found: 227.1081.

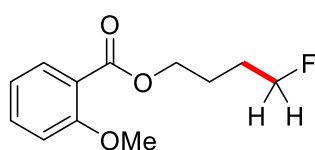

The product **11** was purified with silica gel chromatography (PE/EA = 8:1) as a colorless oil (36.2 mg, 80% yield).

**<sup>1</sup>H NMR** (400 MHz, CDCl<sub>3</sub>): δ 7.79 (dd, *J* = 7.9, 1.6 Hz, 1H), 7.55 – 7.40 (m, 1H), 7.06 – 6.91 (m, 2H), 4.52 (dt, *J* = 47.6, 5.5 Hz, 2H), 4.35 (t, *J* = 5.9 Hz, 2H), 3.90 (s, 3H), 2.02 – 1.80 (m, 4H).

**<sup>13</sup>C NMR** (101 MHz, CDCl<sub>3</sub>): δ 166.38, 159.26, 133.62, 131.66, 120.24, 112.13, 83.71 (d, *J* = 164.8 Hz), 64.34, 56.04, 27.33 (d, *J* = 20.0 Hz), 24.81 (d, *J* = 5.3 Hz).

**<sup>19</sup>F NMR** (376 MHz, CDCl<sub>3</sub>): δ -218.71 (tt, *J* = 46.4, 25.9 Hz).

**HRMS** ESI (m/z): [M+H]<sup>+</sup> calcd. for C<sub>12</sub>H<sub>16</sub>FO<sub>3</sub>: 227.1078, found: 227.1085.

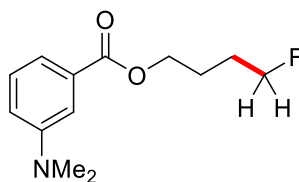

The product **12** was purified with silica gel chromatography (PE/EA = 8:1) as a colorless oil (28.7 mg, 60% yield).

**<sup>1</sup>H NMR** (400 MHz, CDCl<sub>3</sub>): δ 7.43 – 7.35 (m, 2H), 7.30 (d, *J* = 8.0 Hz, 1H), 6.91 (dd, *J* = 8.3, 2.8 Hz, 1H), 4.52 (dt, *J* = 47.3, 5.7 Hz, 2H), 4.36 (t, *J* = 6.2 Hz, 2H), 2.99 (s, 6H), 1.83 (m, 4H).

**<sup>13</sup>C NMR** (126 MHz, CDCl<sub>3</sub>): δ 167.36, 150.49, 130.96, 129.11, 117.58, 116.91, 113.30, 83.71 (d, *J* = 165.0 Hz), 64.38, 40.69, 27.32 (d, *J* = 19.9 Hz), 24.86 (d, *J* = 5.1 Hz).

**<sup>19</sup>F NMR** (376 MHz, CDCl<sub>3</sub>): δ -218.79 (tt, *J* = 47.6, 26.0 Hz).

**HRMS** ESI (m/z): [M+H]<sup>+</sup> calcd. for C<sub>13</sub>H<sub>19</sub>FNO<sub>2</sub>: 240.1394, found: 240.1399.

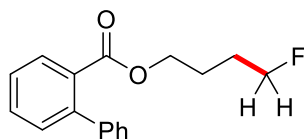

The product **13** was purified with silica gel chromatography (PE/EA = 8:1) as a colorless oil (35.4 mg, 65% yield).

**<sup>1</sup>H NMR** (400 MHz, CDCl<sub>3</sub>): δ 7.85 – 7.79 (m, 1H), 7.53 (td, *J* = 7.6, 1.2 Hz, 1H), 7.45 – 7.30 (m, 7H), 4.28 (dt, *J* = 47.5, 5.9 Hz, 2H), 4.07 (t, *J* = 6.1 Hz, 2H), 1.53 – 1.30 (m, 4H).

**<sup>13</sup>C NMR** (126 MHz, CDCl<sub>3</sub>): δ 169.13, 142.32, 141.69, 131.33, 131.24, 130.78, 129.91, 128.45, 128.21, 127.33, 127.30, 83.53 (d, *J* = 164.8 Hz), 64.50, 26.81 (d, *J* = 19.8 Hz), 24.25 (d, *J* = 5.1 Hz).

**<sup>19</sup>F NMR** (376 MHz, CDCl<sub>3</sub>): -219.01 (tt, *J* = 47.6, 26.0 Hz).

**HRMS** ESI (m/z): [M+Na]<sup>+</sup> calcd. for C<sub>17</sub>H<sub>17</sub>FO<sub>2</sub>Na: 295.1105, found: 295.1109.

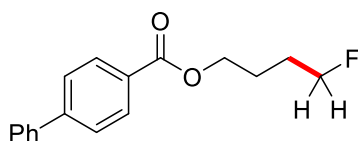

The product **14** was purified with silica gel chromatography (PE/EA = 8:1) as a colorless oil (40.8 mg, 75% yield).

**<sup>1</sup>H NMR** (500 MHz, CDCl<sub>3</sub>): δ 8.02 (d, *J* = 8.4 Hz, 2H), 7.57 (d, *J* = 8.4 Hz, 2H), 7.53 (d, *J* = 7.2 Hz, 2H), 7.41 – 7.31 (m, 2H), 7.30 (t, *J* = 7.3 Hz, 1H), 4.44 (dt, *J* = 47.6, 5.7 Hz, 2H), 4.30 (t, *J* = 6.2 Hz, 2H), 1.89 – 1.69 (m, 4H).

**<sup>13</sup>C NMR** (126 MHz, CDCl<sub>3</sub>): δ 166.54, 145.77, 140.08, 130.17, 129.09, 129.04, 128.26, 127.37, 127.16, 83.64 (d, *J* = 165.2 Hz), 64.51, 27.32 (d, *J* = 19.9 Hz), 24.93 (d, *J* = 5.1 Hz).

**<sup>19</sup>F NMR** (376 MHz, CDCl<sub>3</sub>): δ -218.78 (tt, *J* = 47.4, 25.7 Hz).

**HRMS** ESI (m/z): [M+Na]<sup>+</sup> calcd. for C<sub>17</sub>H<sub>17</sub>FO<sub>2</sub>Na: 295.1105, found: 295.1113.

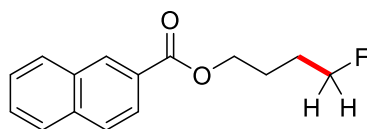

The product **15** was purified with silica gel chromatography (PE/EA = 10:1) as a colorless oil (42.8 mg, 87% yield).

**<sup>1</sup>H NMR** (500 MHz, CDCl<sub>3</sub>): δ 8.93 (d, *J* = 8.7 Hz, 1H), 8.19 (dd, *J* = 7.3, 1.1 Hz, 1H), 8.03 (d, *J* = 8.2 Hz, 1H), 7.89 (d, *J* = 8.1 Hz, 1H), 7.63 (m, 1H), 7.58 – 7.46 (m, 2H), 4.56 (dt, *J* = 47.6, 5.6 Hz, 2H), 4.44 (t, *J* = 6.1 Hz, 2H), 2.04 – 1.85 (m, 4H).

**<sup>13</sup>C NMR** (126 MHz, CDCl<sub>3</sub>): 166.88, 135.66, 132.61, 131.14, 129.49, 128.40, 128.31, 127.91, 127.62, 126.80, 125.32, 83.71 (d, *J* = 165.1 Hz), 64.69, 27.38 (d, *J* = 20.1 Hz), 24.99 (d, *J* = 5.1 Hz).

**<sup>19</sup>F NMR** (376 MHz, CDCl<sub>3</sub>): δ -218.79 (tt, *J* = 47.5, 26.1 Hz).

**HRMS** ESI (m/z): [M+Na]<sup>+</sup> calcd. for C<sub>15</sub>H<sub>15</sub>FO<sub>2</sub>Na: 269.0954, found: 269.0951.

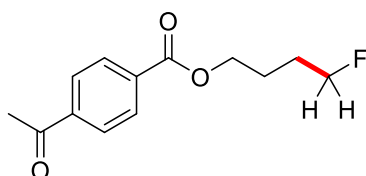

The product **16** was purified with silica gel chromatography (PE/EA = 10:1) as a colorless oil (35.7 mg, 75% yield).

**<sup>1</sup>H NMR** (400 MHz, CDCl<sub>3</sub>): δ 8.13 (d, *J* = 8.4 Hz, 2H), 8.02 (d, *J* = 8.4 Hz, 2H), 4.54 (dt, *J* = 47.5, 5.6 Hz, 2H), 4.41 (t, *J* = 6.2 Hz, 2H), 2.65 (s, 3H), 2.01 – 1.79 (m, 4H).

**<sup>13</sup>C NMR** (101 MHz, CDCl<sub>3</sub>): δ 197.64, 165.79, 140.35, 134.11, 129.90, 128.33, 83.58 (d, *J* = 165.2 Hz), 64.99, 27.26 (d, *J* = 20.1 Hz), 27.00, 24.88 (d, *J* = 4.9 Hz).

**<sup>19</sup>F NMR** (376 MHz, CDCl<sub>3</sub>): δ -218.91 (tt, *J* = 46.8, 25.4 Hz).

**HRMS** ESI (m/z): [M+H]<sup>+</sup> calcd. for C<sub>13</sub>H<sub>16</sub>FO<sub>3</sub>: 239.1078, found: 239.1074.

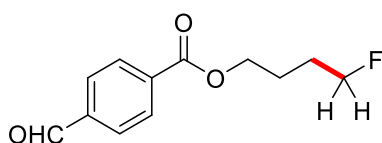

The product **17** was purified with silica gel chromatography (PE/EA = 6:1) as a colorless oil (30.5 mg, 68% yield).

**<sup>1</sup>H NMR** (400 MHz, CDCl<sub>3</sub>): δ 10.11 (s, 1H), 8.27 – 8.15 (m, 2H), 7.96 (d, *J* = 8.1 Hz, 2H), 4.54 (dt, *J* = 47.6, 5.7 Hz, 2H), 4.42 (t, *J* = 6.3 Hz, 2H), 2.04 – 1.75 (m, 4H).

**<sup>13</sup>C NMR** (126 MHz, CDCl<sub>3</sub>): δ 191.81, 165.68, 139.30, 135.35, 130.30, 129.68, 83.59 (d, *J* = 165.3 Hz), 65.19, 27.28 (d, *J* = 20.2 Hz), 24.91 (d, *J* = 5.1 Hz).

**<sup>19</sup>F NMR** (376 MHz, CDCl<sub>3</sub>): δ -218.89 (tt, *J* = 51.1, 25.9 Hz).

**HRMS** ESI (m/z): [M+H]<sup>+</sup> calcd. for C<sub>12</sub>H<sub>14</sub>FO<sub>3</sub>: 225.0921, found: 225.0925.

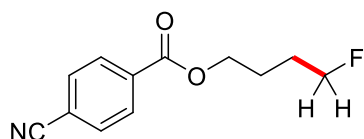

The product **18** was purified with silica gel chromatography (PE/EA = 6:1) as a colorless oil (31.0 mg, 70% yield).

**<sup>1</sup>H NMR** (400 MHz, CDCl<sub>3</sub>): δ 8.14 (d, *J* = 8.4 Hz, 2H), 7.76 (d, *J* = 8.4 Hz, 2H), 4.53 (dt, *J* = 47.5, 5.6 Hz, 2H), 4.42 (t, *J* = 6.2 Hz, 2H), 1.99 – 1.80 (m, 4H).

**<sup>13</sup>C NMR** (126 MHz, CDCl<sub>3</sub>): δ 165.03, 134.19, 132.38, 130.20, 118.10, 116.57, 83.53 (d, *J* = 165.5 Hz), 65.39, 27.25 (d, *J* = 20.2 Hz), 24.91 (d, *J* = 4.8 Hz).

**<sup>19</sup>F NMR** (376 MHz, CDCl<sub>3</sub>): δ -219.00 (tt, *J* = 47.2, 26.0 Hz).

**HRMS** ESI (m/z): [M+Na]<sup>+</sup> calcd. for C<sub>12</sub>H<sub>12</sub>FO<sub>2</sub>NNa: 244.0744, found: 244.0737.

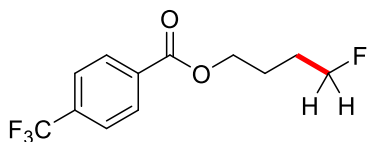

The product **19** was purified with silica gel chromatography (PE/EA = 8:1) as a colorless oil (38.6 mg, 73% yield).

**<sup>1</sup>H NMR** (400 MHz, CDCl<sub>3</sub>): δ 8.16 (d, *J* = 8.1 Hz, 2H), 7.71 (d, *J* = 8.2 Hz, 2H), 4.53 (dt, *J* = 47.6, 5.7 Hz, 2H), 4.41 (t, *J* = 6.2 Hz, 2H), 2.01 – 1.82 (m, 4H).

**<sup>13</sup>C NMR** (126 MHz, CDCl<sub>3</sub>): δ 165.47, 134.58 (q, *J* = 32.7 Hz), 133.58, 130.09, 125.56 (q, *J* = 3.7 Hz), 123.76 (q, *J* = 272.6 Hz), 83.59 (d, *J* = 165.3 Hz), 65.12, 27.28 (d, *J* = 20.1 Hz), 24.91 (d, *J* = 4.9 Hz).

**<sup>19</sup>F NMR** (376 MHz, CDCl<sub>3</sub>): δ -63.11 (s, 3F), -218.98 (tt, *J* = 47.4, 25.5 Hz, 1F).

**HRMS** ESI (m/z): [M+H]<sup>+</sup> calcd. for C<sub>12</sub>H<sub>13</sub>F<sub>4</sub>O<sub>2</sub>: 265.0846, found: 265.0840.

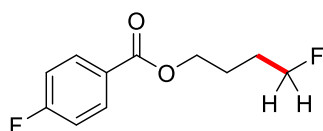

The product **20** was purified with silica gel chromatography (PE/EA = 12:1) as a colorless oil (31.3 mg, 73% yield).

**<sup>1</sup>H NMR** (400 MHz, CDCl<sub>3</sub>): δ 8.27 – 7.65 (m, 2H), 7.17 – 7.04 (m, 2H), 4.52 (dt, *J* = 47.4, 5.6 Hz, 2H), 4.37 (t, *J* = 6.3 Hz, 2H), 1.98 – 1.78 (m, 4H).

**<sup>13</sup>C NMR** (126 MHz, CDCl<sub>3</sub>): δ 165.91 (d, *J* = 253.8 Hz), 165.73, 132.22 (d, *J* = 9.4 Hz), 126.64 (d, *J* = 2.9 Hz), 115.67 (d, *J* = 22.0 Hz), 83.62 (d, *J* = 165.3 Hz), 64.67, 27.31 (d, *J* = 20.1 Hz), 24.93 (d, *J* = 5.0 Hz).

**<sup>19</sup>F NMR** (376 MHz, CDCl<sub>3</sub>): δ -105.71 (tt, *J* = 8.4, 5.5 Hz, 1F), -218.87 (dt, *J* = 47.3, 25.7 Hz, 1F)

**HRMS** ESI (*m/z*): [M+Na]<sup>+</sup> calcd. for C<sub>11</sub>H<sub>12</sub>F<sub>2</sub>O<sub>2</sub>Na: 237.0698, found: 237.0687.

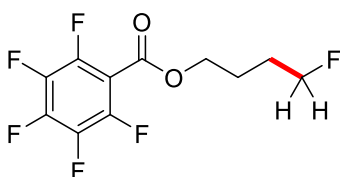

The product **21** was purified with silica gel chromatography (PE/EA = 10:1) as a colorless oil (34.3 mg, 60% yield).

**<sup>1</sup>H NMR** (500 MHz, CDCl<sub>3</sub>): δ 4.57 (t, *J* = 5.5 Hz, 1H), 4.45 (td, *J* = 6.1, 5.9, 4.6 Hz, 3H), 1.97 – 1.75 (m, 4H).

**<sup>13</sup>C NMR** (101 MHz, CDCl<sub>3</sub>): δ 159.18, 83.46 (d, *J* = 165.3 Hz), 66.41, 27.06 (d, *J* = 20.2 Hz), 24.74 (d, *J* = 4.7 Hz).

**<sup>19</sup>F NMR** (376 MHz, CDCl<sub>3</sub>): δ -136.25 – -141.78 (m, 2F), -148.55 (tt, *J* = 21.0, 4.8 Hz, 1F), -160.20 – -160.48 (m, 2F), -219.30 (tt, *J* = 47.2, 26.4 Hz, 1F).

**HRMS** ESI (*m/z*): [M+H]<sup>+</sup> calcd. for C<sub>11</sub>H<sub>9</sub>F<sub>6</sub>O<sub>2</sub>: 287.0501, found: 287.0512.

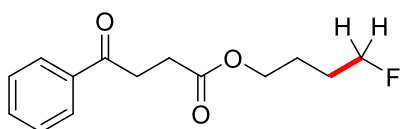

The product **22** was purified with silica gel chromatography (PE/EA = 10:1) as a colorless oil (37.8 mg, 75% yield).

**<sup>1</sup>H NMR** (400 MHz, CDCl<sub>3</sub>): δ 8.01 – 7.93 (m, 2H), 7.63 – 7.54 (m, 1H), 7.52 – 7.39 (m, 2H), 4.47 (dt, *J* = 47.2, 5.7 Hz, 2H), 4.16 (t, *J* = 6.2 Hz, 2H), 3.33 (t, *J* = 6.6 Hz, 2H), 2.77 (t, *J* = 6.6 Hz, 2H), 1.83 – 1.67 (m, 4H).

**<sup>13</sup>C NMR** (101 MHz, CDCl<sub>3</sub>): δ 198.23, 173.05, 136.65, 133.40, 128.77, 128.17, 83.67 (d, *J* = 164.8 Hz), 64.25, 33.49, 28.35, 27.17 (d, *J* = 20.0 Hz), 24.77 (d, *J* = 5.1 Hz).

**<sup>19</sup>F NMR** (376 MHz, CDCl<sub>3</sub>): δ -218.89 (tt, *J* = 47.4, 26.3 Hz).

**HRMS** ESI (m/z): [M+Na]<sup>+</sup> calcd. for C<sub>14</sub>H<sub>17</sub>FO<sub>3</sub>Na: 275.1054, found: 275.1065.

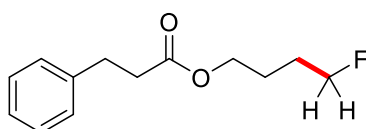

The product **23** was purified with silica gel chromatography (PE/EA = 20:1) as a colorless oil (43.5 mg, 60% yield).

**<sup>1</sup>H NMR** (400 MHz, CDCl<sub>3</sub>): δ 7.35 – 7.25 (m, 2H), 7.24 – 7.15 (m, 3H), 4.44 (dt, *J* = 47.6, 5.2 Hz, 2H), 4.11 (t, *J* = 6.1 Hz, 2H), 2.95 (t, *J* = 7.8 Hz, 2H), 2.64 (t, *J* = 7.8 Hz, 2H), 1.83 – 1.62 (m, 4H).

**<sup>13</sup>C NMR** (126 MHz, CDCl<sub>3</sub>): δ 173.05, 140.56, 128.62, 128.41, 126.39, 83.63 (d, *J* = 165.0 Hz), 64.00, 35.99, 31.09, 27.11 (d, *J* = 20.0 Hz), 24.74 (d, *J* = 5.0 Hz).

**<sup>19</sup>F NMR** (376 MHz, CDCl<sub>3</sub>): δ -218.86 (tt, *J* = 47.8, 26.1 Hz).

**HRMS** ESI (m/z): [M+H]<sup>+</sup> calcd. for C<sub>13</sub>H<sub>17</sub>FO<sub>2</sub>Na: 247.1105 found: 247.1108.

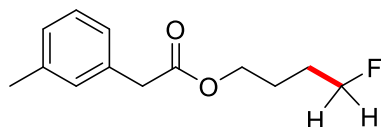

The product **24** was purified with silica gel chromatography (PE/EA = 12:1) as a colorless oil (29.2 mg, 65% yield).

**<sup>1</sup>H NMR** (400 MHz, CDCl<sub>3</sub>): δ 7.20 (s, 1H), 7.18 (m, 3H), 4.42 (dt, *J* = 47.5, 5.4 Hz, 2H), 4.13 (t, *J* = 6.2 Hz, 2H), 3.64 (s, 2H), 2.32 (s, 3H), 1.94 – 1.62 (m, 4H).

**<sup>13</sup>C NMR** (101 MHz, CDCl<sub>3</sub>): δ 171.64, 136.88, 132.86, 130.45, 130.23, 127.52, 126.25, 83.60 (d, *J* = 165.0 Hz), 64.37, 39.34, 27.09 (d, *J* = 20.0 Hz), 24.70 (d, *J* = 5.1 Hz), 19.74.

**<sup>19</sup>F NMR** (376 MHz, CDCl<sub>3</sub>): δ -218.83 (tt, *J* = 47.3, 25.7 Hz).

**<sup>1</sup>H NMR** ESI (m/z): [M+Na]<sup>+</sup> calcd. for C<sub>13</sub>H<sub>17</sub>FO<sub>2</sub>Na: 247.1105, found: 247.1103.

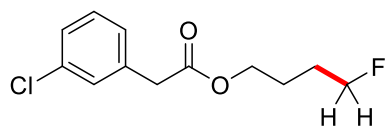

The product **25** was purified with silica gel chromatography (PE/EA = 10:1) as a colorless oil (34.3 mg, 70% yield).

**<sup>1</sup>H NMR** (400 MHz, CDCl<sub>3</sub>): δ 7.28 (s, 1H), 7.26 (d, *J* = 1.0 Hz, 1H), 7.25 (d, *J* = 1.3 Hz, 1H), 7.16 (m, 1H), 4.44 (dt, *J* = 47.3, 5.6 Hz, 2H), 4.15 (t, *J* = 6.2 Hz, 2H), 3.60 (s, 2H), 1.81 – 1.64 (m, 4H).

**<sup>13</sup>C NMR** (101 MHz, CDCl<sub>3</sub>): δ 171.06, 135.92, 134.39, 129.91, 129.54, 127.60, 127.47, 83.57 (d, *J* = 165.0 Hz), 64.64, 41.03, 27.07 (d, *J* = 20.1 Hz), 24.70 (d, *J* = 5.0 Hz).

**<sup>19</sup>F NMR** (376 MHz, CDCl<sub>3</sub>): δ -218.89 (tt, *J* = 47.5, 26.1 Hz).

**<sup>1</sup>H NMR** ESI (m/z): [M+Na]<sup>+</sup> calcd. for C<sub>12</sub>H<sub>14</sub>ClFO<sub>2</sub>Na: 267.0559, found: 267.0557.

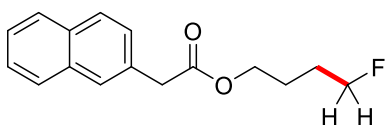

The product **26** was purified with silica gel chromatography (PE/EA = 10:1) as a colorless oil (33.8 mg, 65% yield).

**<sup>1</sup>H NMR** (400 MHz, CDCl<sub>3</sub>): δ 7.99 (d, *J* = 8.5 Hz, 1H), 7.86 (dd, *J* = 8.2, 1.4 Hz, 1H), 7.79 (dd, *J* = 7.6, 2.1 Hz, 1H), 7.58 – 7.44 (m, 2H), 7.47 – 7.37 (m, 2H), 4.33 (dt, *J* = 47.5, 5.8 Hz, 2H), 4.12 (t, *J* = 6.3 Hz, 2H), 4.07 (s, 2H), 1.76 – 1.50 (m, 4H).

**<sup>13</sup>C NMR** (126 MHz, CDCl<sub>3</sub>): δ 171.69, 133.89, 132.15, 130.67, 128.85, 128.18, 128.10, 126.44, 125.90, 125.60, 123.86, 83.51 (d, *J* = 165.0 Hz), 64.46, 39.39, 26.99 (d, *J* = 20.0 Hz), 24.63 (d, *J* = 5.1 Hz).

**<sup>19</sup>F NMR** (376 MHz, CDCl<sub>3</sub>): δ -218.88 (tt, *J* = 47.5, 25.7 Hz).

**<sup>1</sup>H NMR** ESI (m/z): [M+H]<sup>+</sup> calcd. for C<sub>16</sub>H<sub>18</sub>FO<sub>2</sub>: 261.1285, found: 261.1288.

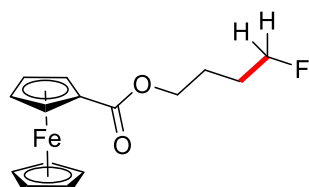

The product **27** was purified with silica gel chromatography (PE/EA = 3:1) as a red oil (47.4 mg, 78% yield).

**<sup>1</sup>H NMR** (500 MHz, CDCl<sub>3</sub>): δ 4.81 (t, *J* = 1.9 Hz, 2H), 4.54 (dt, *J* = 47.0, 5.2 Hz, 2H), 4.43 – 4.36 (m, 2H), 4.27 (t, *J* = 5.9 Hz, 2H), 4.20 (s, 5H), 1.95 – 1.76 (m, 4H).

**<sup>13</sup>C NMR** (126 MHz, CDCl<sub>3</sub>): 171.84, 83.72 (d, *J* = 165.1 Hz), 71.30, 71.43, 70.25, 69.87, 63.77, 27.39 (d, *J* = 20.1 Hz), 25.09 (d, *J* = 5.1 Hz).

**<sup>19</sup>F NMR** (376 MHz, CDCl<sub>3</sub>): δ -218.60 (tt, *J* = 47.2, 25.9 Hz).

**HRMS** ESI (m/z): [M+Na]<sup>+</sup> calcd. for C<sub>15</sub>H<sub>17</sub>FO<sub>2</sub>FeNa: 327.0454, found: 327.0455.

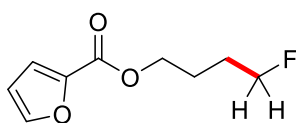

The product **28** was purified with silica gel chromatography (PE/EA = 5:1) as a colorless oil (20.5 mg, 55% yield).

**<sup>1</sup>H NMR** (500 MHz, CDCl<sub>3</sub>): δ 7.57 (dd, *J* = 1.7, 0.8 Hz, 1H), 7.17 (dd, *J* = 3.5, 0.8 Hz, 1H), 6.51 (dd, *J* = 3.5, 1.7 Hz, 1H), 4.50 (dt, *J* = 47.3, 5.7 Hz, 2H), 4.35 (t, *J* = 6.3 Hz, 2H), 1.94 – 1.77 (m, 4H).

**<sup>13</sup>C NMR** (126 MHz, CDCl<sub>3</sub>): δ 158.86, 146.46, 144.79, 118.03, 111.97, 83.60 (d, *J* = 165.1 Hz), 64.47, 27.19 (d, *J* = 20.1 Hz), 24.89 (d, *J* = 5.3 Hz).

**<sup>19</sup>F NMR** (376 MHz, CDCl<sub>3</sub>): δ -218.88 (tt, *J* = 47.2, 25.2 Hz).

**HRMS** ESI (m/z): [M+Na]<sup>+</sup> calcd. for C<sub>9</sub>H<sub>11</sub>FO<sub>3</sub>Na: 209.0584, found: 209.0589.

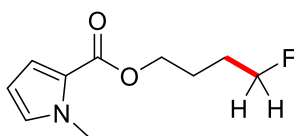

The product **29** was purified with silica gel chromatography (PE/EA = 5:1) as a colorless oil (27.9 mg, 70% yield).

**<sup>1</sup>H NMR** (500 MHz, CDCl<sub>3</sub>): δ 6.94 (dd, *J* = 3.8, 1.6 Hz, 1H), 6.78 (t, *J* = 2.2 Hz, 1H), 6.11 (dd, *J* = 3.6, 2.7 Hz, 1H), 4.51 (dt, *J* = 47.2, 5.6 Hz, 2H), 4.27 (t, *J* = 6.0 Hz, 2H), 3.92 (s, 3H), 1.92 – 1.76 (m, 4H).

**<sup>13</sup>C NMR** (126 MHz, CDCl<sub>3</sub>): δ 161.42, 129.68, 122.62, 117.91, 107.98, 83.73 (d, *J* = 165.0 Hz), 63.32, 36.95, 27.38 (d, *J* = 20.2 Hz), 25.01 (d, *J* = 5.4 Hz).



**<sup>19</sup>F NMR** (376 MHz, CDCl<sub>3</sub>): δ -218.74 (tt, *J* = 46.7, 25.7 Hz).

**HRMS** ESI (m/z): [M+H]<sup>+</sup> calcd. for C<sub>10</sub>H<sub>14</sub>FNO<sub>2</sub>: 200.1081, found: 200.1085.

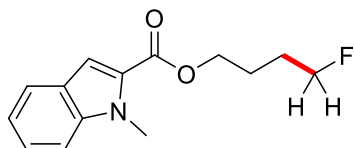

The product **30** was purified with silica gel chromatography (PE/EA = 8:1) as a colorless oil (31.4 mg, 63% yield).

**<sup>1</sup>H NMR** (400 MHz, CDCl<sub>3</sub>): δ 7.67 (dt, *J* = 8.1, 1.0 Hz, 1H), 7.41 – 7.33 (m, 2H), 7.29 (d, *J* = 0.9 Hz, 1H), 7.15 (m, 1H), 4.53 (dt, *J* = 47.3, 5.6 Hz, 2H), 4.36 (t, *J* = 6.2 Hz, 2H), 4.07 (s, 3H), 2.02 – 1.82 (m, 4H).

**<sup>13</sup>C NMR** (101 MHz, CDCl<sub>3</sub>): δ 162.30, 139.75, 127.79, 125.90, 125.13, 122.67, 120.69, 110.37, 110.27, 83.69 (d, *J* = 165.0 Hz), 64.05, 31.74, 27.33 (d, *J* = 20.1 Hz), 24.91 (d, *J* = 5.1 Hz).

**<sup>19</sup>F NMR** (376 MHz, CDCl<sub>3</sub>): δ -218.77 (tt, *J* = 47.5, 25.7 Hz).

**HRMS** ESI (m/z): [M+H]<sup>+</sup> calcd. for C<sub>14</sub>H<sub>17</sub>FNO<sub>2</sub>: 250.1238, found: 250.1243.

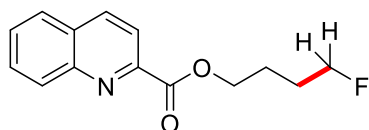

The product **31** was purified with silica gel chromatography (PE/EA = 5:1) as a colorless oil (29.7 mg, 60% yield).

**<sup>1</sup>H NMR** (400 MHz, CDCl<sub>3</sub>): δ 8.32 (m, 2H), 8.17 (d, *J* = 8.5 Hz, 1H), 7.89 (dd, *J* = 8.2, 1.5 Hz, 1H), 7.83 – 7.72 (m, 1H), 7.69 – 7.60 (m, 1H), 4.55 (dt, *J* = 47.4, 5.9 Hz, 2H), 4.55 (t, *J* = 6.5 Hz, 2H), 2.12 – 1.82 (m, 4H).

**<sup>13</sup>C NMR** (126 MHz, CDCl<sub>3</sub>): δ 165.47, 148.15, 147.75, 137.39, 130.92, 130.37, 129.41, 128.73, 127.64, 121.09, 83.64 (d, *J* = 165.3 Hz), 65.67, 27.21 (d, *J* = 20.0 Hz), 24.91 (d, *J* = 5.1 Hz).

**<sup>19</sup>F NMR** (376 MHz, CDCl<sub>3</sub>): δ -218.73 (tt, *J* = 47.1, 25.4 Hz).

**HRMS** ESI (m/z): [M+H]<sup>+</sup> calcd. for C<sub>14</sub>H<sub>15</sub>FNO<sub>2</sub>: 248.1081, found: 248.1078.

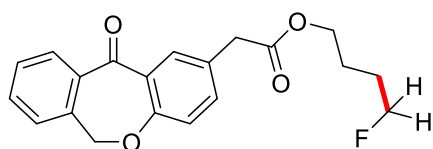

The product **32** was purified with silica gel chromatography (PE/EA = 5:1) as a colorless oil (47.9 mg, 70% yield).

**<sup>1</sup>H NMR** (400 MHz, CDCl<sub>3</sub>): δ 8.11 (d, *J* = 2.3 Hz, 1H), 7.88 (dd, *J* = 7.7, 1.0 Hz, 1H), 7.55 (td, *J* = 7.4, 1.3 Hz, 1H), 7.50 – 7.39 (m, 2H), 7.36 (d, *J* = 7.4 Hz, 1H), 7.02 (d, *J* = 8.4 Hz, 1H), 5.18 (s, 2H), 4.44 (dt, *J* = 47.4, 5.5 Hz, 2H), 4.14 (t, *J* = 6.2 Hz, 2H), 3.64 (s, 2H), 1.81 – 1.66 (m, 4H).

**<sup>13</sup>C NMR** (101 MHz, CDCl<sub>3</sub>): δ 190.89, 171.47, 160.56, 140.51, 136.39, 135.64, 132.87, 132.50, 129.55, 129.34, 127.90, 127.89, 125.22, 121.14, 83.52 (d, *J* = 165.1 Hz), 73.70, 64.50, 40.31, 27.08 (d, *J* = 20.0 Hz), 24.69 (d, *J* = 5.1 Hz).

**<sup>19</sup>F NMR** (376 MHz, CDCl<sub>3</sub>): δ -218.81 (tt, *J* = 47.3, 25.7 Hz).

**HRMS** ESI (m/z): [M+Na]<sup>+</sup> calcd. for C<sub>20</sub>H<sub>19</sub>FO<sub>4</sub>Na: 365.1165, found: 365.1160.

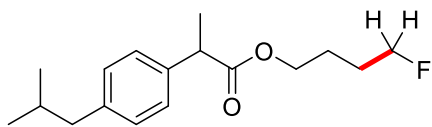

The product **33** was purified with silica gel chromatography (PE/EA = 5:1) as a colorless oil (39.2 mg, 70% yield).

**<sup>1</sup>H NMR** (400 MHz, CDCl<sub>3</sub>): δ 7.19 (d, *J* = 8.1 Hz, 2H), 7.09 (d, *J* = 8.1 Hz, 2H), 4.37 (dt, *J* = 47.5, 5.8 Hz, 2H), 4.10 (m, 2H), 3.68 (d, *J* = 7.2 Hz, 1H), 2.44 (d, *J* = 7.2 Hz, 2H), 1.90-1.78 (m, 1H), 1.74 – 1.57 (m, 4H), 1.49 (d, *J* = 7.2 Hz, 3H), 0.89 (d, *J* = 6.6 Hz, 6H).

**<sup>13</sup>C NMR** (126 MHz, CDCl<sub>3</sub>): δ 174.84, 140.66, 137.90, 129.43, 127.25, 83.53 (d, *J* = 165.0 Hz), 64.14, 45.29, 45.14, 30.31, 27.03 (d, *J* = 20.0 Hz), 24.68 (d, *J* = 5.2 Hz), 22.47, 18.47.

**<sup>19</sup>F NMR** (376 MHz, CDCl<sub>3</sub>): δ -218.87 (tt, *J* = 47.2, 25.7 Hz).

**HRMS** ESI (m/z): [M+H]<sup>+</sup> calcd. for C<sub>17</sub>H<sub>26</sub>FO<sub>2</sub>: 281.1911, found: 281.1913.

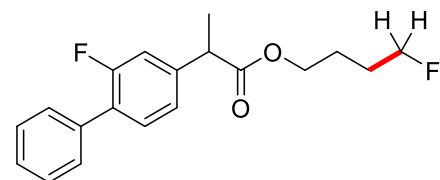

The product **34** was purified with silica gel chromatography (PE/EA = 8:1) as a colorless oil (42.7 mg, 67% yield).

**<sup>1</sup>H NMR** (400 MHz, CDCl<sub>3</sub>): δ 7.62 – 7.50 (m, 2H), 7.48 – 7.34 (m, 4H), 7.21 – 7.08 (m, 2H), 4.43 (dt, *J* = 47.4, 5.6 Hz, 2H), 4.16 (t, *J* = 6.3 Hz, 2H), 3.77 (q, *J* = 7.1 Hz, 1H), 1.82 – 1.71 (m, 3H), 1.69 – 1.63 (m, 1H), 1.55 (d, *J* = 7.2 Hz, 3H).

**<sup>13</sup>C NMR** (101 MHz, CDCl<sub>3</sub>): δ 174.07, 159.77 (d, *J* = 248.5 Hz), 141.93 (d, *J* = 7.7 Hz), 135.57, 130.91 (d, *J* = 4.0 Hz), 129.05 (d, *J* = 2.8 Hz), 128.57, 127.92 (d, *J* = 13.7 Hz), 127.79, 123.64 (d, *J* = 3.5 Hz), 115.32 (d, *J* = 23.8 Hz), 83.53 (d, *J* = 165.2 Hz), 64.52, 45.15 (d, *J* = 1.6 Hz), 27.05 (d, *J* = 19.9 Hz), 24.69 (d, *J* = 5.0 Hz), 18.40.

**<sup>19</sup>F NMR** (376 MHz, CDCl<sub>3</sub>): δ -117.63 – -117.73 (m), -218.84 (tt, *J* = 47.4, 25.9 Hz)..

**HRMS** ESI (m/z): [M+Na]<sup>+</sup> calcd. for C<sub>19</sub>H<sub>20</sub>F<sub>2</sub>O<sub>2</sub>Na: 341.1324 found:341.1331.

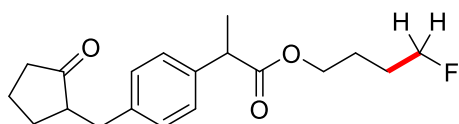

The product **35** was purified with silica gel chromatography (PE/EA = 6:1) as a colorless oil (46.8 mg, 73% yield).

**<sup>1</sup>H NMR** (400 MHz, CDCl<sub>3</sub>): δ 7.20 (d, *J* = 8.0 Hz, 2H), 7.12 (d, *J* = 8.0 Hz, 2H), 4.38 (dt, *J* = 47.5, 5.7 Hz, 2H), 4.10 (t, *J* = 6.2 Hz, 2H), 3.69 (q, *J* = 7.1 Hz, 1H), 3.12 (dd, *J* = 13.9, 4.1 Hz, 1H), 2.51 (dd, *J* = 13.9, 9.5 Hz, 1H), 2.38 – 2.29 (m, 2H), 2.16 – 2.01 (m, 2H), 1.99 – 1.92 (m, 1H), 1.76 – 1.65 (m, 4H), 1.65 – 1.58 (m, 2H), 1.48 (d, *J* = 7.2 Hz, 3H).

**<sup>13</sup>C NMR** (101 MHz, CDCl<sub>3</sub>): δ 220.34, 174.74, 139.02, 138.51, 129.25, 127.64, 83.56 (d, *J* = 165.2 Hz), 64.25, 51.11, 45.29, 38.32, 35.32, 29.34, 27.07 (d, *J* = 20.2 Hz), 24.69 (d, *J* = 5.3 Hz), 20.67, 18.51.

**<sup>19</sup>F NMR** (376 MHz, CDCl<sub>3</sub>): δ -218.75 (tt, *J* = 47.5, 25.6 Hz).

**HRMS** ESI (m/z): [M+Na]<sup>+</sup> calcd. for C<sub>19</sub>H<sub>25</sub>FO<sub>3</sub>Na: 343.1680, found: 343.1689.

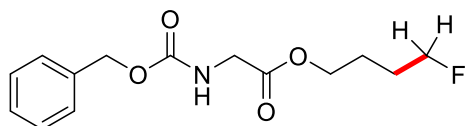

The product **36** was purified with silica gel chromatography (PE/EA = 8:1) as a colorless oil (46.5 mg, 82% yield).

**<sup>1</sup>H NMR** (400 MHz, CDCl<sub>3</sub>): δ 7.41 – 7.29 (m, 5H), 5.34 (s, 1H), 5.12 (s, 2H), 4.46 (dt, *J* = 47.2, 5.5 Hz, 2H), 4.19 (t, *J* = 6.1 Hz, 2H), 3.97 (d, *J* = 5.6 Hz, 2H), 1.97 – 1.62 (m, 4H).

**<sup>13</sup>C NMR** (126 MHz, CDCl<sub>3</sub>): δ 170.12, 156.37, 136.29, 128.62, 128.30, 128.21, 83.48 (d, *J* = 165.2 Hz), 67.18, 64.97, 42.81, 26.98 (d, *J* = 20.0 Hz), 24.68 (d, *J* = 4.8 Hz).

**<sup>19</sup>F NMR** (376 MHz, CDCl<sub>3</sub>): δ -218.96 (tt, *J* = 47.0, 26.8 Hz).

**HRMS** ESI (m/z): [M+Na]<sup>+</sup> calcd. for C<sub>14</sub>H<sub>18</sub>FNO<sub>4</sub>Na: 306.1112, found: 306.1111.

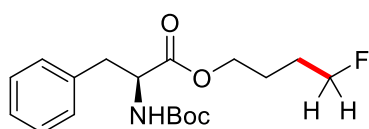

The product **37** was purified with silica gel chromatography (PE/EA = 8:1) as a colorless oil (50.2 mg, 74% yield).

**<sup>1</sup>H NMR** (500 MHz, CDCl<sub>3</sub>): δ 7.27 (m, 3H), 7.14 (d, *J* = 7.2 Hz, 2H), 5.00 (d, *J* = 8.0 Hz, 1H), 4.57 (dd, *J* = 14.1, 6.4 Hz, 1H), 4.42 (dt, *J* = 47.4, 5.6 Hz, 2H), 4.19 – 4.06 (m, 2H), 3.15 – 3.00 (m, 2H), 1.81 – 1.58 (m, 4H), 1.42 (s, 9H).

**<sup>13</sup>C NMR** (126 MHz, CDCl<sub>3</sub>): δ 172.10, 155.19, 136.16, 129.41, 128.67, 127.13, 83.48 (d, *J* = 165.3 Hz), 80.04, 64.83, 54.64, 38.62, 28.41, 27.00 (d, *J* = 20.1 Hz), 24.66 (d, *J* = 5.0 Hz).

**<sup>19</sup>F NMR** (376 MHz, CDCl<sub>3</sub>): δ -219.01 (tt, *J* = 47.1, 25.6 Hz).

**HRMS** ESI (m/z): [M+Na]<sup>+</sup> calcd. for C<sub>18</sub>H<sub>26</sub>FNO<sub>4</sub>Na: 362.1738, found: 362.1743.

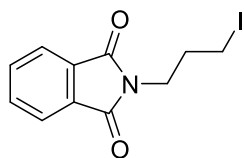

The product was purified with silica gel chromatography (PE/EA = 10:1) as a white solid (49.2 mg, 78% yield).

**<sup>1</sup>H NMR** (500 MHz, CDCl<sub>3</sub>): δ 7.85 (dd, *J* = 5.4, 3.1 Hz, 2H), 7.73 (dd, *J* = 5.5, 3.1 Hz, 2H), 3.78 (t, *J* = 6.8 Hz, 2H), 3.17 (t, *J* = 7.1 Hz, 2H), 2.30 – 2.22 (m, 2H).

**<sup>13</sup>C NMR** (126 MHz, CDCl<sub>3</sub>): δ 168.35, 134.18, 132.09, 123.45, 38.76, 32.68, 1.33.

## Mechanistic Studies

### In-situ generation of **1a**

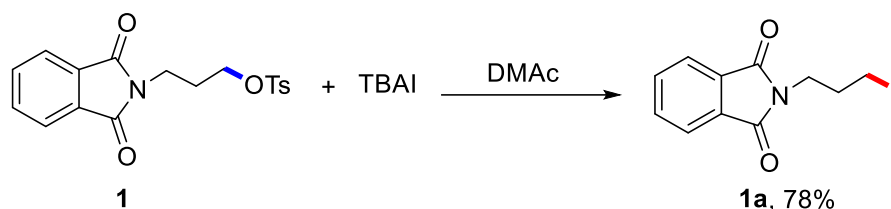

In glove box, alkyl tosylate **1** (1.0 equiv, 0.2 mmol, 72 mg), Tetrabutylammonium iodide (2.0 equiv, 0.4 mmol, 148 mg) were combined in a 5 mL oven-dried sealing tube. The vessel was evacuated and backfilled with N<sub>2</sub> (repeated for 3 times) and *N,N*-Dimethylacetamide (1.0 mL) were then added via syringe. The tube was sealed with a Teflon lined cap and heated in a preheated oil bath at 60 °C for 24 h. The reaction mixture was then cooled to room temperature, diluted with EtOAc (~20 mL). The filtrate was added brine (20 mL) and extracted with EtOAc (2×15 mL), the combined organic layer was dried over Na<sub>2</sub>SO<sub>4</sub>, filtrated and concentrated under vacuum. The residue was then purified by flash column chromatography to give product **1a** in 78% yield.

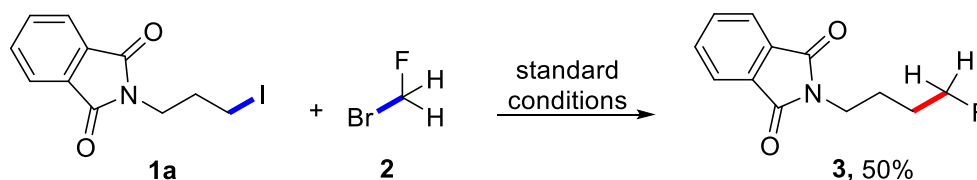

In glove box, NiCl<sub>2</sub>•DME (10 mol %, 0.02 mmol, 4.4 mg), **L**<sub>1</sub> (13.5 mol%, 0.027 mmol, 4.0 mg), Bis(neopentyl glycolato)diboron (2.0 equiv, 0.4 mmol, 90.4 mg), K<sub>2</sub>CO<sub>3</sub> (2.5 equiv, 0.5 mmol, 69 mg) were combined in a 5 mL oven-dried sealing tube. The vessel was evacuated and backfilled with N<sub>2</sub> (repeated for 3 times), and alkyl iodide **1a** (1.0 equiv, 0.2 mmol), **2** (2.0 equiv, 0.4 mmol) and *N,N*-Dimethylacetamide (1.0 mL) were then added via syringe. The tube was sealed with a Teflon lined cap and heated in a preheated oil bath at 60 °C for 24 h. The reaction mixture was then cooled to room temperature, diluted with EtOAc (~20 mL) and filtered through a pad of celite. The filtrate was added brine (20 mL) and extracted with EtOAc (2×15 mL), the combined organic layer was dried over Na<sub>2</sub>SO<sub>4</sub>, filtrated and concentrated under vacuum. The residue was then purified by flash column chromatography to give product **3** in 50% yield.

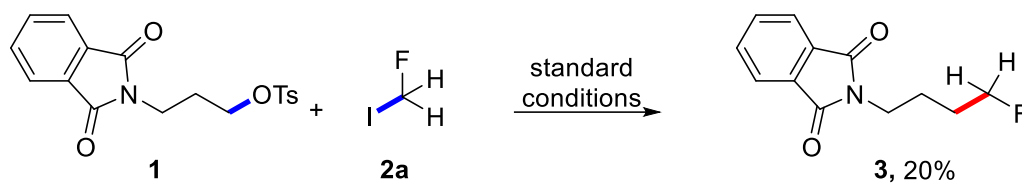

In glove box,  $\text{NiCl}_2 \cdot \text{DME}$  (10 mol%, 0.02 mmol, 4.4 mg), **L**<sub>1</sub> (13.5 mol%, 0.027 mmol, 4.0 mg), Bis(neopentyl glycolato)diboron (2.0 equiv, 0.4 mmol, 90.4 mg),  $\text{K}_2\text{CO}_3$  (2.5 equiv, 0.5 mmol, 69.0 mg) were combined in a 5 mL oven-dried sealing tube. The vessel was evacuated and backfilled with  $\text{N}_2$  (repeated for 3 times), and alkyl tosylate **1** (1.0 equiv, 0.2 mmol), **2a** (2.0 equiv, 0.4 mmol) and *N,N*-Dimethylacetamide (1.0 mL) were then added via syringe. The tube was sealed with a Teflon lined cap and heated in a preheated oil bath at 60 °C for 24 h. The reaction mixture was then cooled to room temperature, diluted with EtOAc (~20 mL) and filtered through a pad of celite. The filtrate was added brine (20 mL) and extracted with EtOAc (2×15 mL), the combined organic layer was dried over  $\text{Na}_2\text{SO}_4$ , filtrated and concentrated under vacuum. The residue was then purified by flash column chromatography to give product **3** in 20% yield.

### In-situ Suzuki process

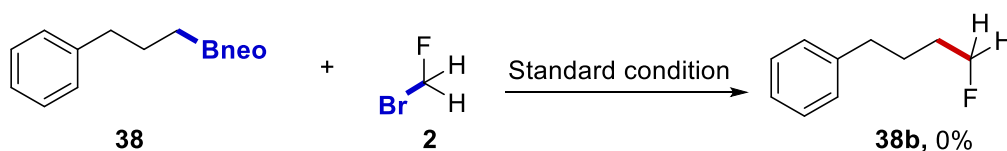

In glove box,  $\text{NiCl}_2 \cdot \text{DME}$  (10 mol%, 0.02 mmol, 4.4 mg), **L**<sub>1</sub> (13.5 mol%, 0.027 mmol, 4.0 mg), Bis(neopentyl glycolato)diboron (2.0 equiv, 0.4 mmol, 90.4 mg),  $\text{K}_2\text{CO}_3$  (2.5 equiv, 0.5 mmol, 69 mg) and Tetrabutylammonium iodide (2.0 equiv, 0.4 mmol, 148 mg) were combined in a 5 mL oven-dried sealing tube. The vessel was evacuated and backfilled with  $\text{N}_2$  (repeated for 3 times), and alkyl-Bneo **38** (1.0 equiv, 0.2 mmol), **2** (2.0 equiv, 0.4 mmol) and *N,N*-Dimethylacetamide (1.0 mL) were then added via syringe. The tube was sealed with a Teflon lined cap and heated in a preheated oil bath at 60 °C for 24 h. The reaction mixture was then cooled to room temperature. No product **38b** was detected by crude  $^{19}\text{F}$  NMR.

## Radical Trapping Experiment with TEMPO.

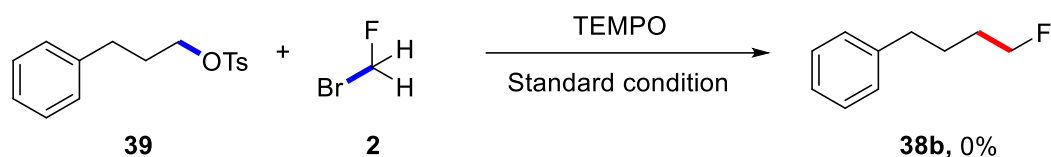

In glove box, NiCl<sub>2</sub>•DME (10 mol%, 0.02 mmol, 4.4 mg), L<sub>1</sub> (13.5 mol%, 0.027 mmol, 4.0 mg), Bis(neopentyl glycolato)diboron (2.0 equiv, 0.4 mmol, 90.4 mg), Tetrabutylammonium iodide (2.0 equiv, 0.4 mmol, 148 mg) and K<sub>2</sub>CO<sub>3</sub> (2.5 equiv, 0.5 mmol, 69 mg) were combined in a 5 mL oven-dried sealing tube. The vessel was evacuated and backfilled with N<sub>2</sub> (repeated for 3 times), radical inhibitors (TEMPO, 2.0 equiv, 0.4 mmol), alkyl tosylate **39** (1.0 equiv, 0.2 mmol), **2** (2.0 equiv, 0.4 mmol) and *N,N*-Dimethylacetamide (1.0 mL) were then added via syringe. The tube was sealed with a Teflon lined cap and heated in a preheated oil bath at 60 °C for 24 h. The reaction mixture was then cooled to room temperature. No product **38b** was detected by crude <sup>19</sup>F NMR.

## Radical Clock Experiment:

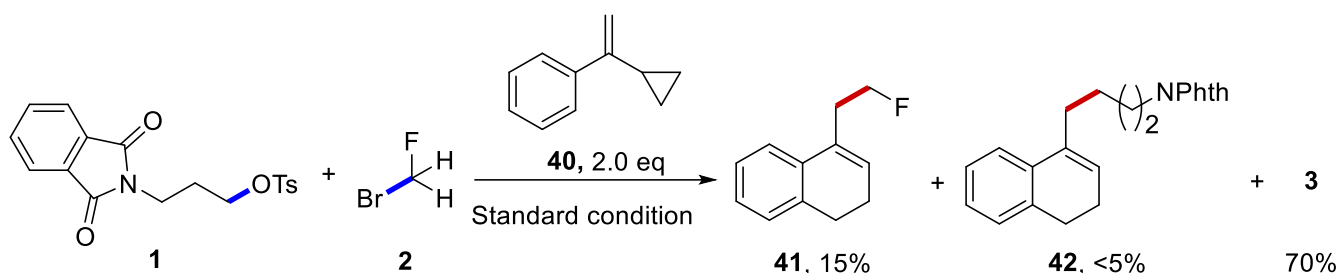

In glove box, NiCl<sub>2</sub>•DME (10 mol%, 0.02 mmol, 4.4 mg), L<sub>1</sub> (13.5 mol%, 0.027 mmol, 4.0 mg), Bis(neopentyl glycolato)diboron (2.0 equiv, 0.4 mmol, 90.4 mg), K<sub>2</sub>CO<sub>3</sub> (2.5 equiv, 0.5 mmol, 69 mg) and Tetrabutylammonium iodide (2.0 equiv, 0.4 mmol, 148 mg) were combined in a 5 mL oven-dried sealing tube. The vessel was evacuated and backfilled with N<sub>2</sub> (repeated for 3 times), and alkyl tosylate **1** (1.0 equiv, 0.2 mmol), **2** (2.0 equiv, 0.4 mmol) and *N,N*-Dimethylacetamide (1.0 mL) were then added via syringe. The tube was sealed with a Teflon lined cap and heated in a preheated oil bath at 60 °C for 24 h. The reaction mixture was then cooled to room temperature, diluted with EtOAc (~20 mL) and filtered through a pad of celite. The filtrate was added brine (20 mL) and extracted with EtOAc (2×15 mL), the combined organic layer was dried over Na<sub>2</sub>SO<sub>4</sub>, filtrated and concentrated under vacuum. The residue was then purified by flash column chromatography to give product **3** in 70% yield. The yield of product **41** was determined by crude <sup>19</sup>F NMR. Note: The structures of **41** and **42** were

determined by GC-MS and HRMS. Compound **41**: HRMS ESI (m/z):  $[M+H]^+$  calcd. for  $C_{12}H_{14}F$ : 177.1074, found: 177.1113. Compound **42**: HRMS ESI (m/z):  $[M+H]^+$  calcd. for  $C_{22}H_{21}NNaO_2^+$ : 354.1465, found: 354.1471.

### Large scale reaction:

In glove box,  $NiCl_2 \cdot DME$  (10 mol%, 0.5 mmol, 110 mg), **L1** (13.5 mol%, 0.675 mmol, 99 mg), Bis(neopentyl glycolato)diboron (2.0 equiv, 10 mmol, 2.3 g),  $K_2CO_3$  (2.5 equiv, 12.5 mmol, 1.7 g) and Tetrabutylammonium iodide (2.0 equiv, 10 mmol, 3.7 g) were combined in a 100 mL round-bottom flask. The vessel was evacuated and backfilled with  $N_2$  (repeated for 3 times), and alkyl tosylate **1** (1.0 equiv, 5 mmol), Bromofluoromethane **2** (2.0 equiv, 10 mmol dissolved in DMAc) and *N,N*-Dimethylacetamide (30 mL) were then added via syringe. The tube was sealed with a Teflon lined cap and heated in a preheated oil bath at 60 °C for 24 h. The reaction mixture was then cooled to room temperature, diluted with EtOAc (~20 mL) and filtered through a pad of celite. The filtrate was added brine (2×20 mL) and extracted with EtOAc (2×25 mL), the combined organic layer was dried over  $Na_2SO_4$ , filtrated and concentrated under vacuum. The residue was then purified by flash column chromatography to give desired product **3** as a colorless solid.

### Monofluoroalkylation of Alkyl Tosylate:

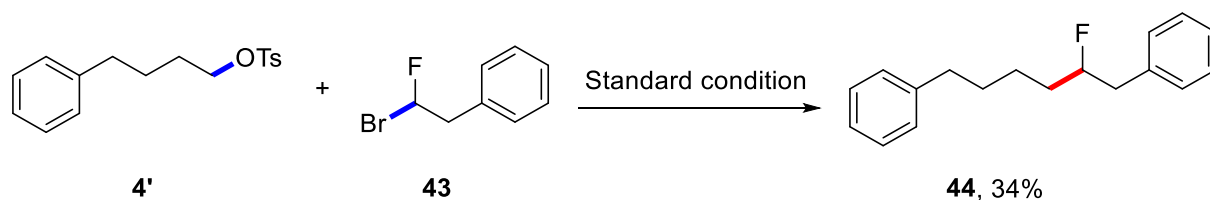

In glove box,  $NiCl_2 \cdot DME$  (10 mol%, 0.02 mmol, 4.4 mg), **L1** (13.5 mol%, 0.027 mmol, 4.0 mg), Bis(neopentyl glycolato)diboron (2.0 equiv, 0.4 mmol, 90.4 mg),  $K_2CO_3$  (2.5 equiv, 0.5 mmol, 69 mg) and Tetrabutylammonium iodide (2.0 equiv, 0.4 mmol, 148 mg) were combined in a 5 mL oven-dried sealing tube. The vessel was evacuated and backfilled with  $N_2$  (repeated for 3 times), and 4-phenylbutyl 4-methylbenzenesulfonate **4'** (1.0 equiv, 0.2 mmol), (2-bromo-2-fluoroethyl) benzene **43** (2.0 equiv, 0.4 mmol) and *N,N*-Dimethylacetamide (1.0 mL) were then added via syringe. The tube was sealed with a Teflon lined cap and heated in a preheated oil bath at 60 °C for 24 h. The reaction mixture was then cooled to room temperature, diluted with EtOAc (~20 mL) and filtered through a pad of celite. The filtrate was added brine (20 mL) and extracted with EtOAc (2×15 mL), the combined organic layer was dried over  $Na_2SO_4$ , filtrated and concentrated under vacuum. The product **44** was purified with silica gel chromatography (PE/EA = 100:1) as a colorless oil. (17.4mg, 34% yield). Note: The structures of



---

**44**<sup>5</sup> was known. Compound **44**: <sup>1</sup>H NMR (400 MHz, CDCl<sub>3</sub>): δ 7.34–7.25 (m, 5H), 7.23–7.12 (m, 5H), 4.78–4.54 (m, 1H), 3.03–2.74 (m, 2H), 2.60 (t, *J* = 7.6 Hz, 2H), 1.71–1.61 (m, 3H), 1.58–1.49 (m, 2H), 1.48–1.35 (m, 1H). <sup>13</sup>C NMR (101 MHz, CDCl<sub>3</sub>): δ 142.56, 137.52 (d, *J* = 4.8 Hz), 129.50, 128.56, 128.52, 128.43, 126.66, 125.84, 94.62 (d, *J* = 170.9 Hz), 41.80 (d, *J* = 21.6 Hz), 35.96, 34.64 (d, *J* = 20.8 Hz), 31.38, 24.94 (d, *J* = 4.1 Hz). <sup>19</sup>F NMR (376 MHz, CDCl<sub>3</sub>) δ -178.38–-178.76 (m).

## References:

1. H. Xu, C. Zhao, Q. Qian, W. Deng and H. Gong, *Chem. Sci.* **2013**, *4*, 4022-4029.
2. A. Joshi-Pangu, X. Ma, M. Diane, S. Iqbal, R. J. Kribs, R. Huang, C.-Y. Wang and M. R. Biscoe, *J. Org. Chem.* **2012**, *77*, 6629-6633.
3. T. W. Liwosz and S. R. Chemler, *Chem. Eur. J.* **2013**, *19*, 12771-12777.
4. X. Jiang, S. Sakthivel, K. Kulbitski, G. Nisnevich and M. Gandelman, *J. Am. Chem. Soc.* **2014**, *136*, 9548–9551.
5. J. Sheng, H.-Q. Ni, S.-X. Ni, Y. He, R. Cui, G.-X. Liao, K.-J. Bian, B.-B. Wu and X.-S. Wang, *Angew. Chem. Int. Ed.* **2021**, *60*, 15020–15027.

# NMR Spectra of Substrates (<sup>1</sup>H NMR, <sup>19</sup>F NMR, <sup>13</sup>C NMR)

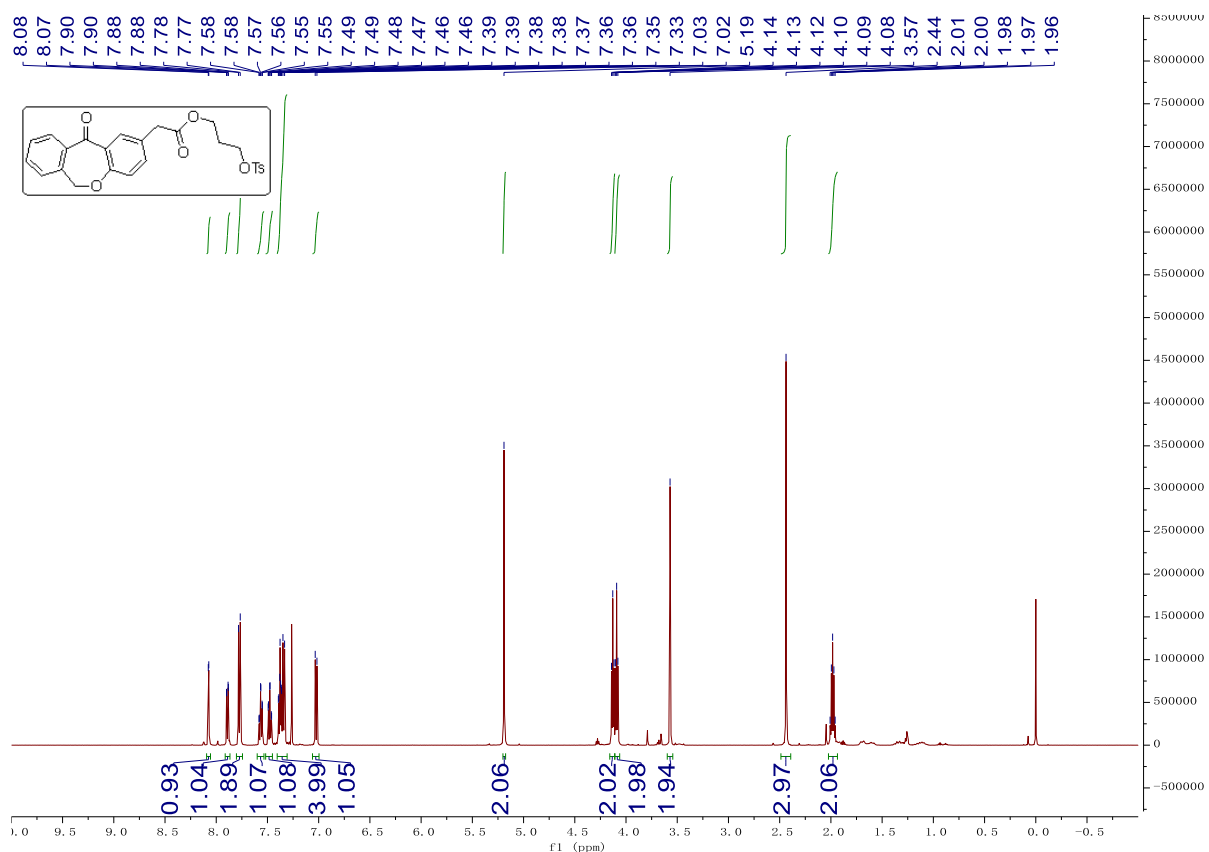

<sup>1</sup>H NMR Spectrum of 3-(tosyloxy)propyl 2-(11-oxo-6,11-dihydrodibenzo[b,e]oxepin-2-yl)acetate (CDCl<sub>3</sub>, 500 MHz)

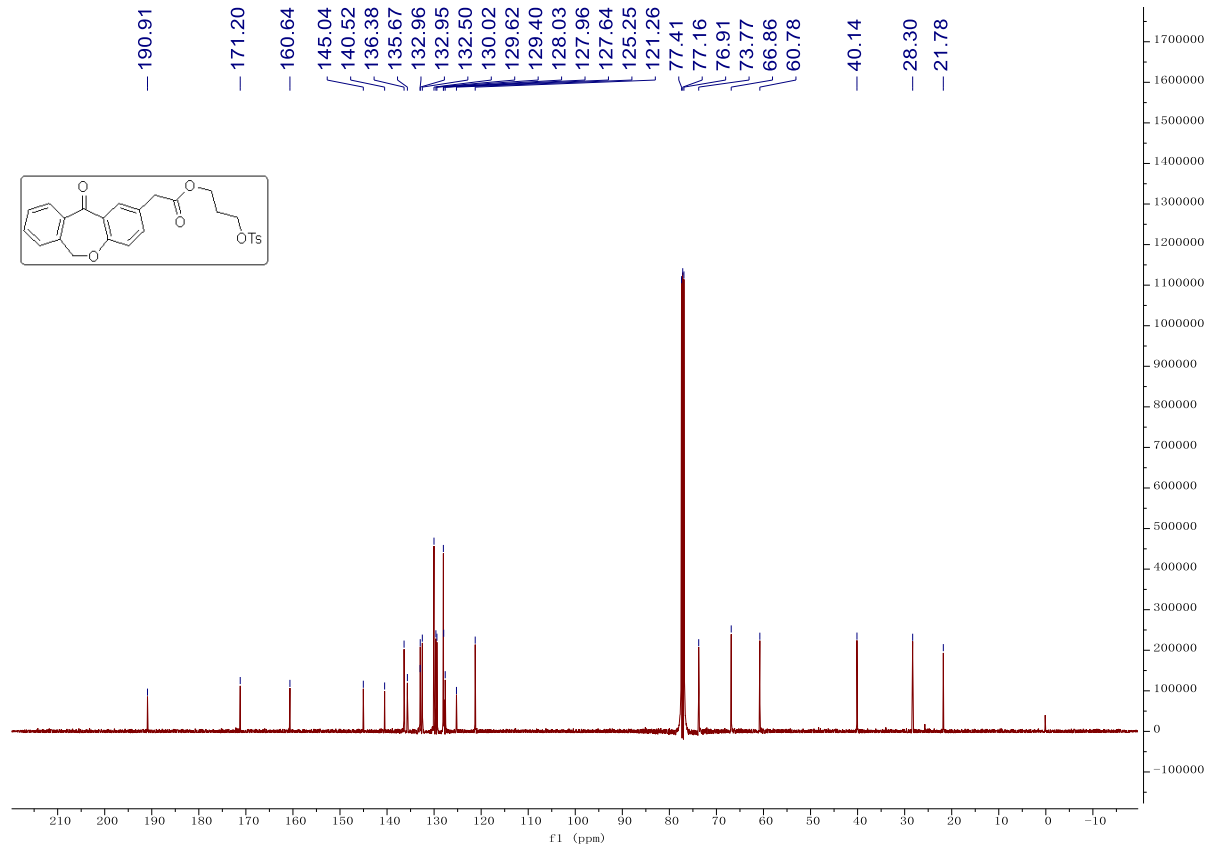

<sup>13</sup>C NMR Spectrum of 3-(tosyloxy)propyl 2-(11-oxo-6,11-dihydrodibenzo[b,e]oxepin-2-yl)acetate (CDCl<sub>3</sub>, 126 MHz)

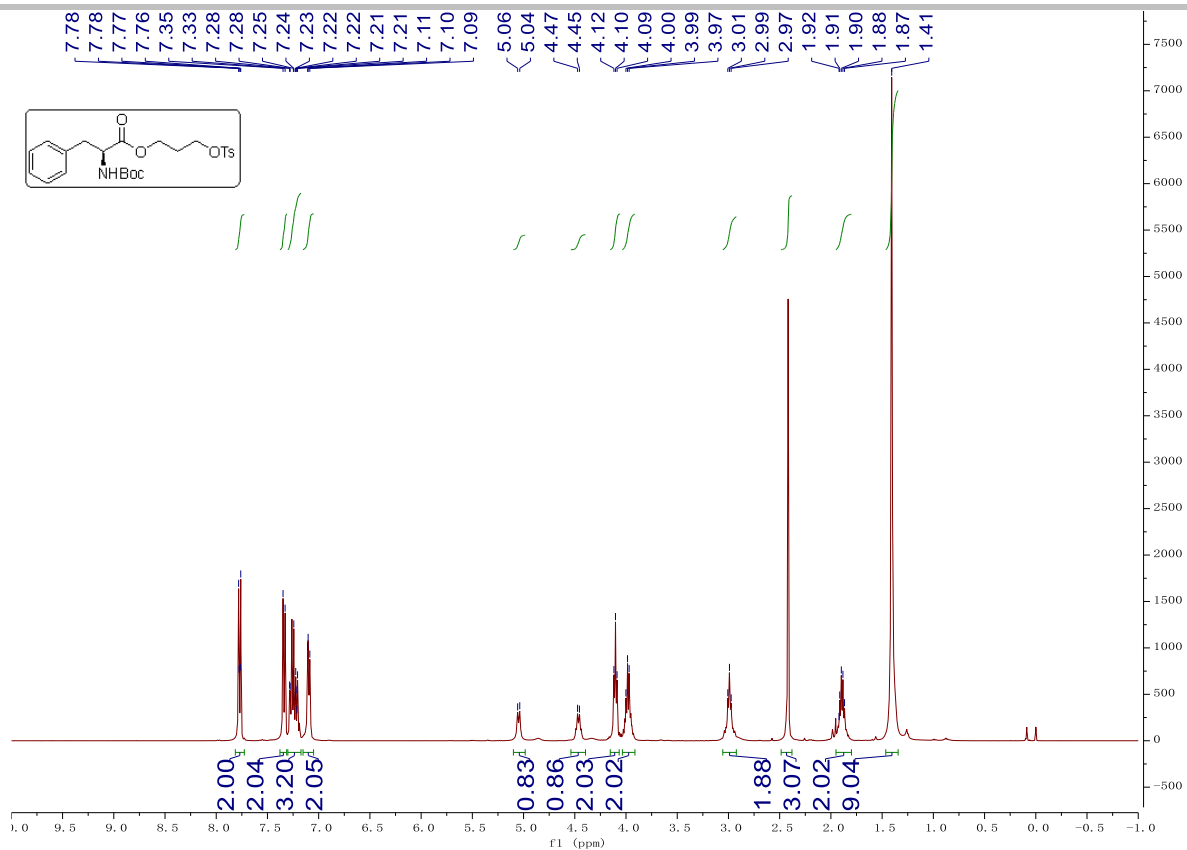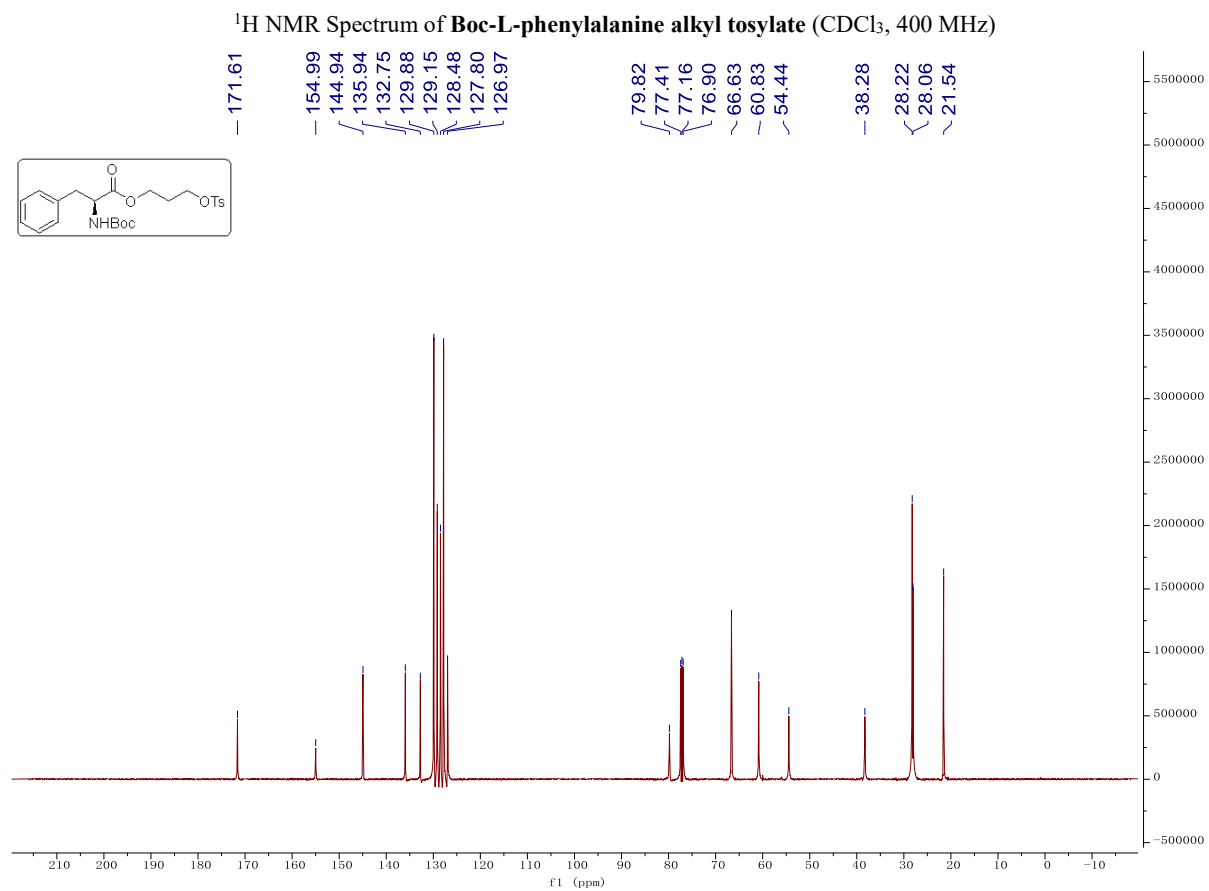

**<sup>13</sup>C NMR Spectrum of Boc-L-phenylalanine alkyl tosylate (CDCl<sub>3</sub>, 126 MHz)**

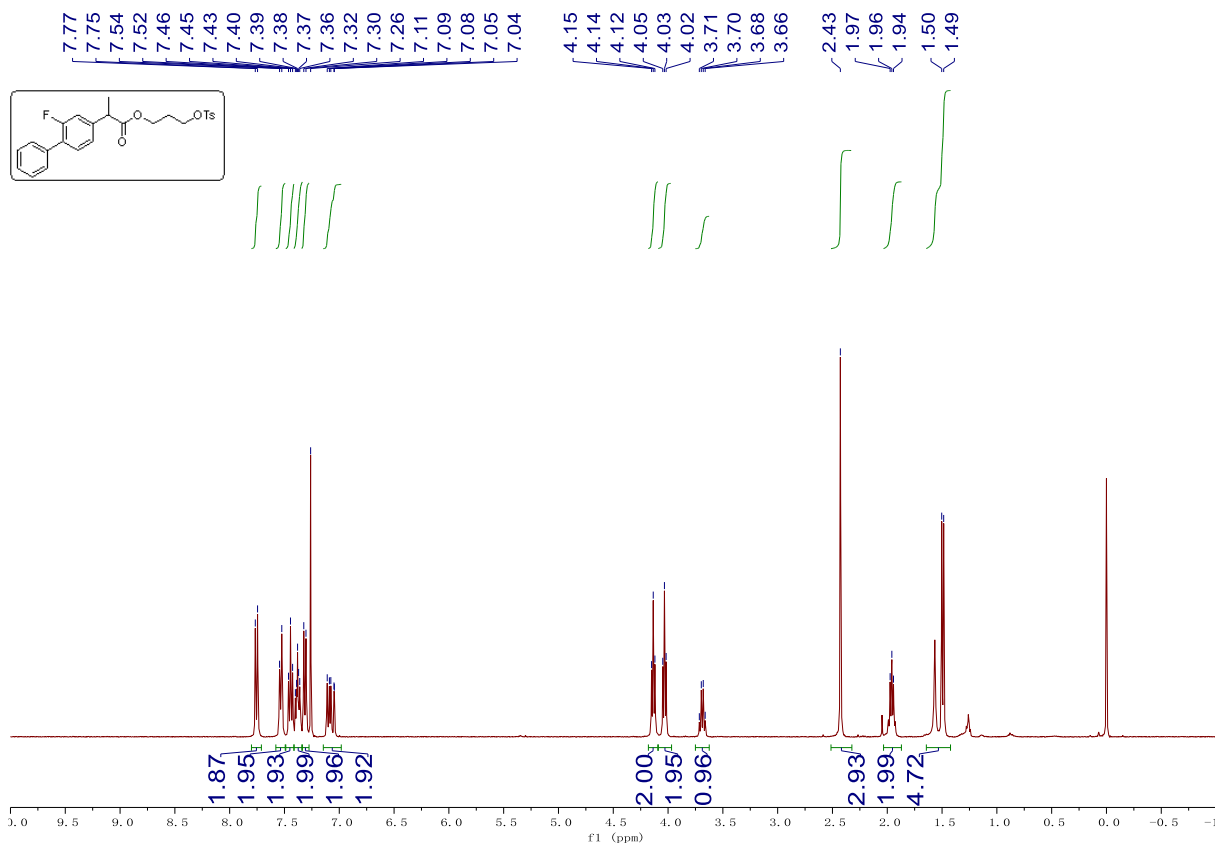

**<sup>1</sup>H NMR Spectrum of 3-(tosyloxy) propyl 2-(2-fluoro-[1,1'-biphenyl]-4-yl) propanoate (CDCl<sub>3</sub>, 400 MHz)**

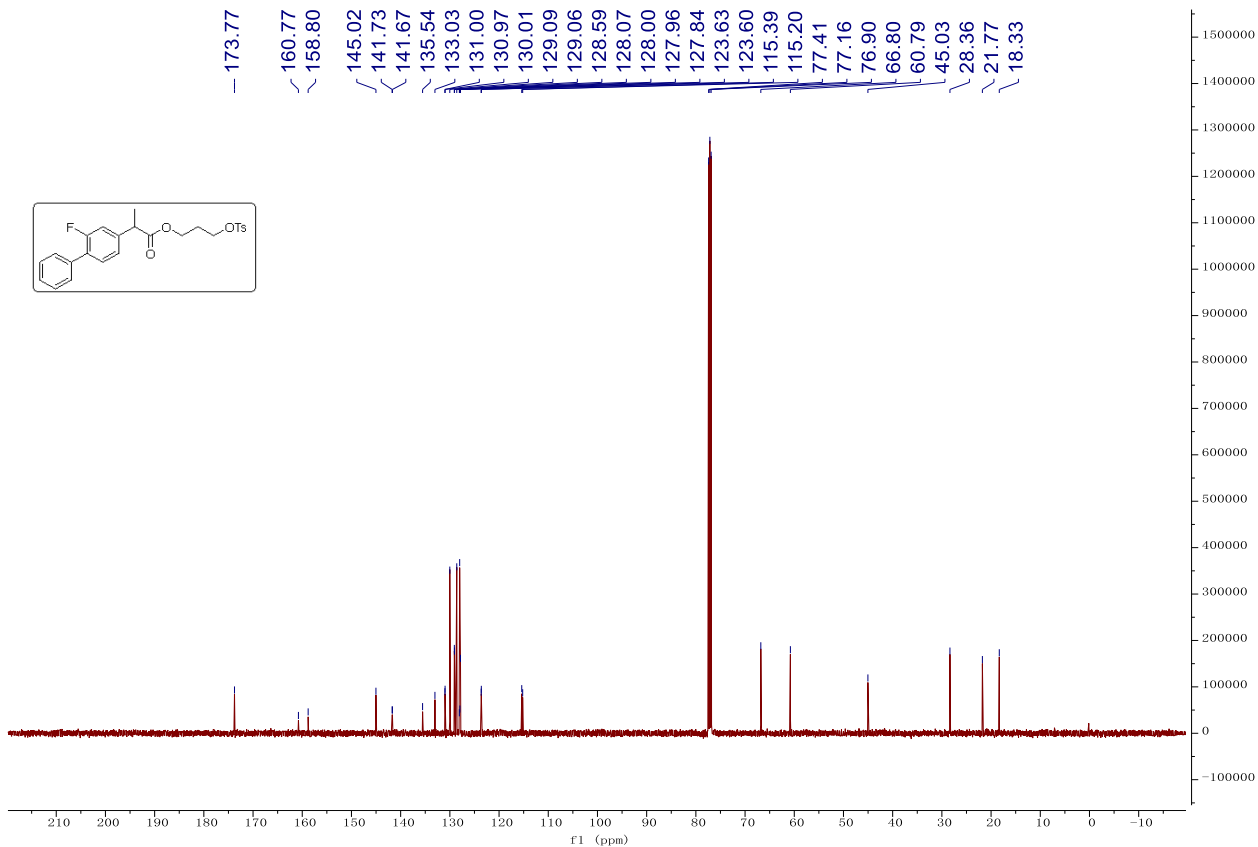

**<sup>13</sup>C NMR Spectrum of 3-(tosyloxy) propyl 2-(2-fluoro-[1,1'-biphenyl]-4-yl) propanoate (CDCl<sub>3</sub>, 126 MHz)**

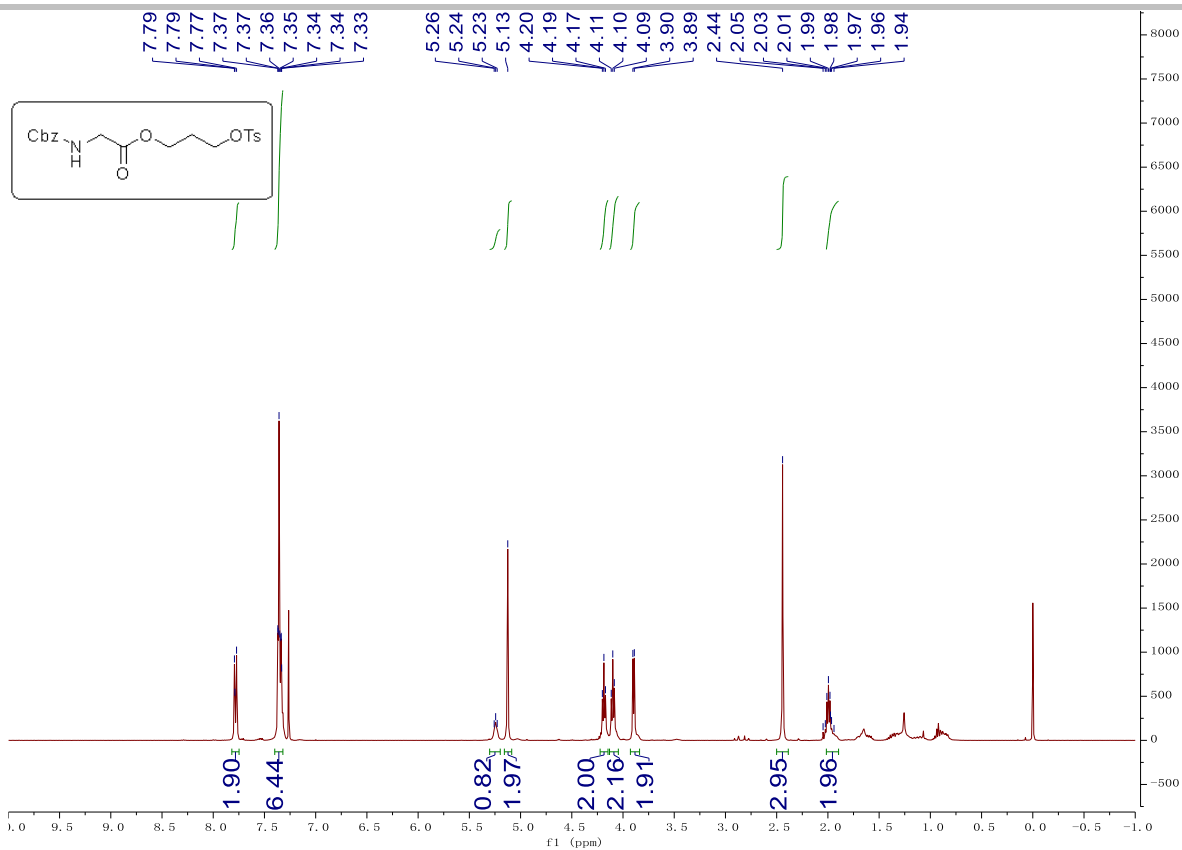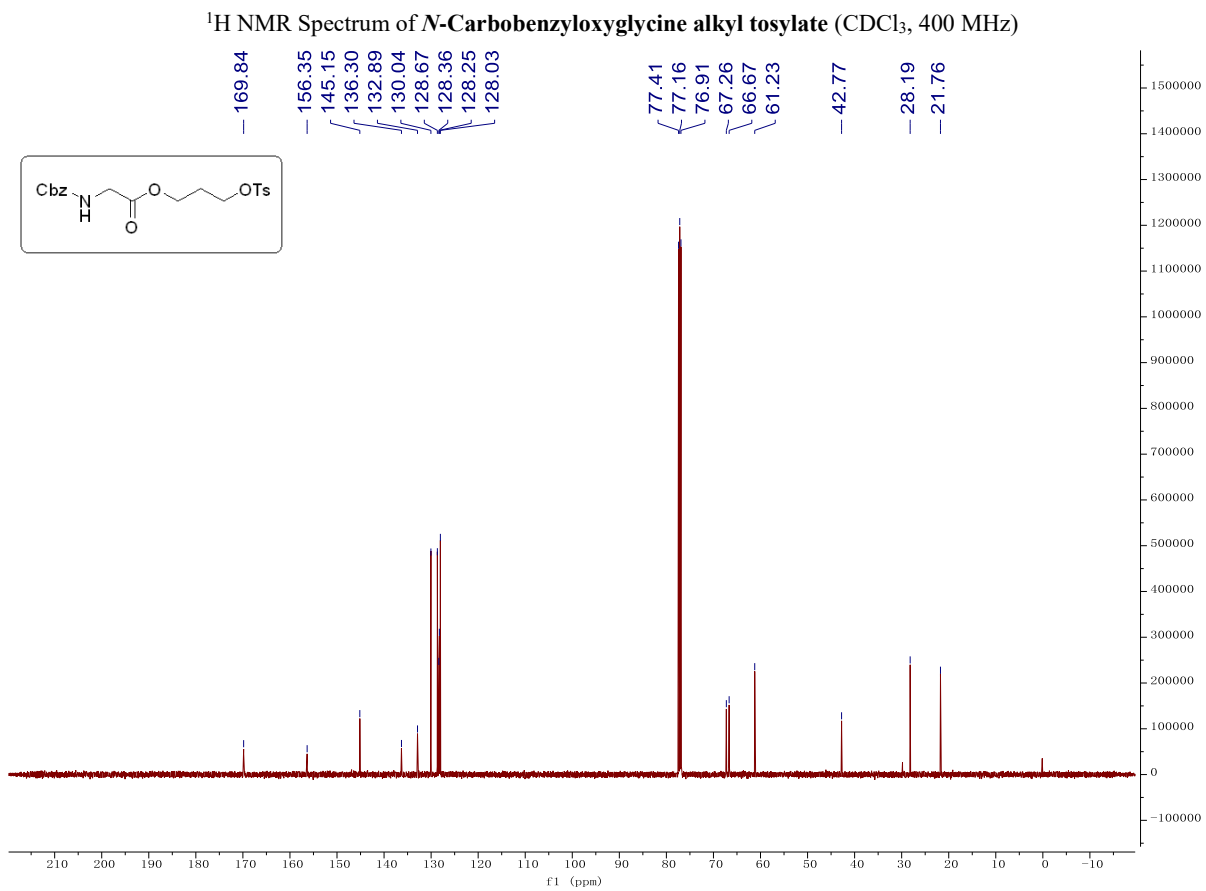

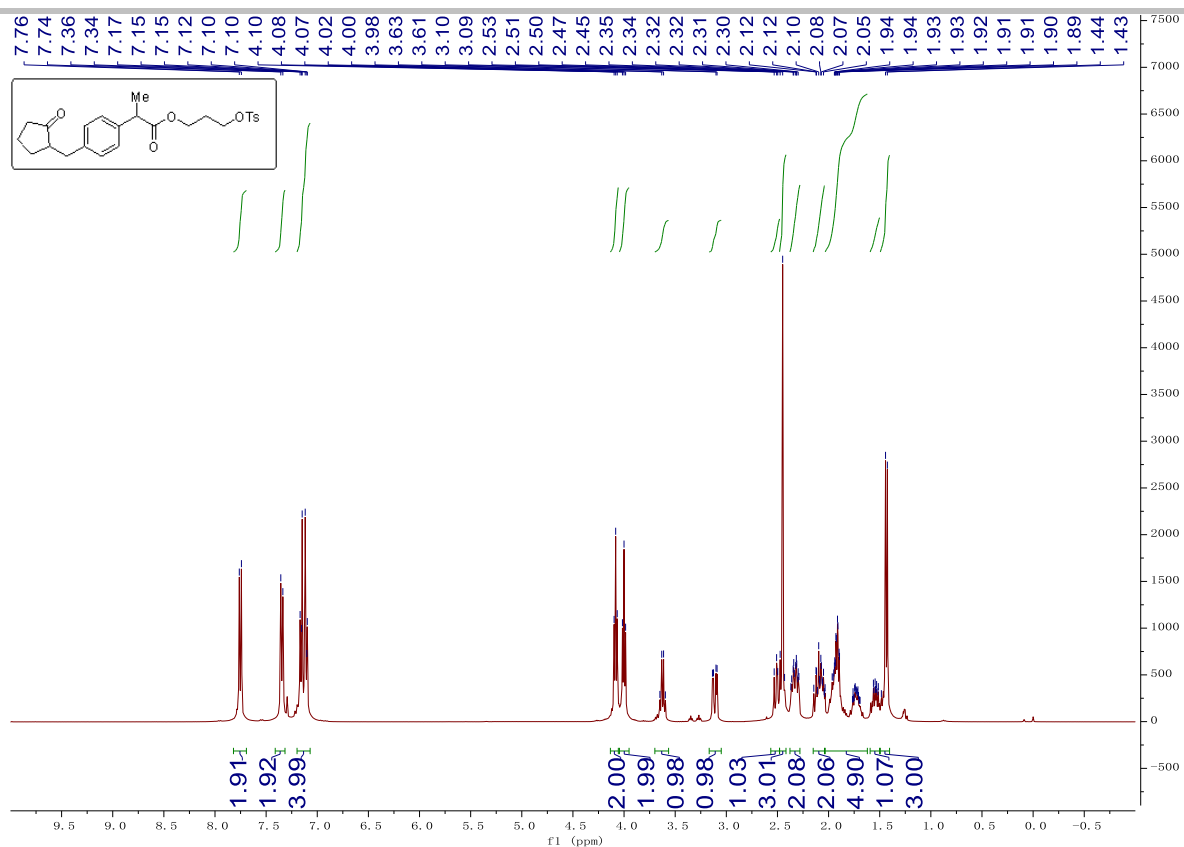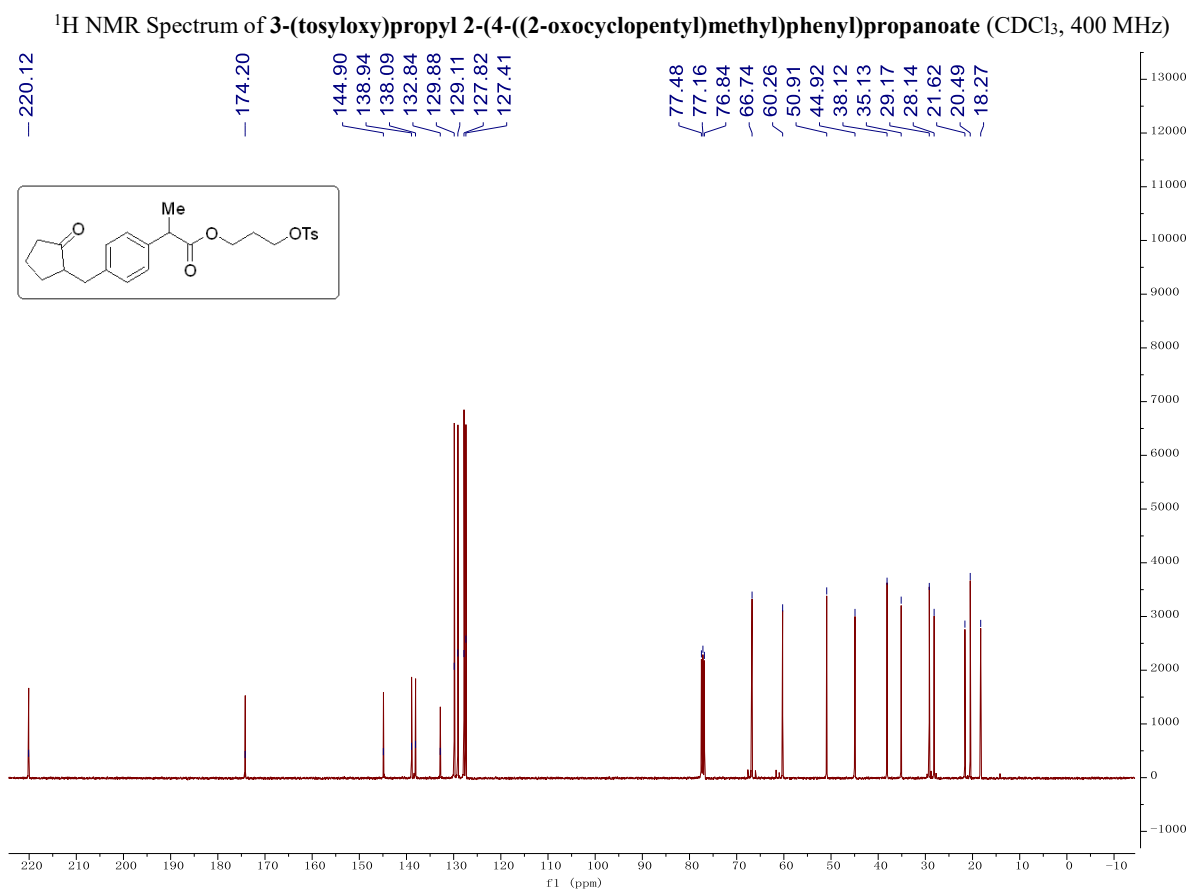

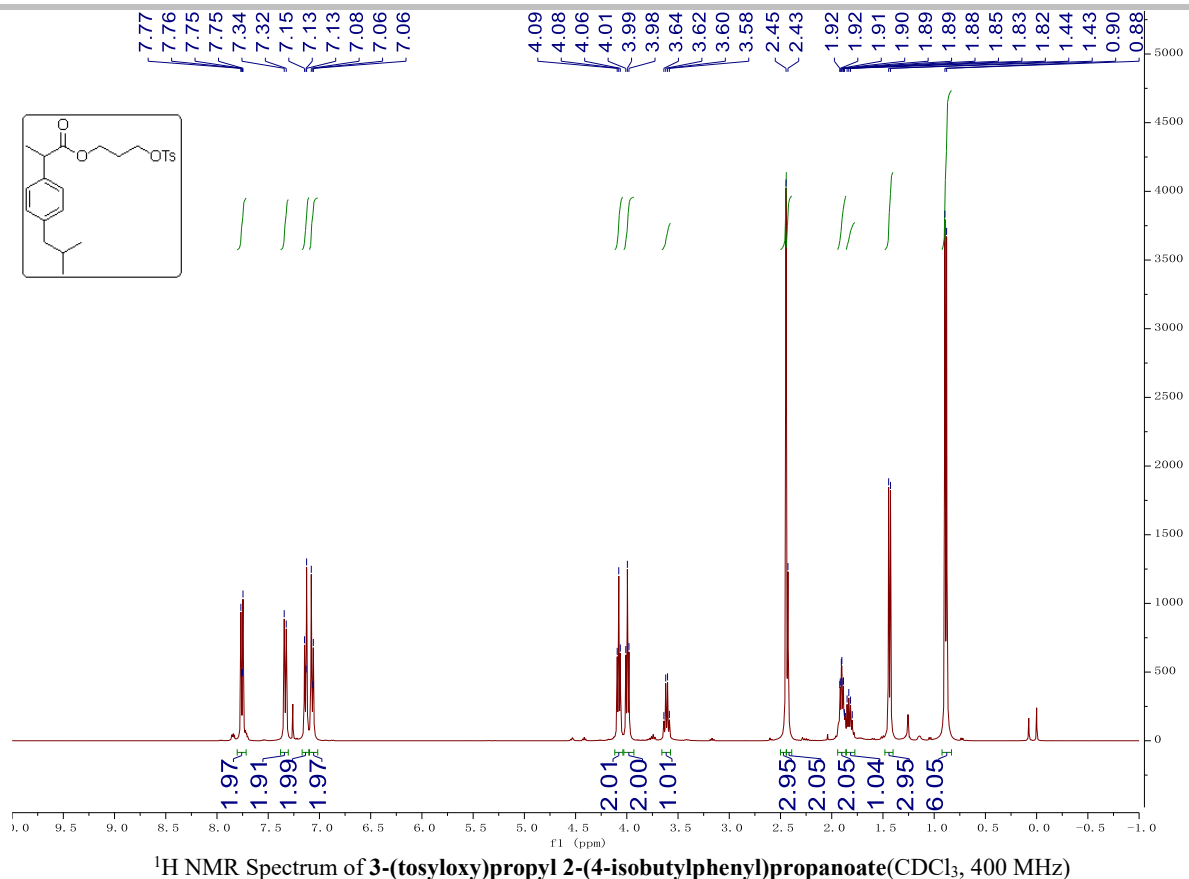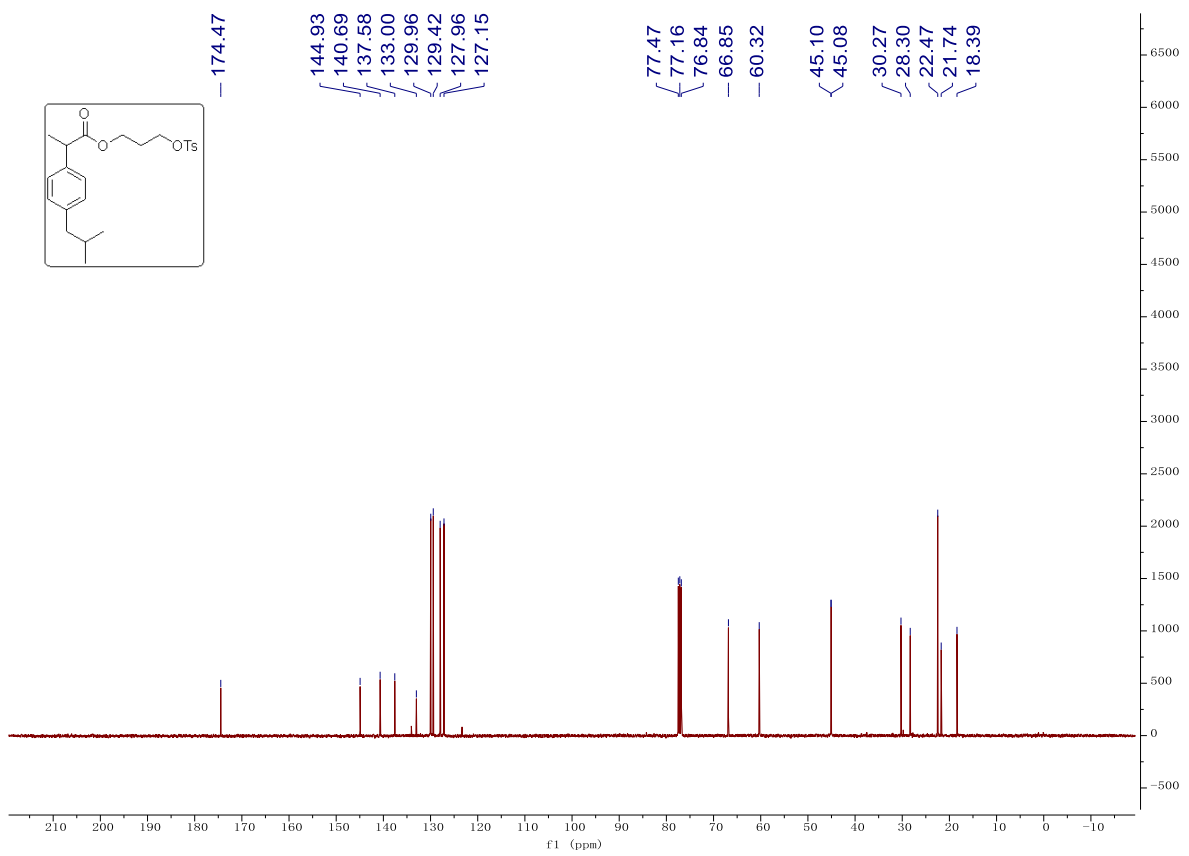

# NMR Spectra of Products (<sup>1</sup>H NMR, <sup>19</sup>F NMR, <sup>13</sup>C NMR)

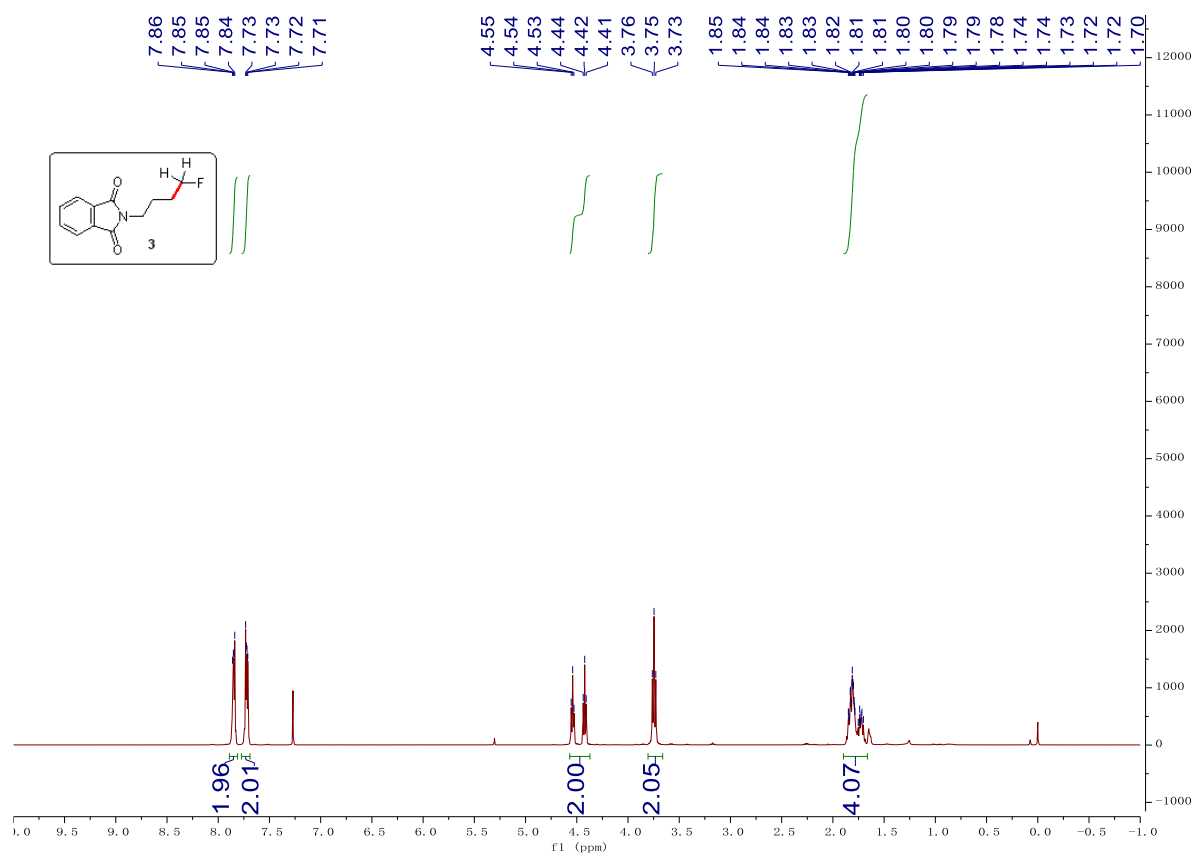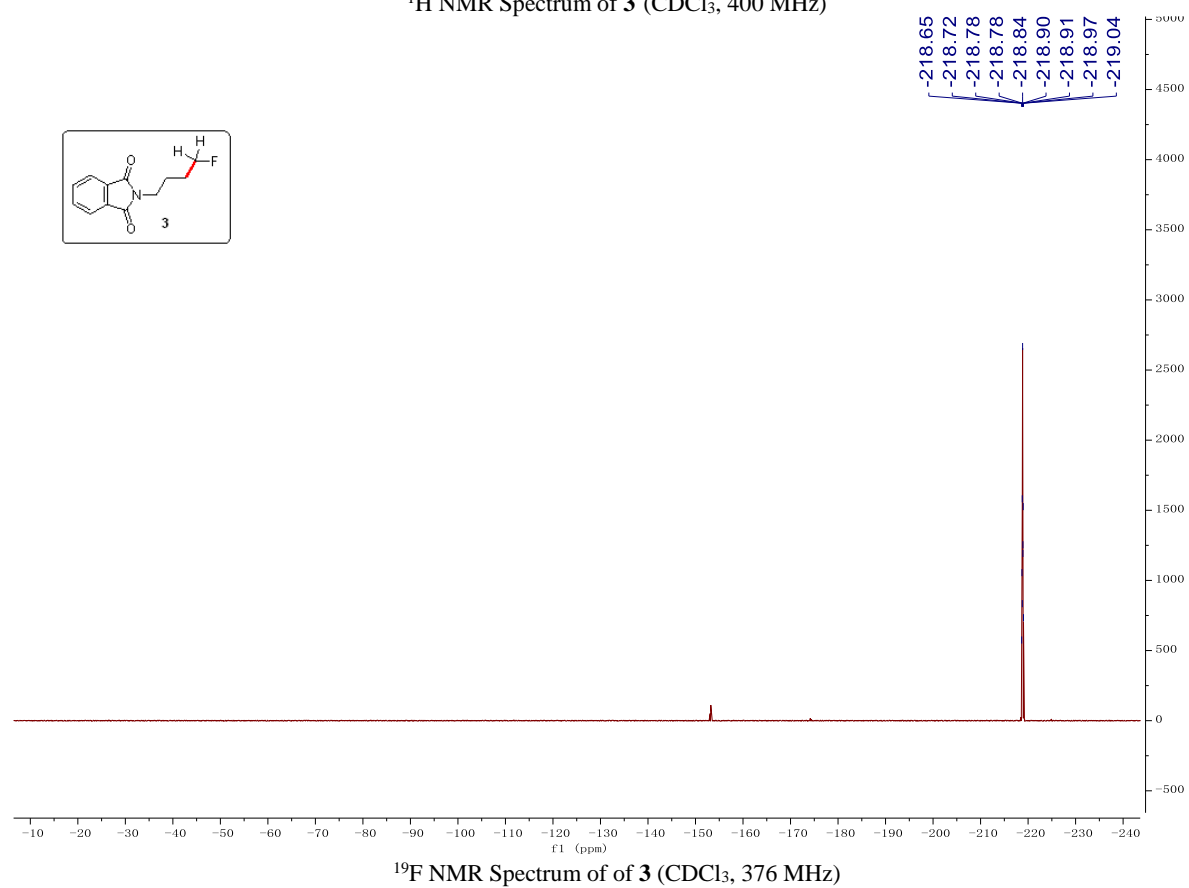



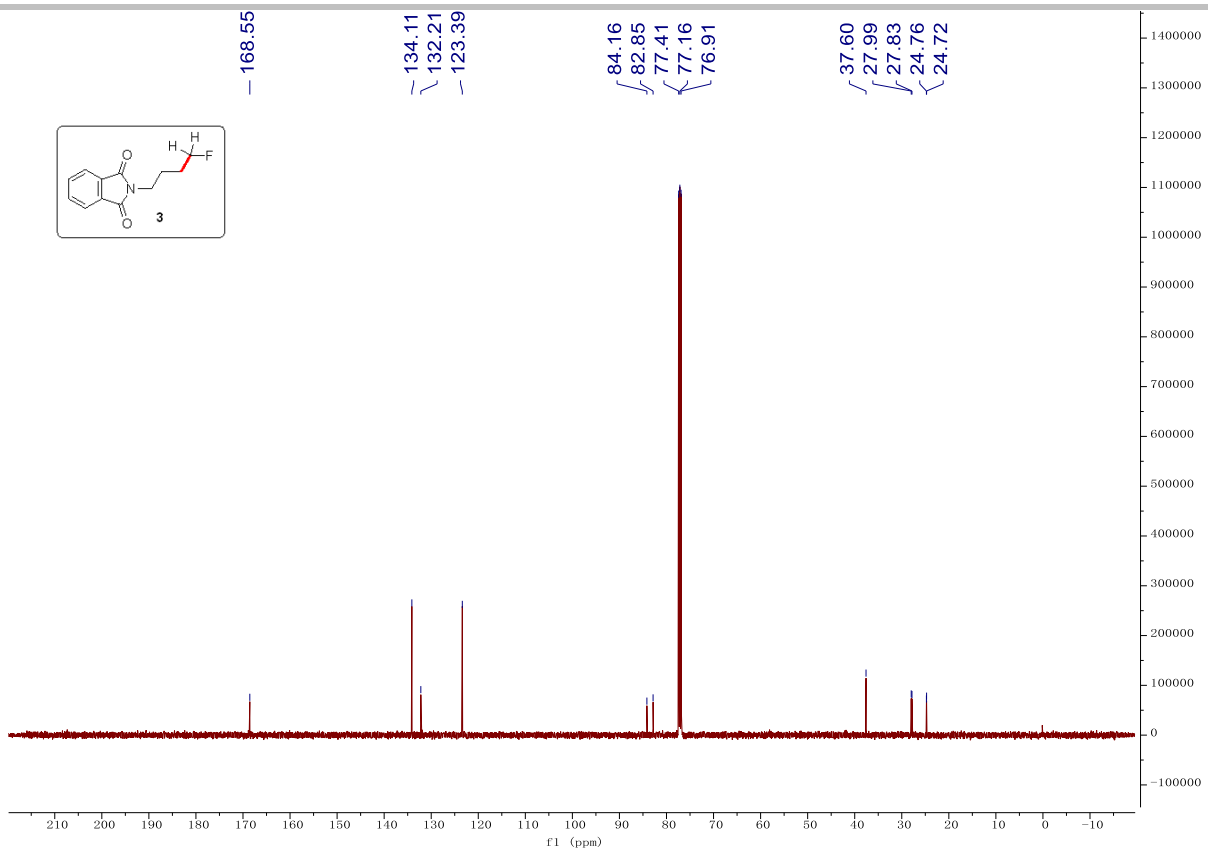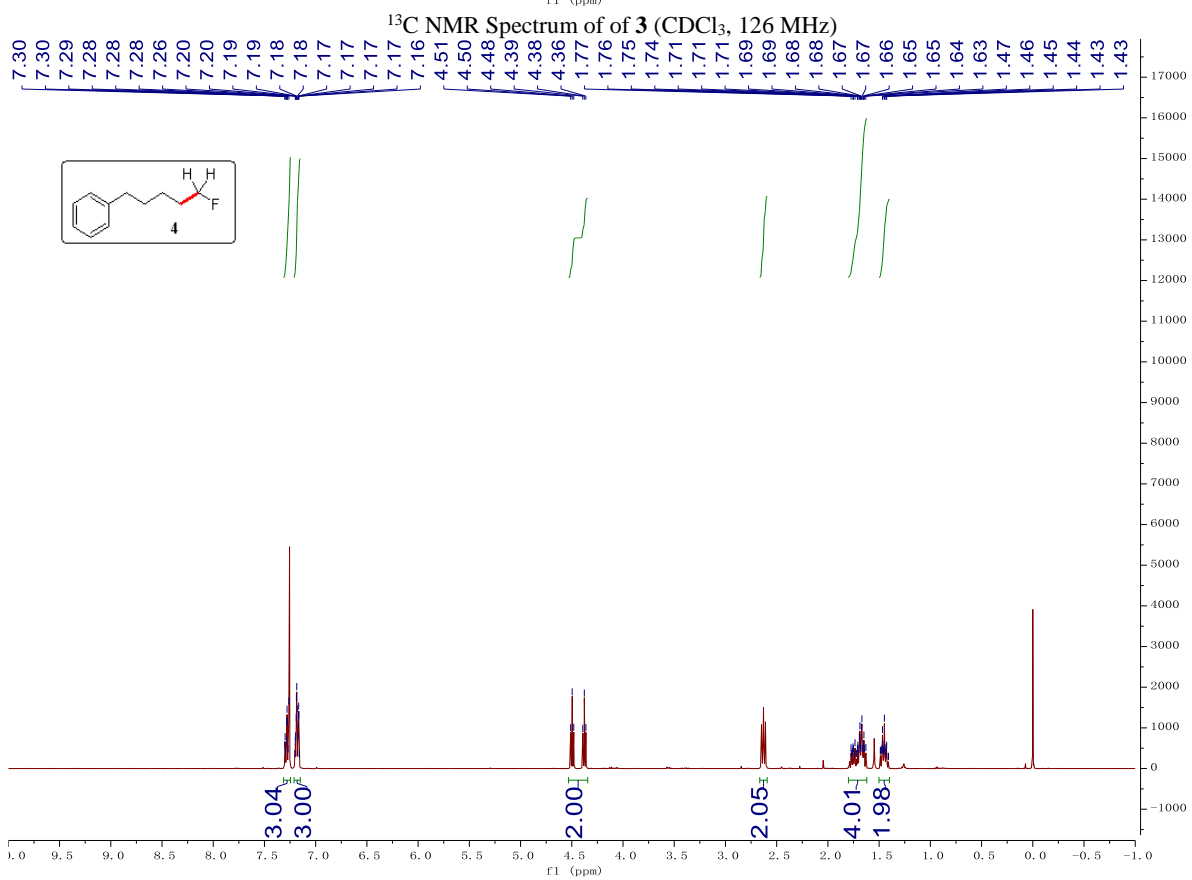

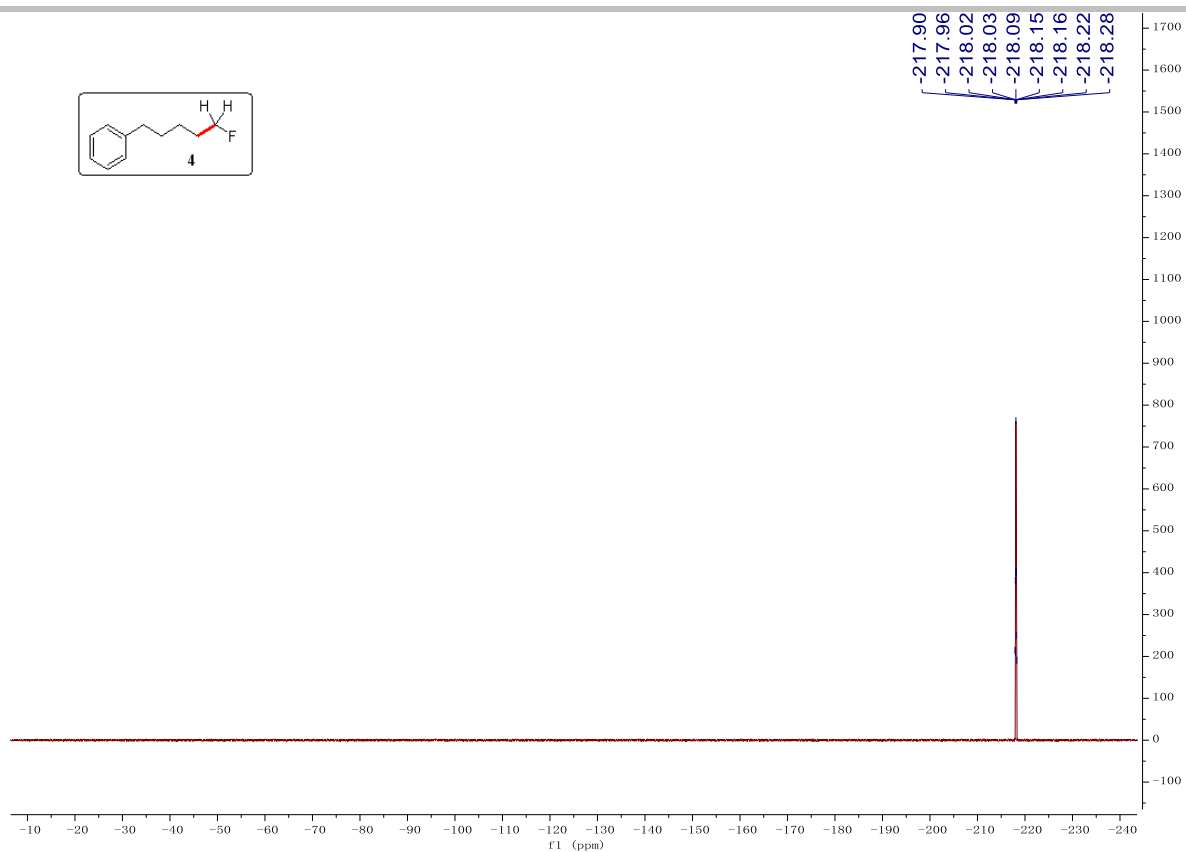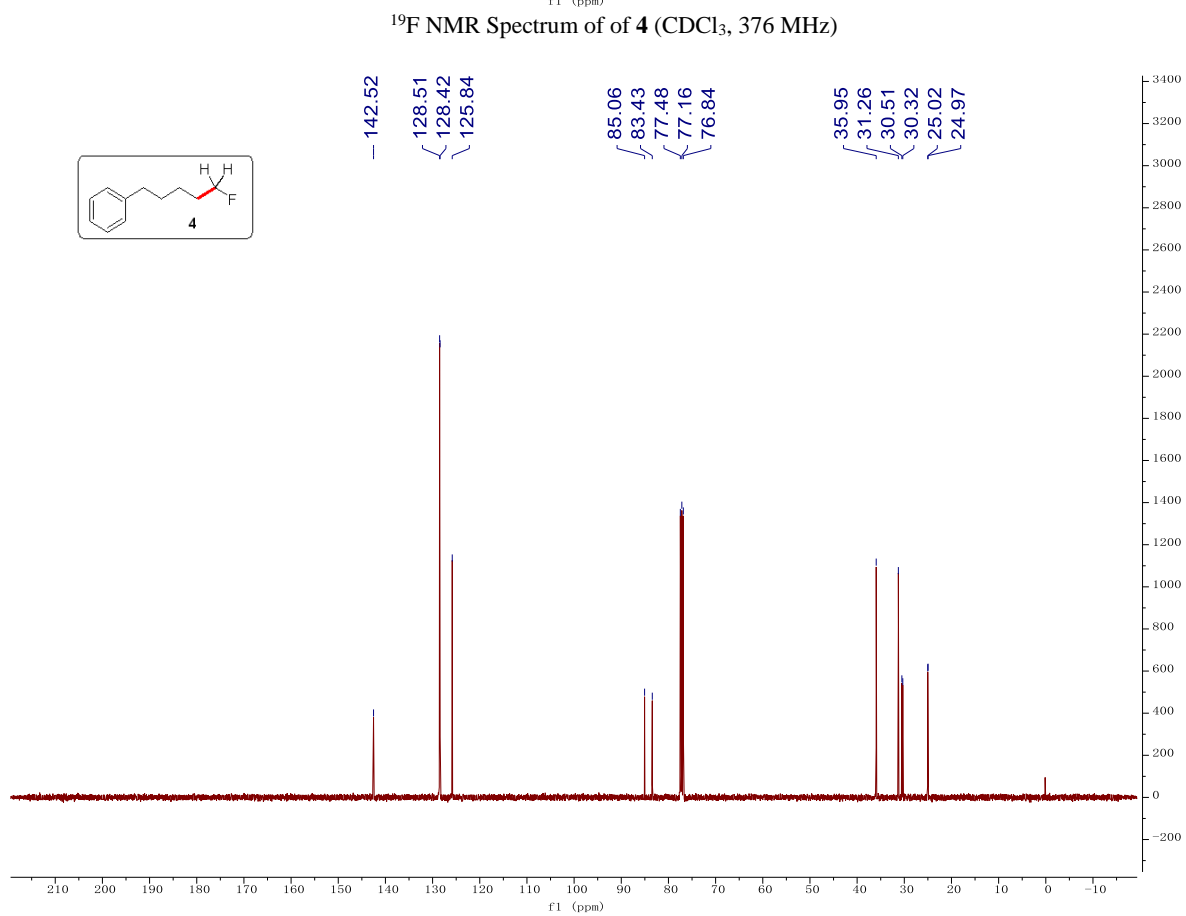

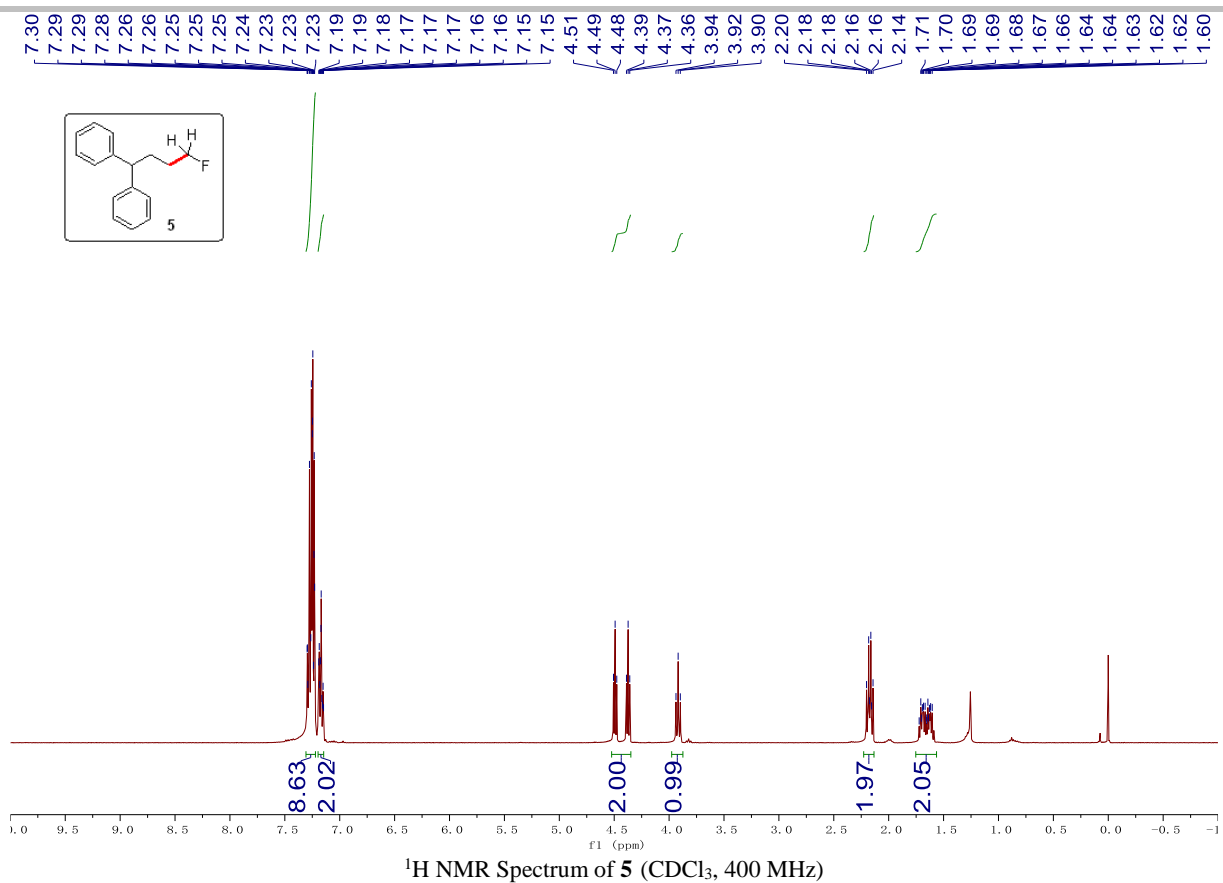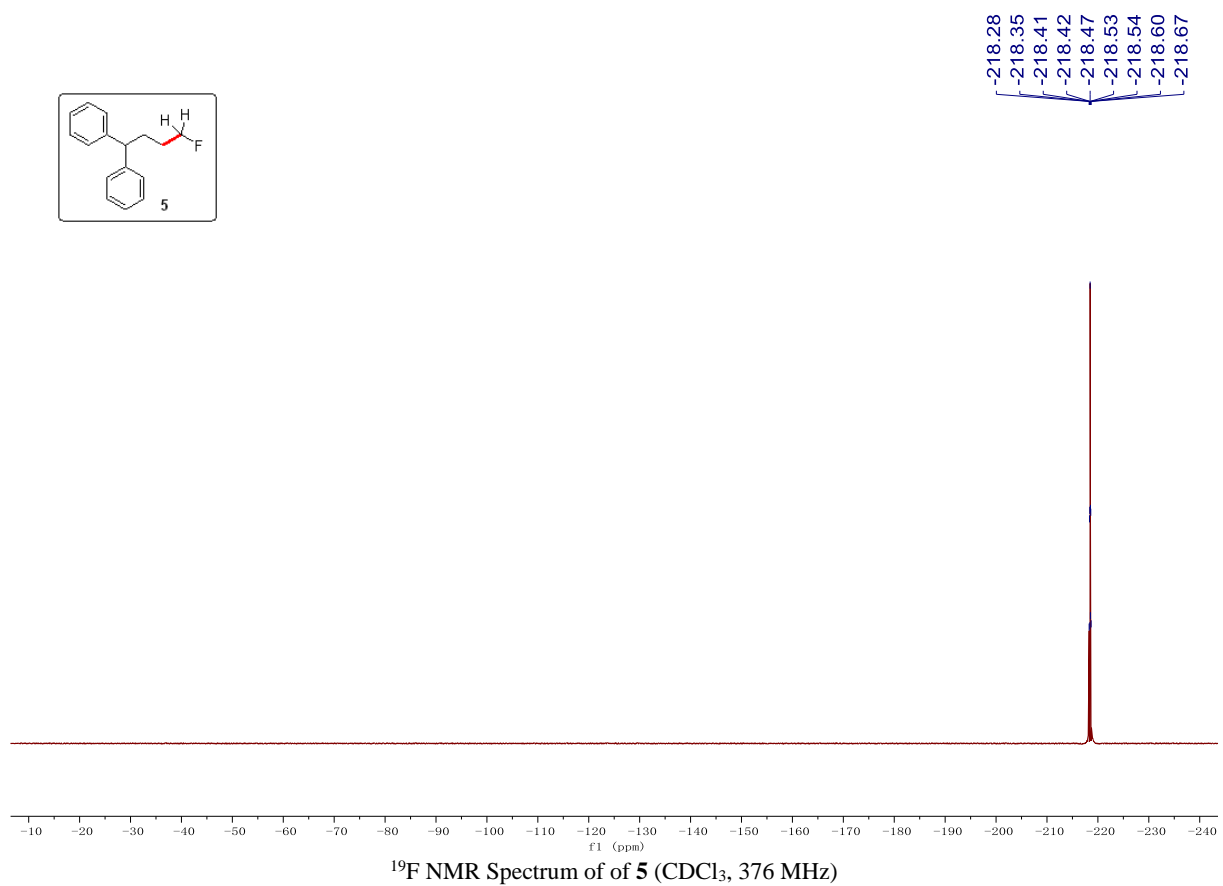

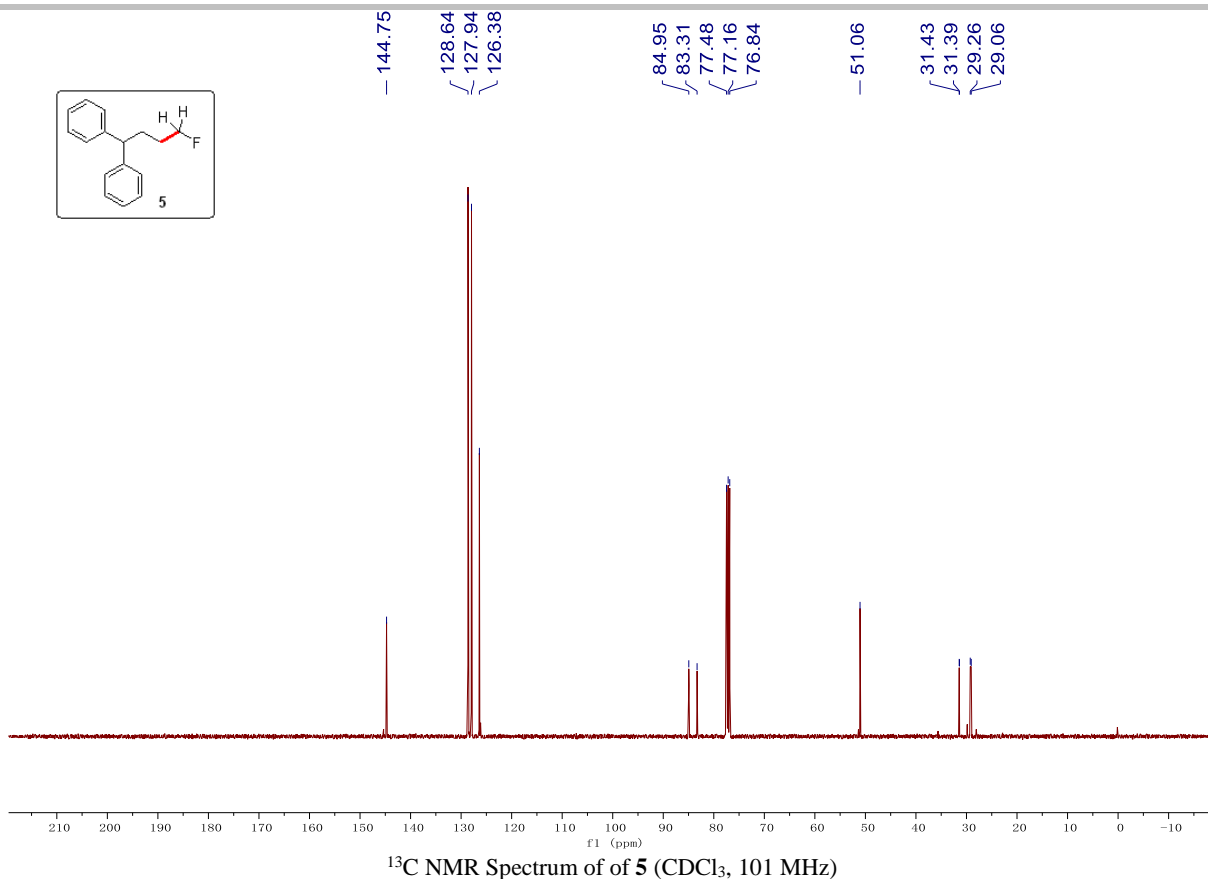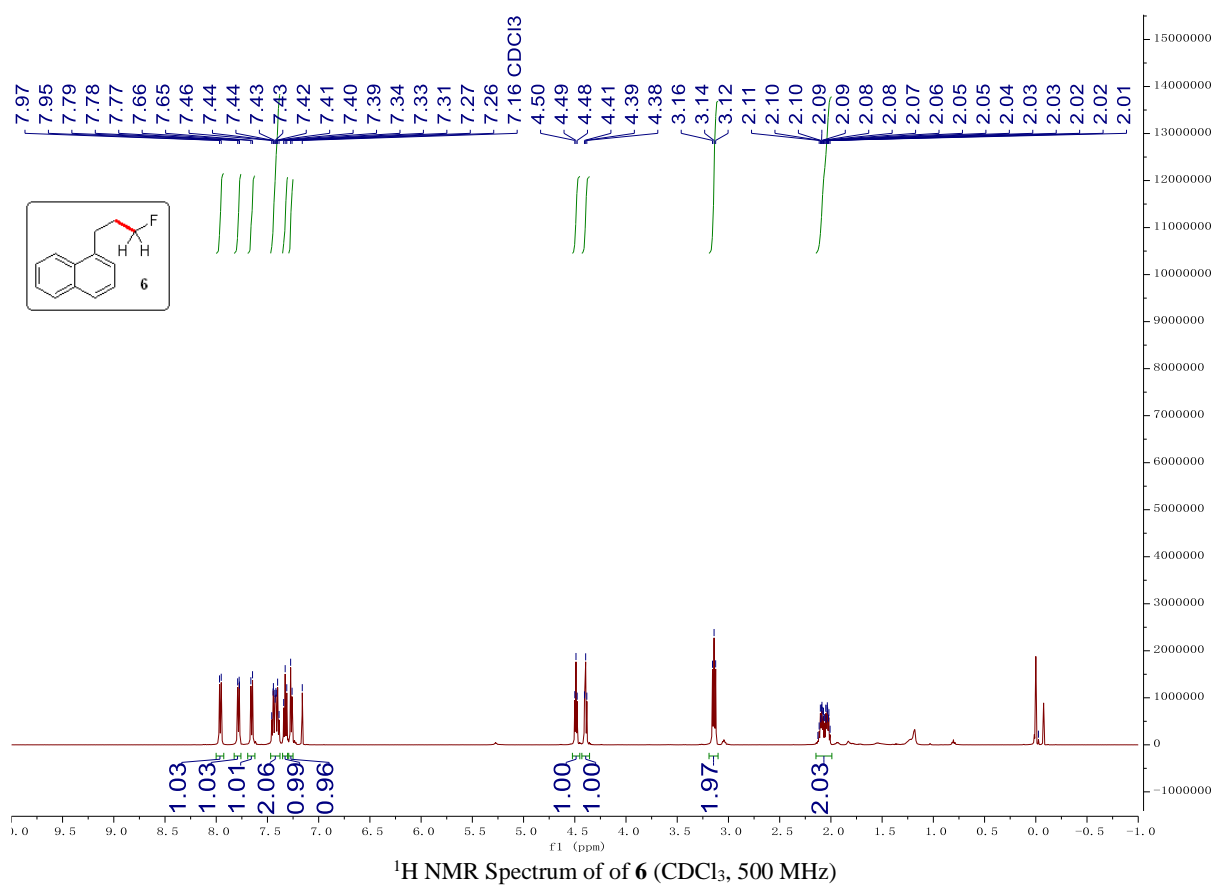

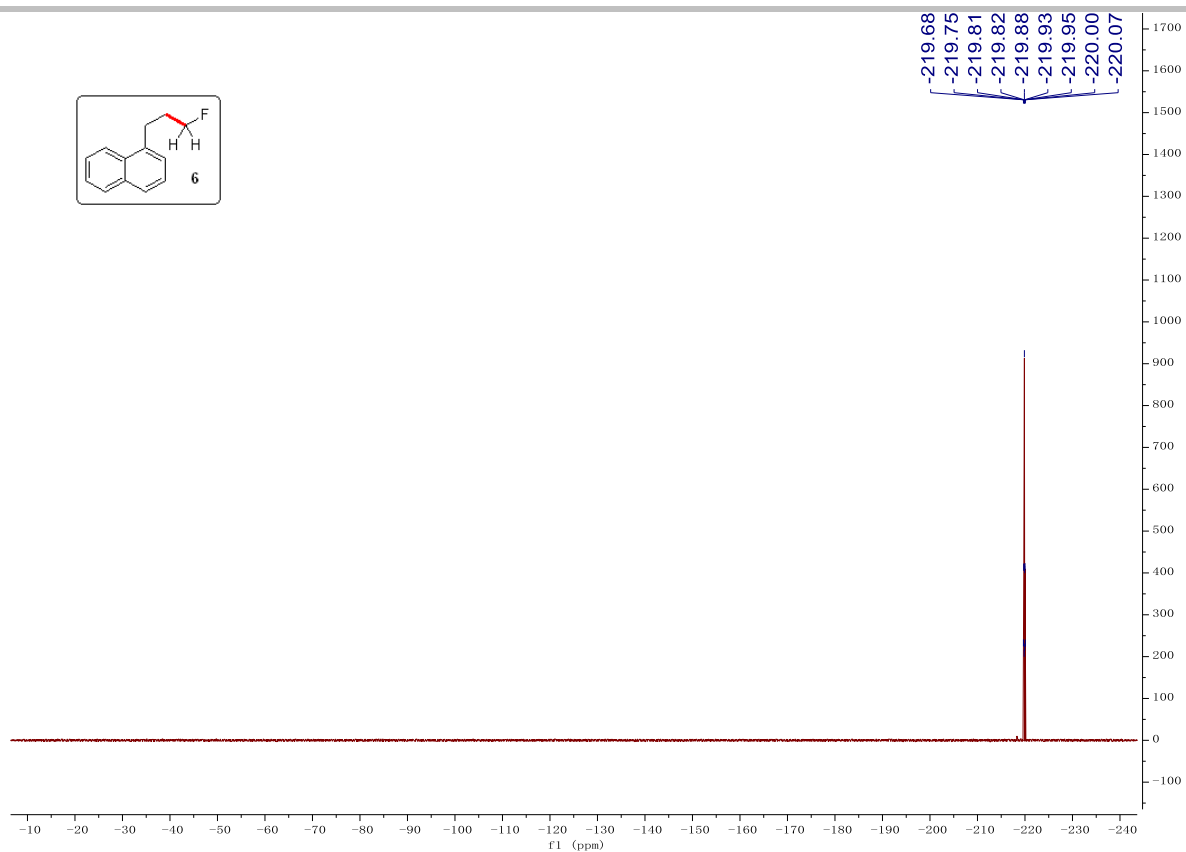

$^{19}\text{F}$  NMR Spectrum of of **6** ( $\text{CDCl}_3$ , 376 MHz)

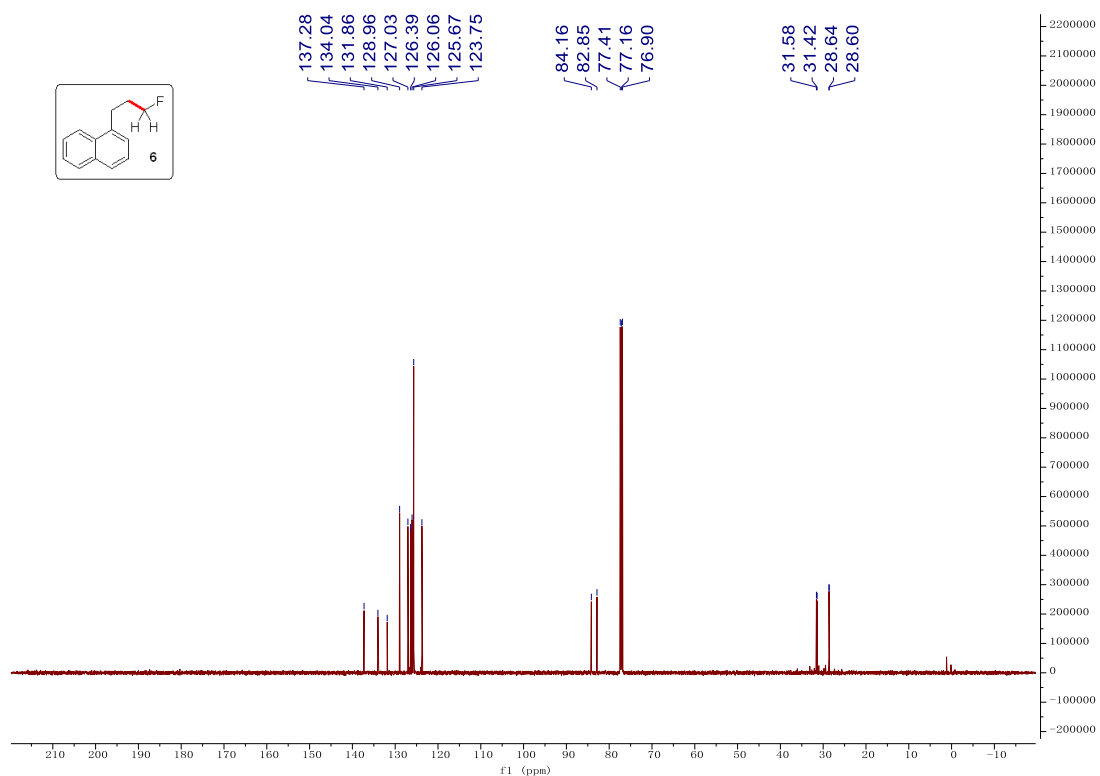

$^{13}\text{C}$  NMR Spectrum of of **6** ( $\text{CDCl}_3$ , 126 MHz)

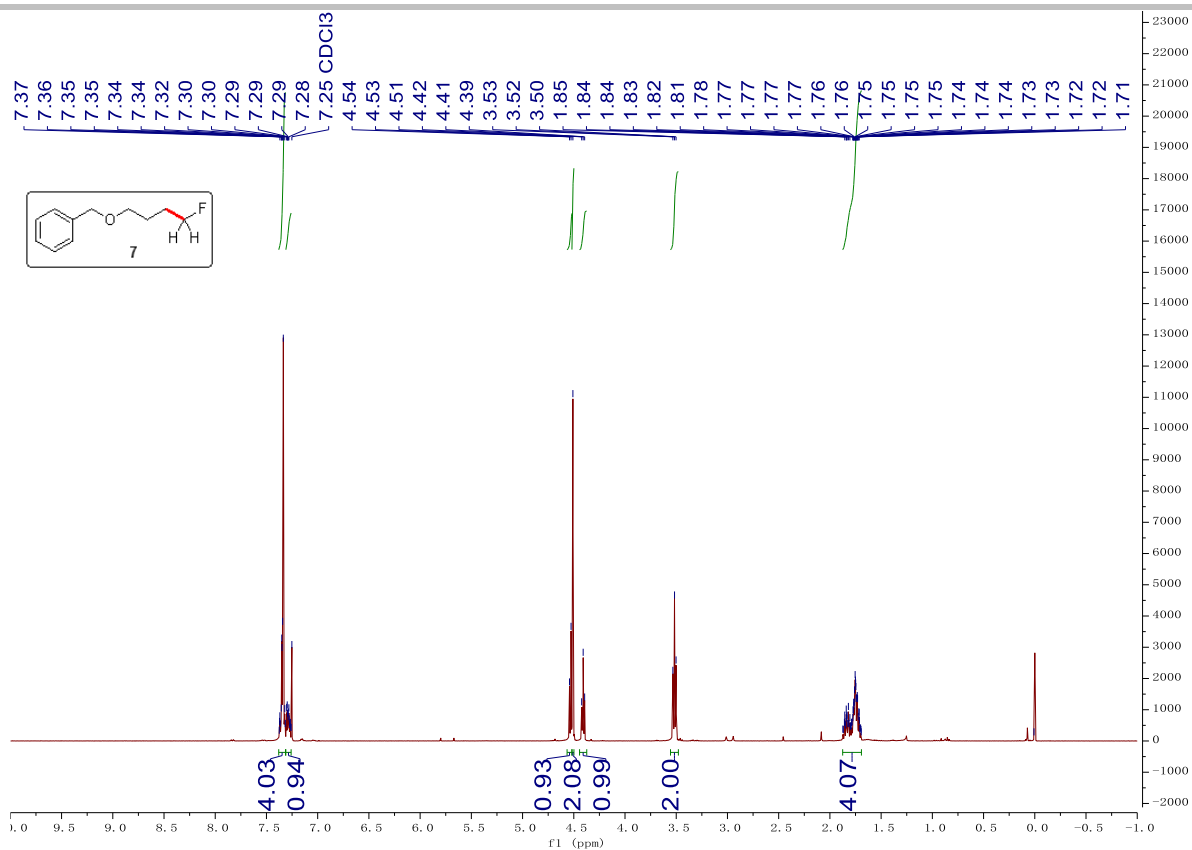

<sup>1</sup>H NMR Spectrum of 7 (CDCl<sub>3</sub>, 400 MHz)

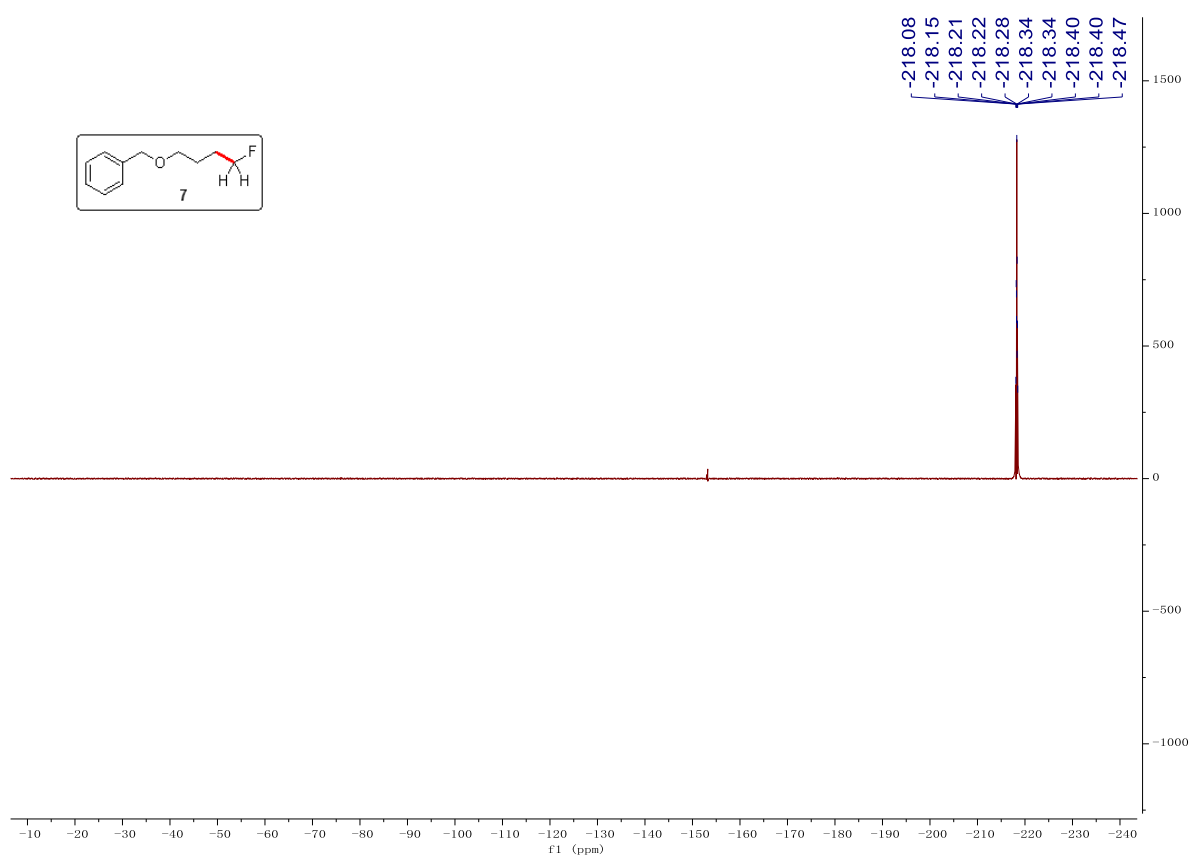

<sup>19</sup>F NMR Spectrum of 7 (CDCl<sub>3</sub>, 376 MHz)

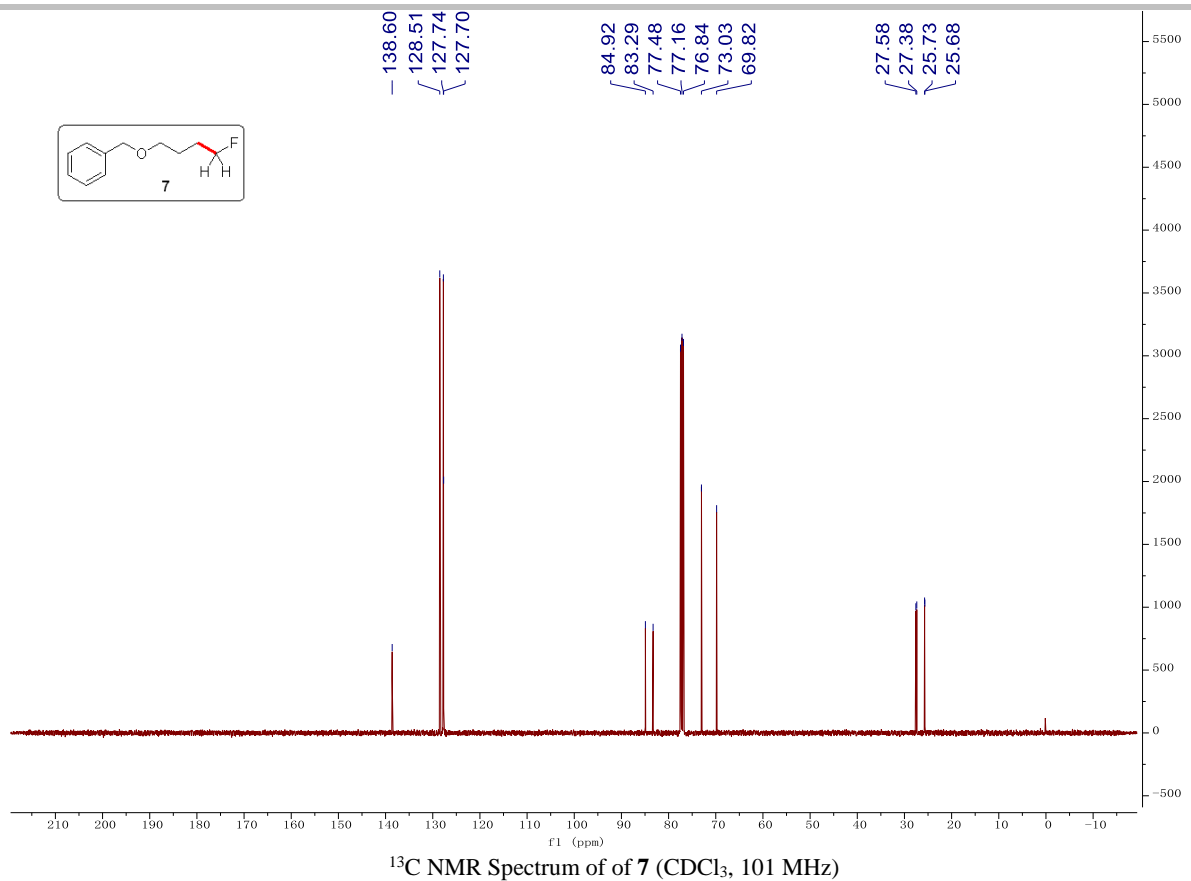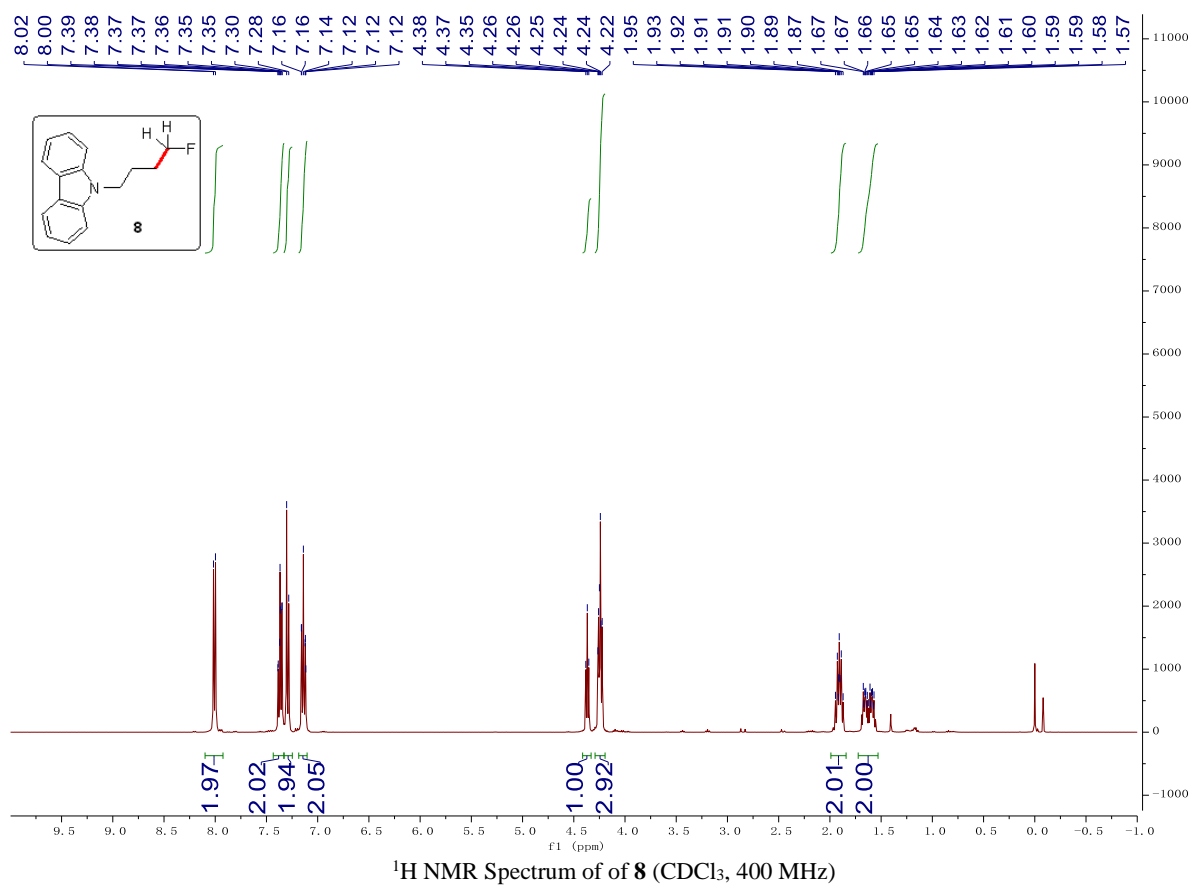

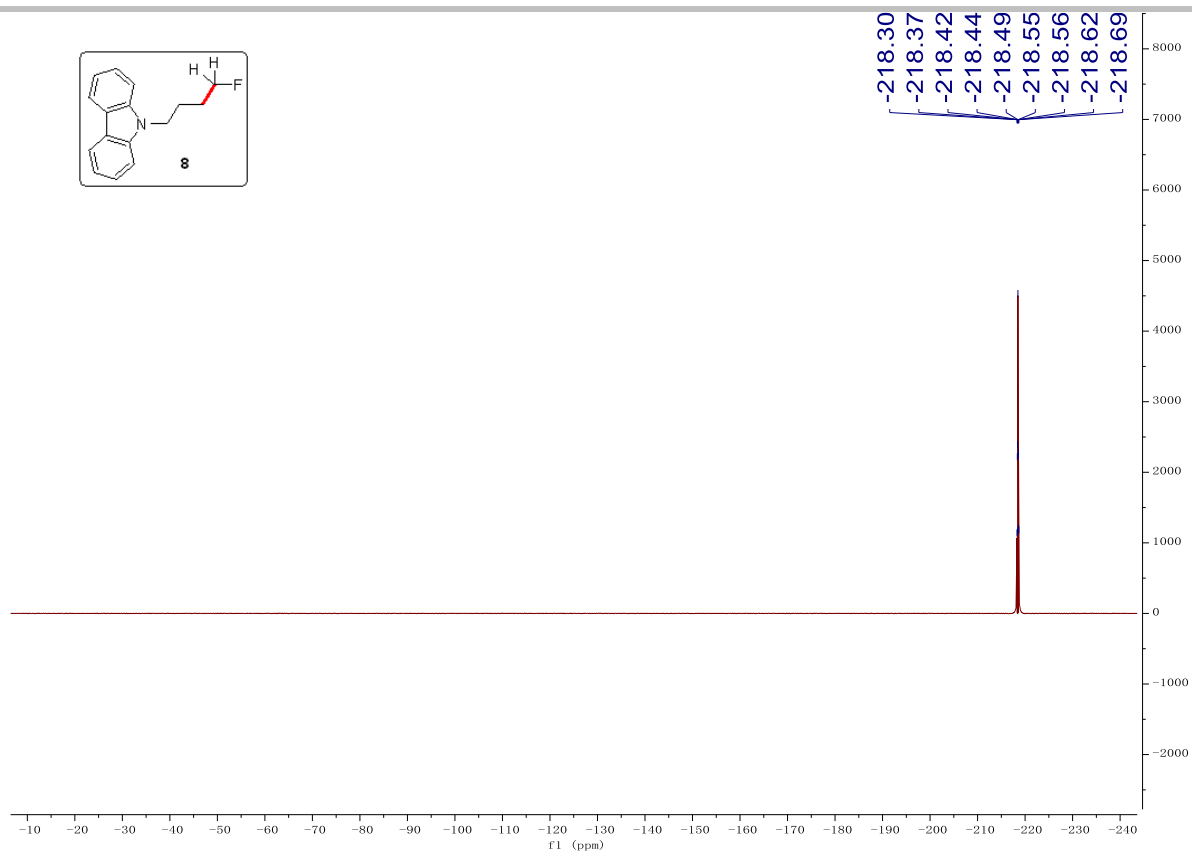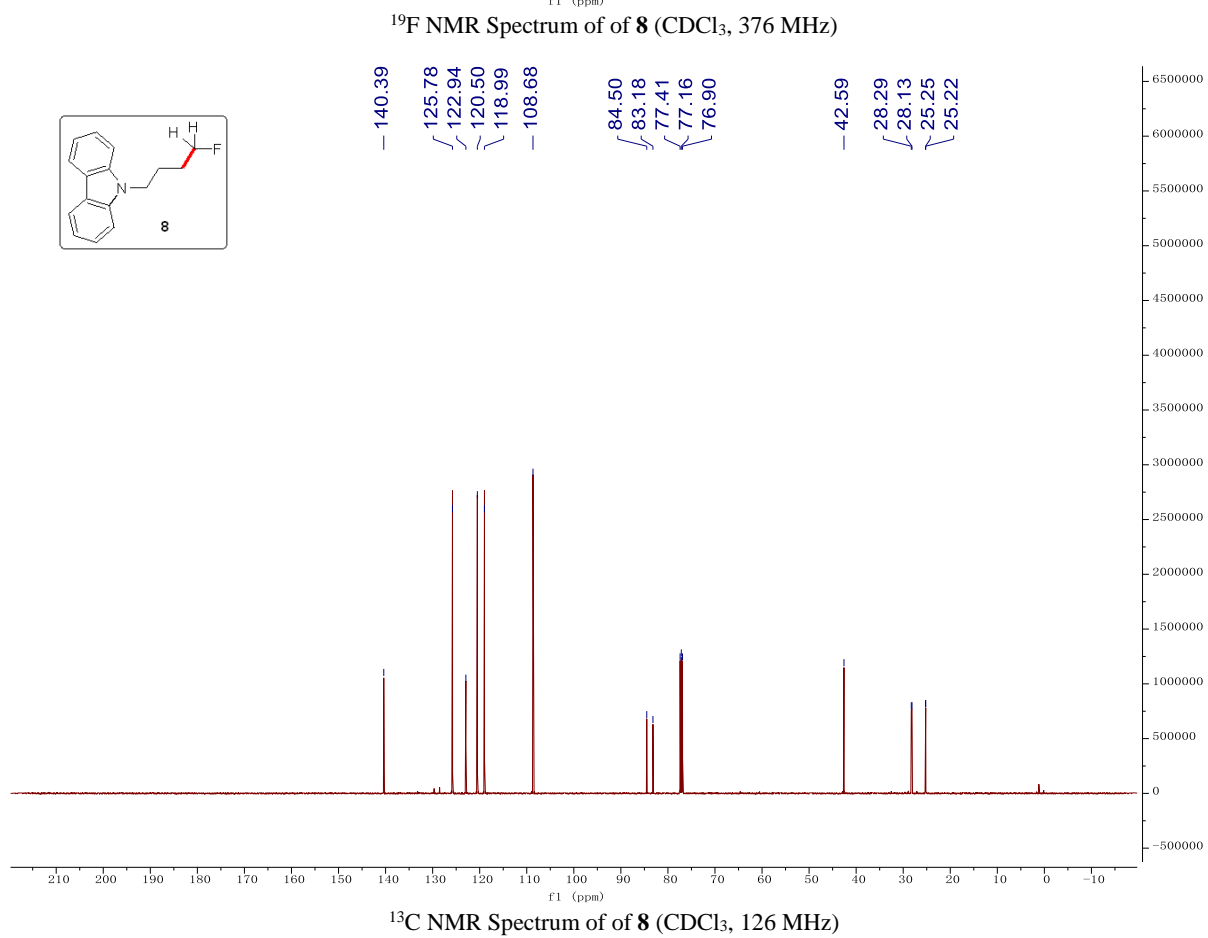



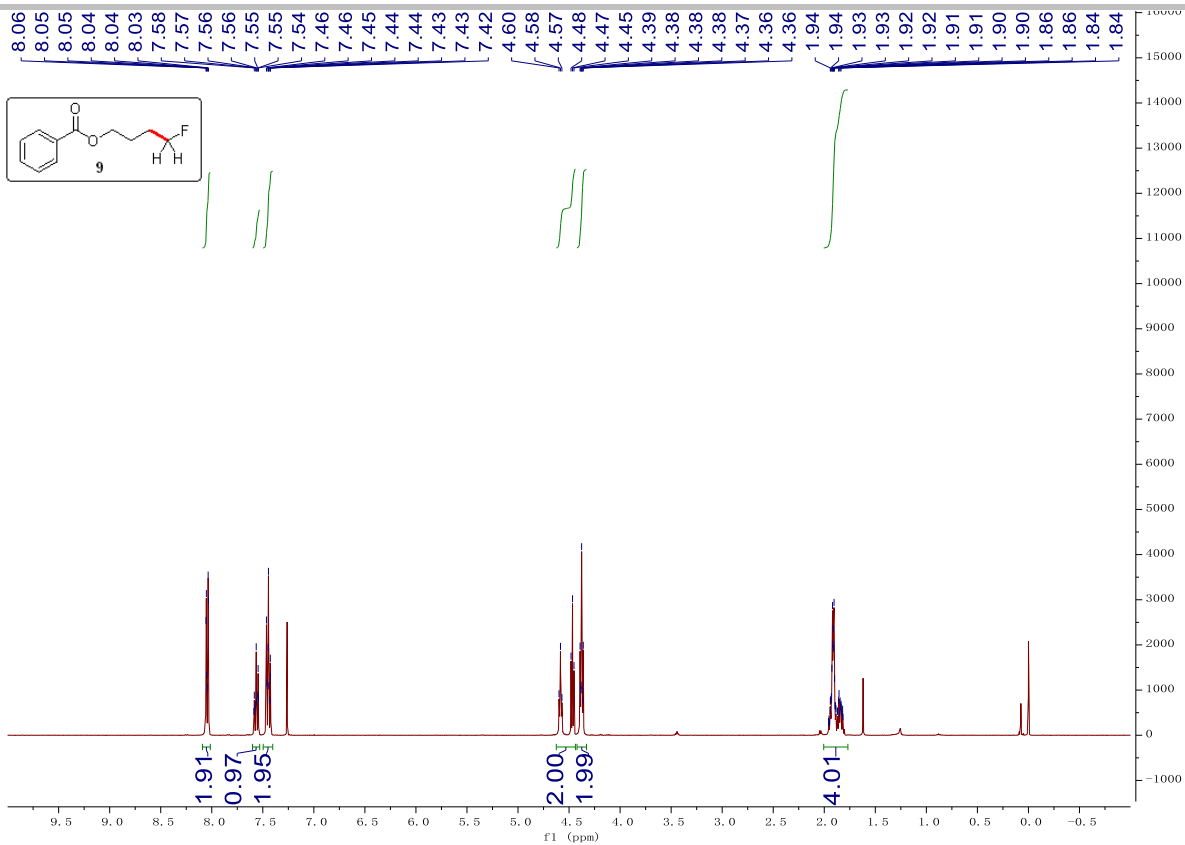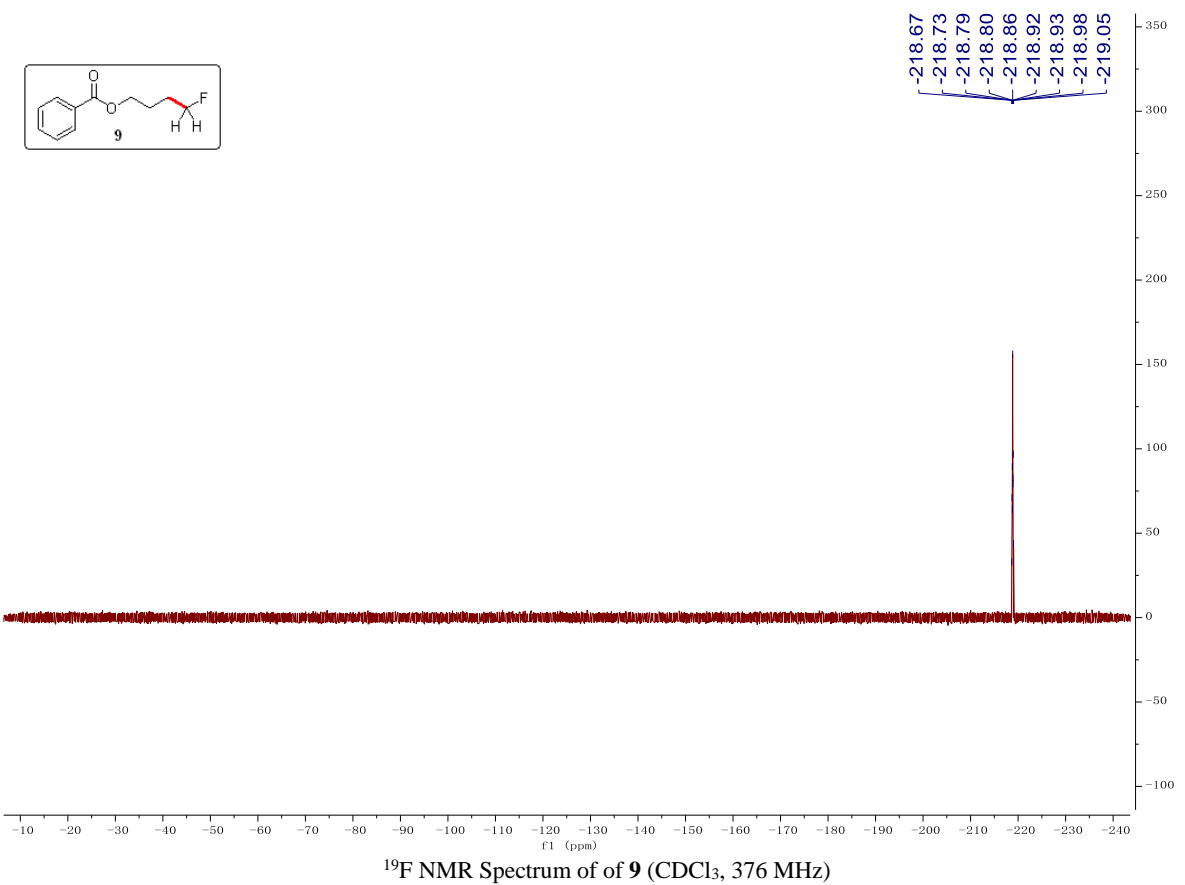

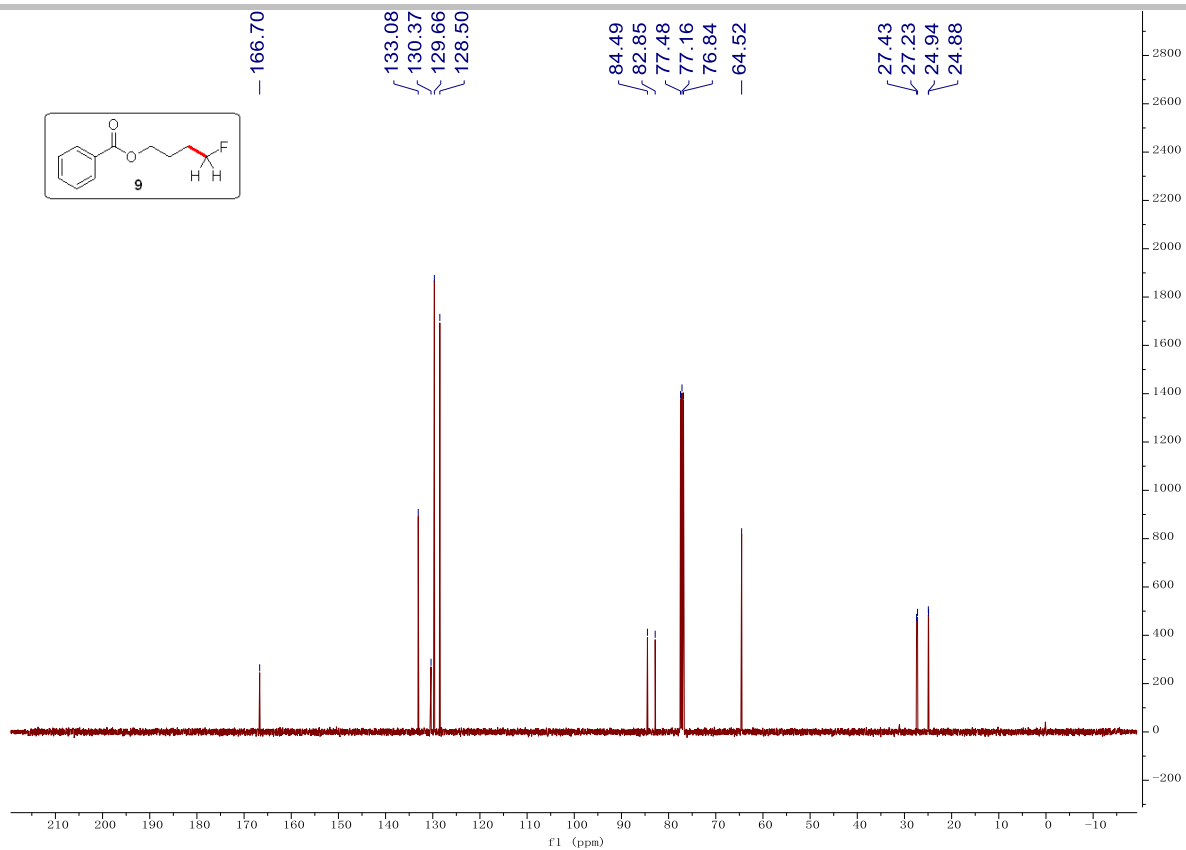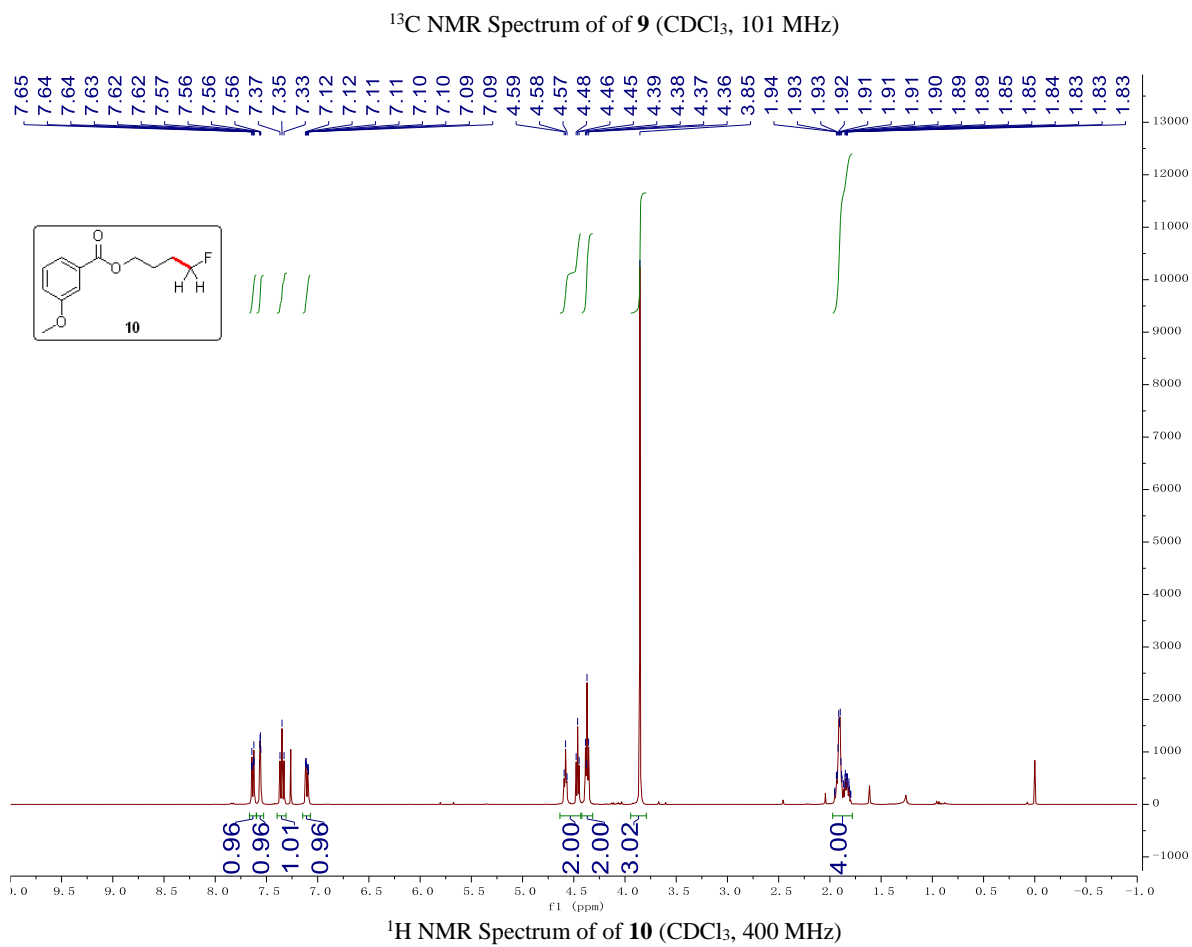

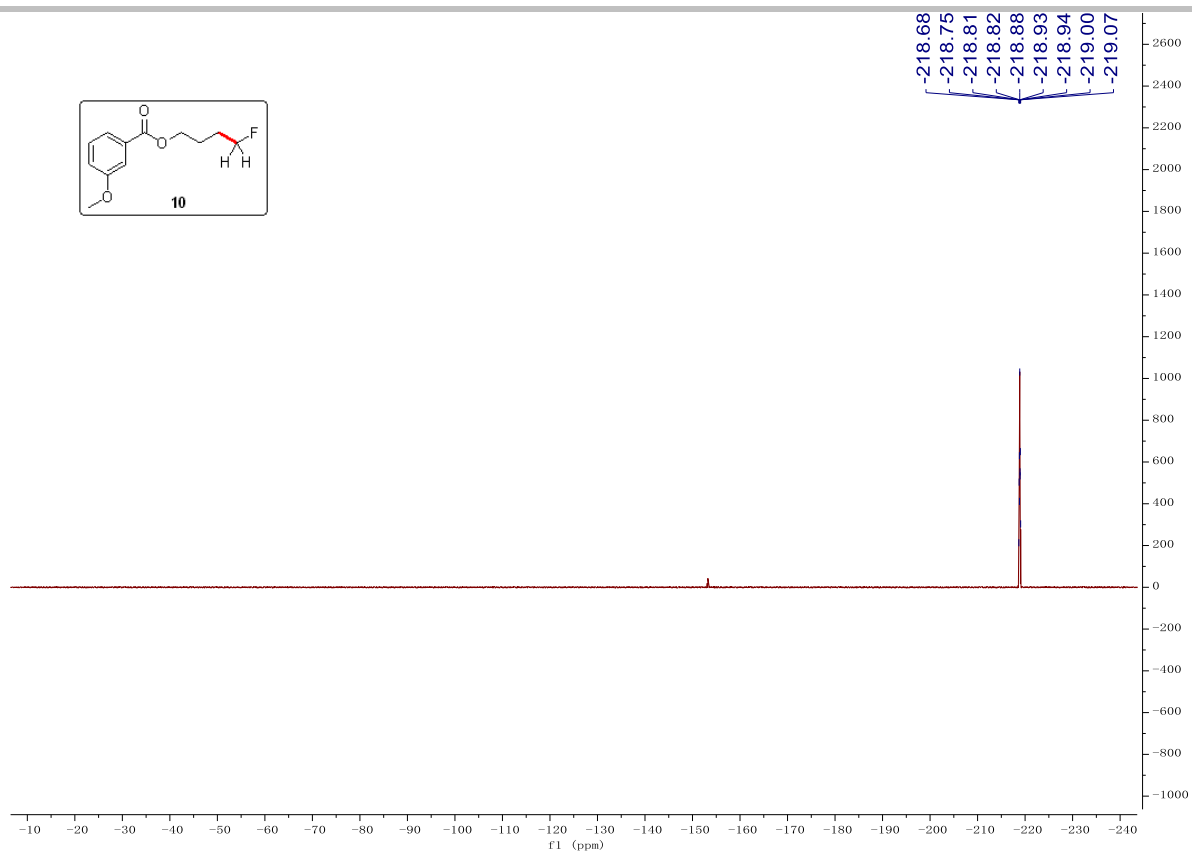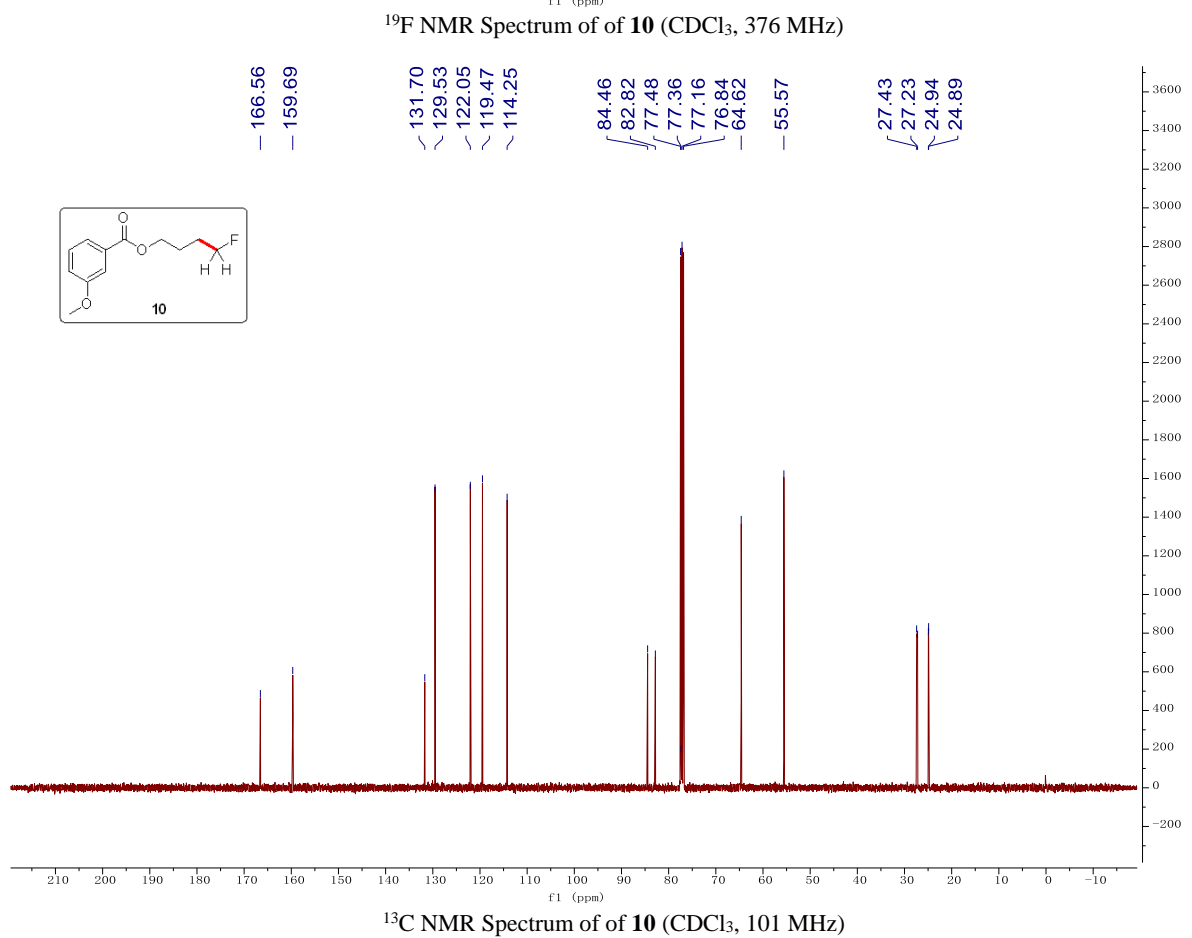

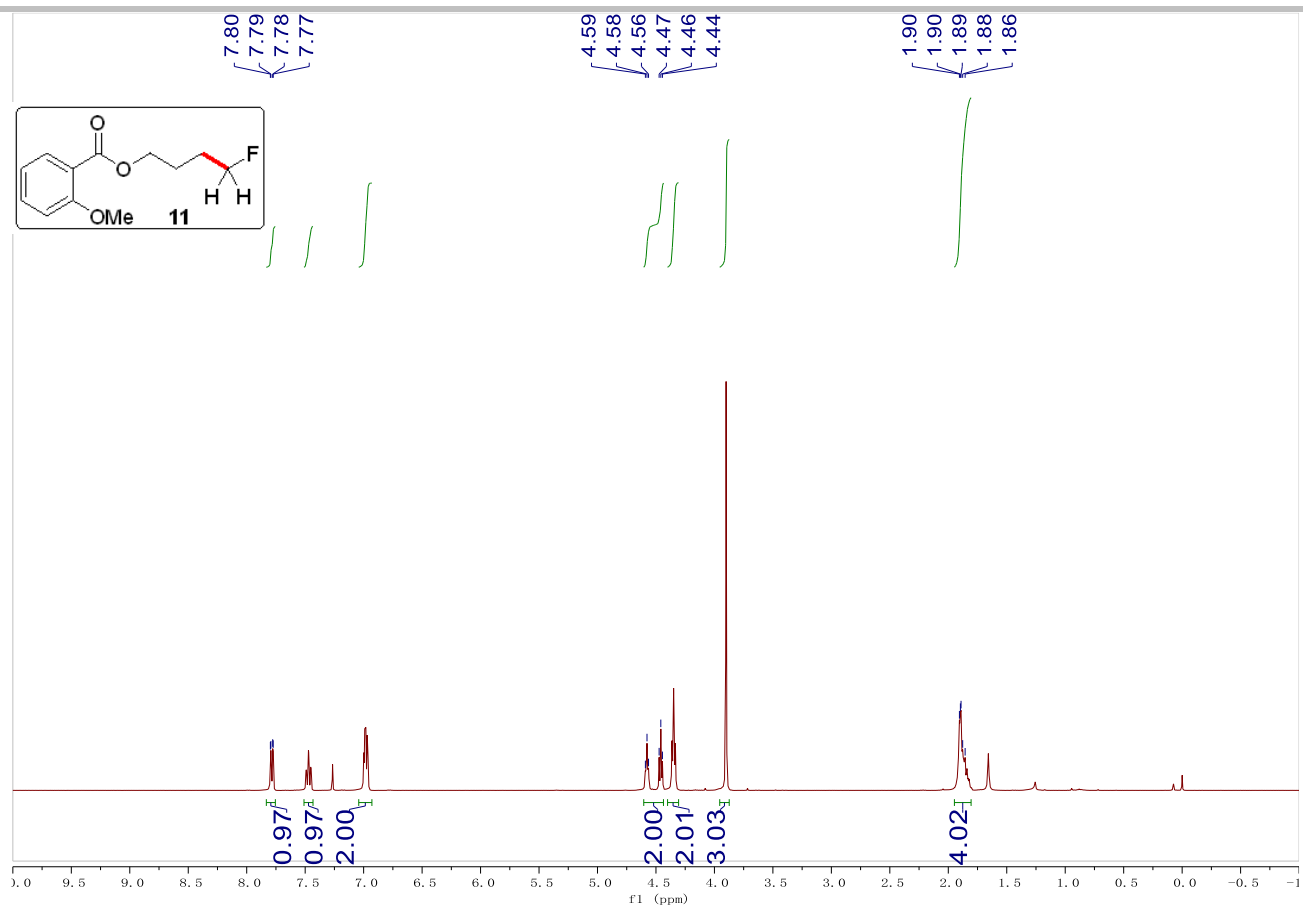

<sup>1</sup>H NMR Spectrum of of **11** (CDCl<sub>3</sub>, 400 MHz)

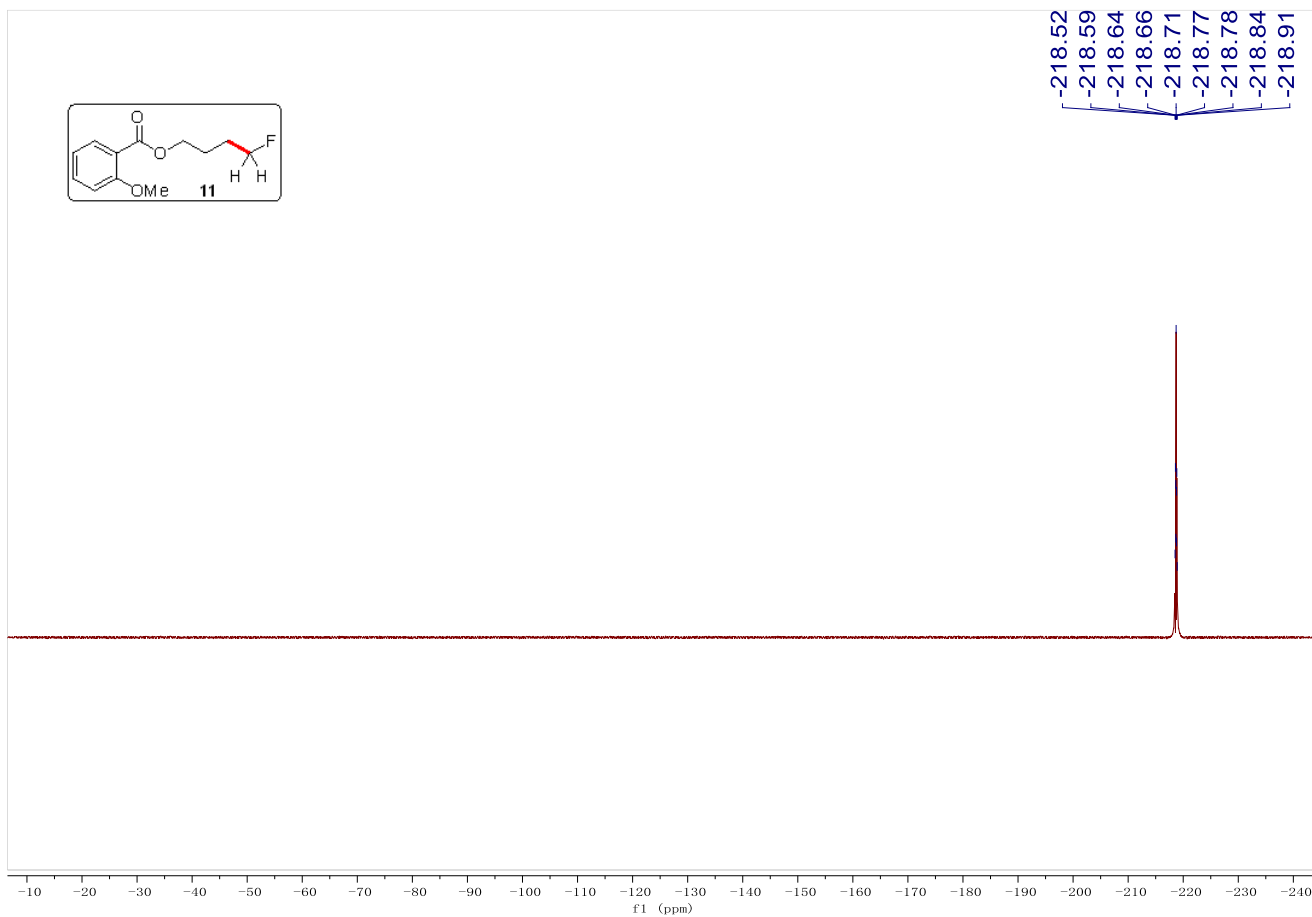

<sup>19</sup>F NMR Spectrum of of **11** (CDCl<sub>3</sub>, 376 MHz)

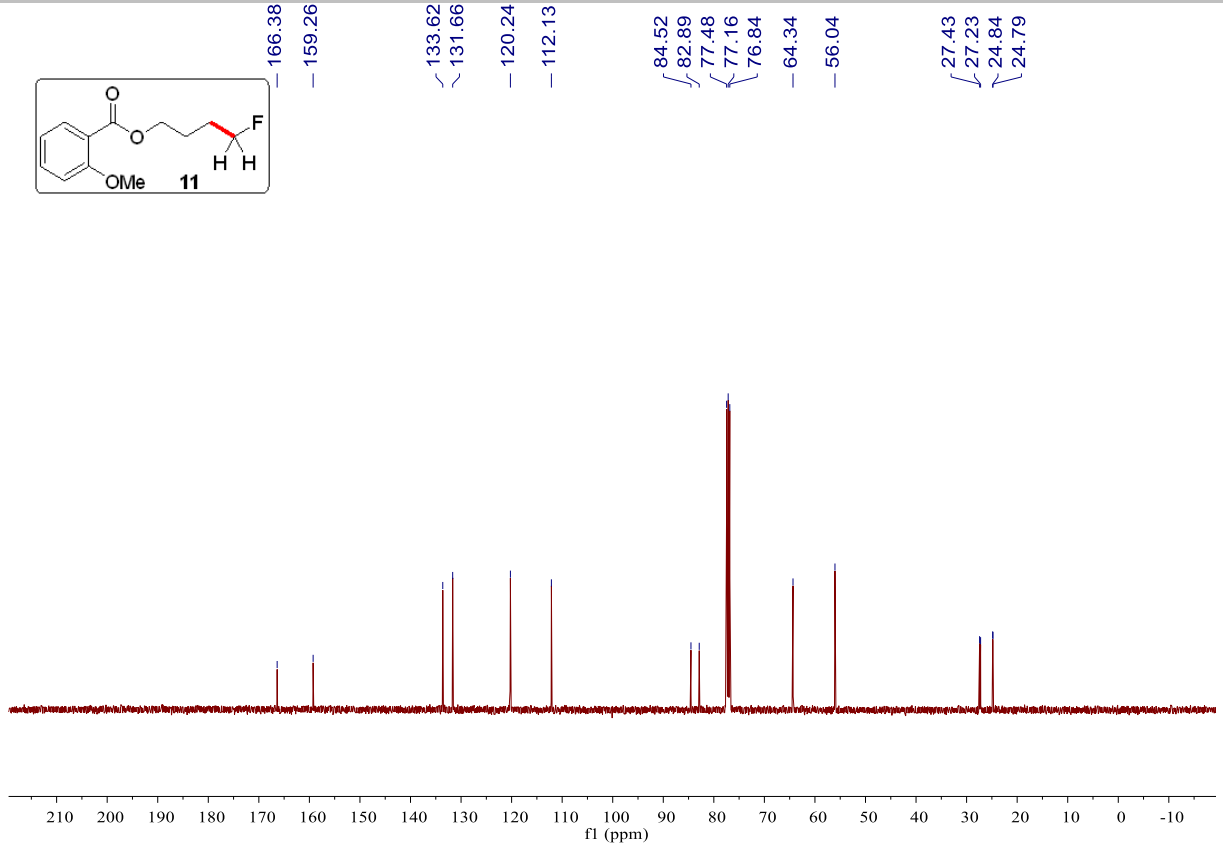

<sup>13</sup>C NMR Spectrum of of **11** (CDCl<sub>3</sub>, 101 MHz)

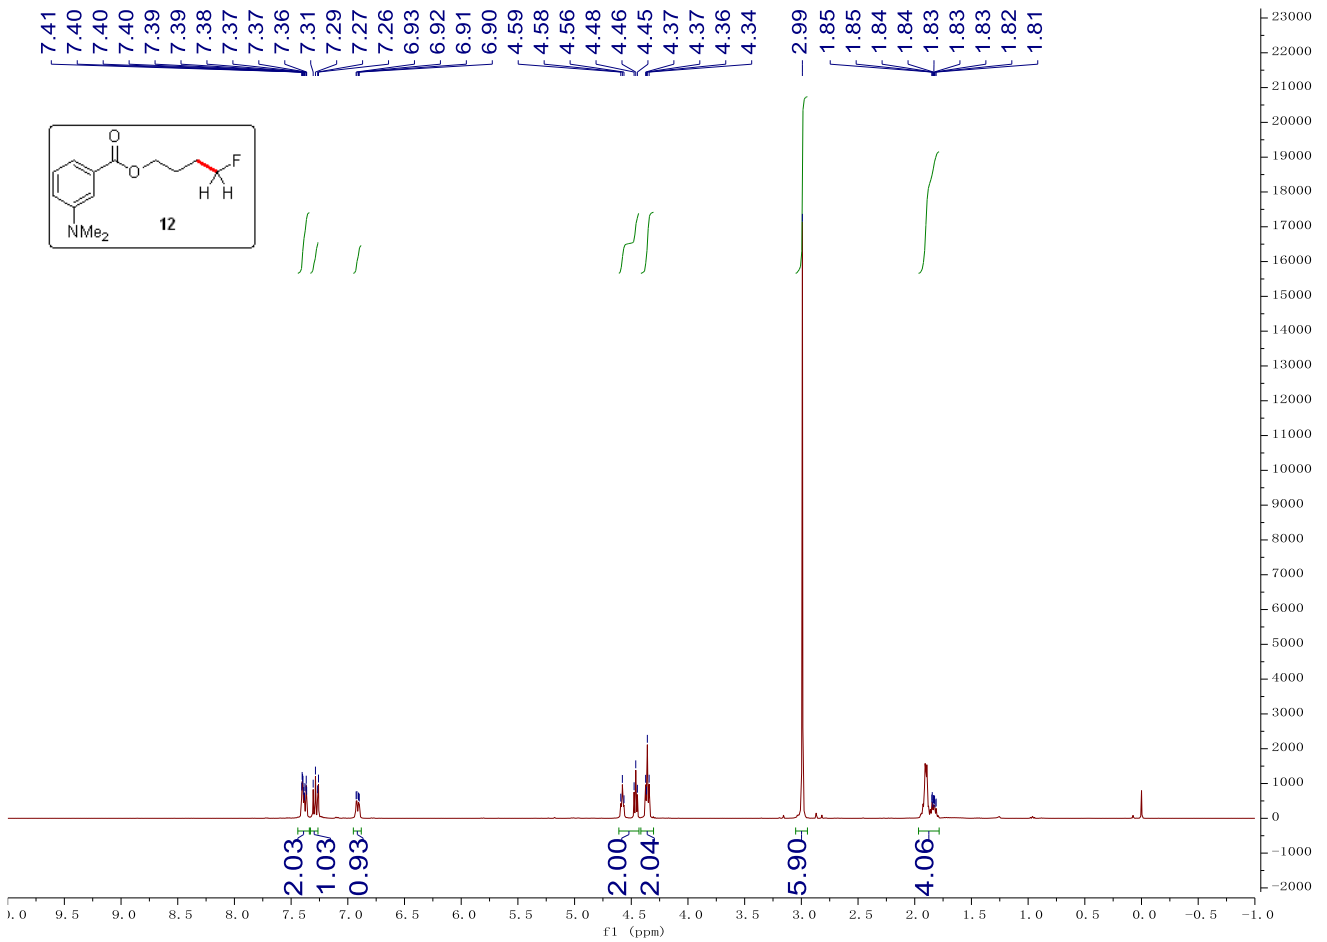

$^1\text{H}$  NMR Spectrum of of **12** ( $\text{CDCl}_3$ , 400 MHz)

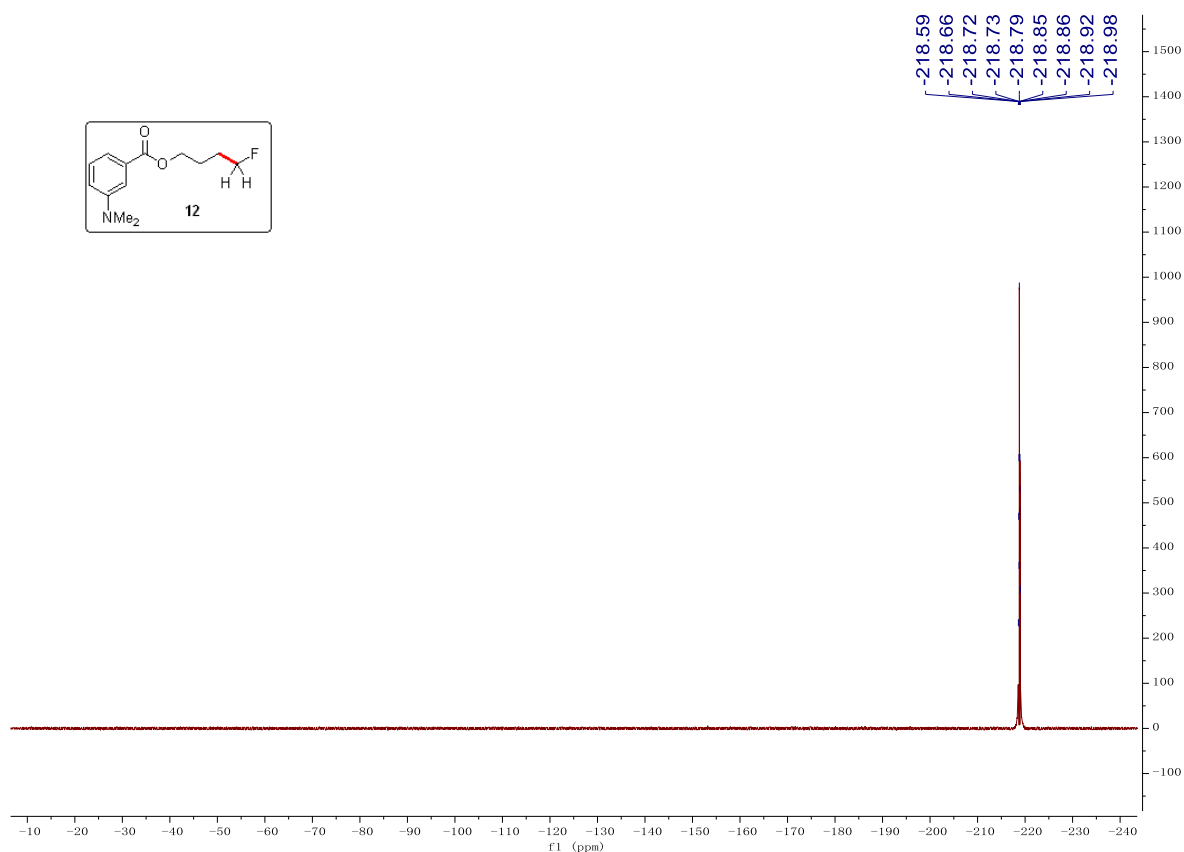

$^{19}\text{F}$  NMR Spectrum of of **12** ( $\text{CDCl}_3$ , 376 MHz)

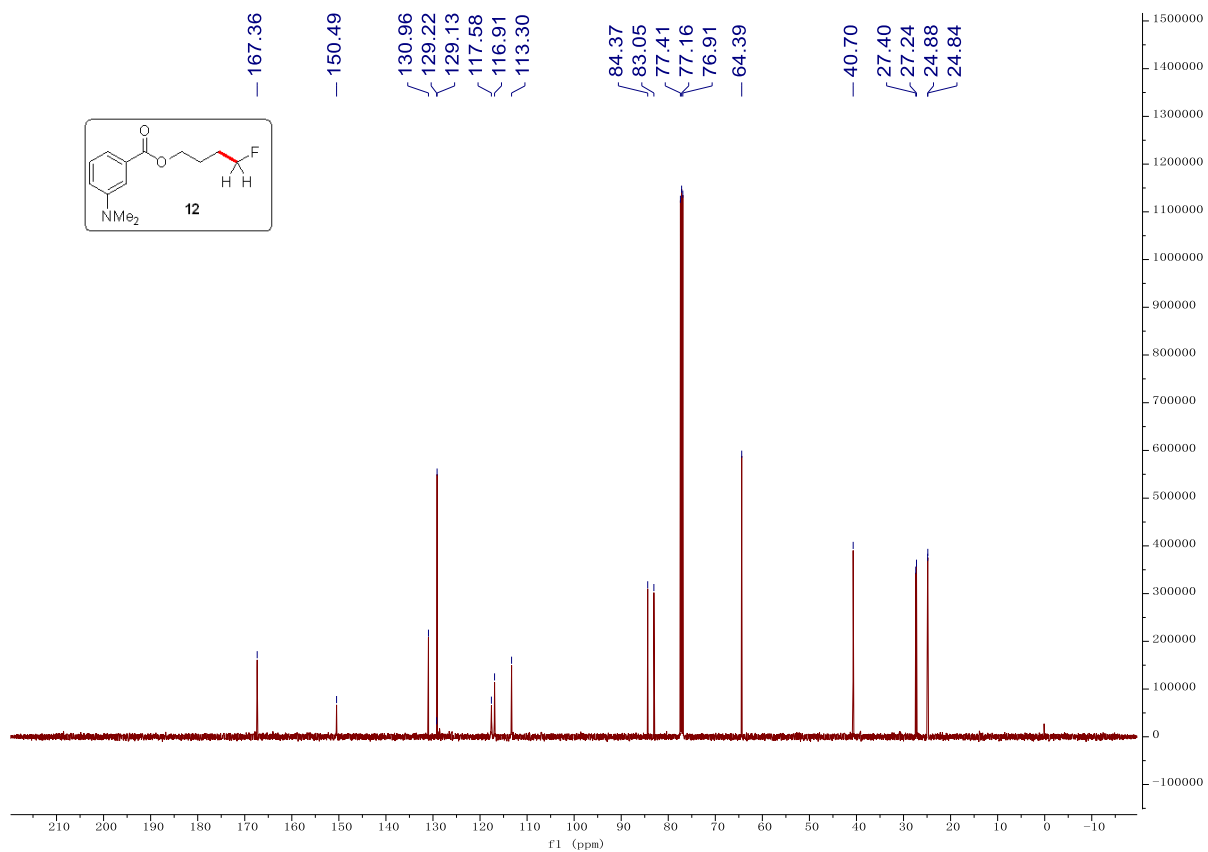

$^{13}\text{C}$  NMR Spectrum of of **12** ( $\text{CDCl}_3$ , 126 MHz)

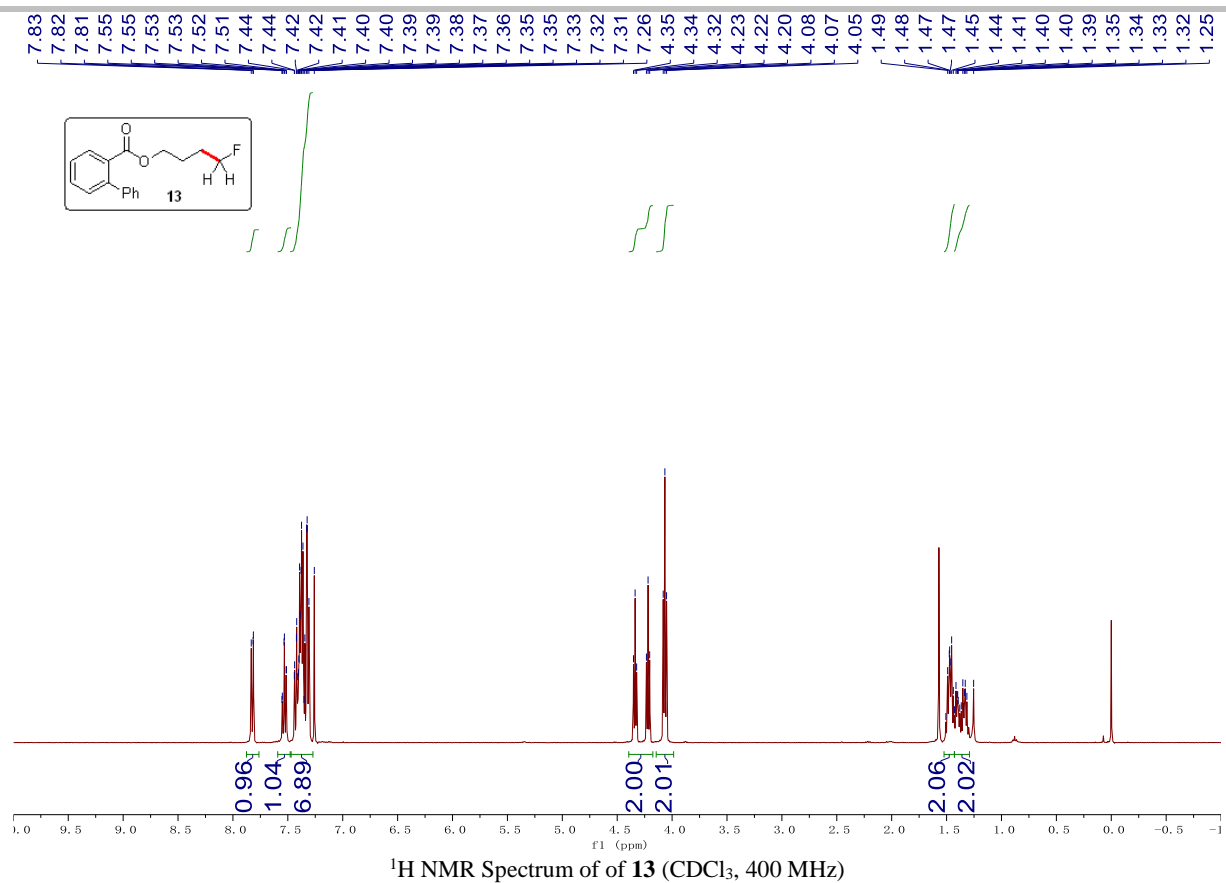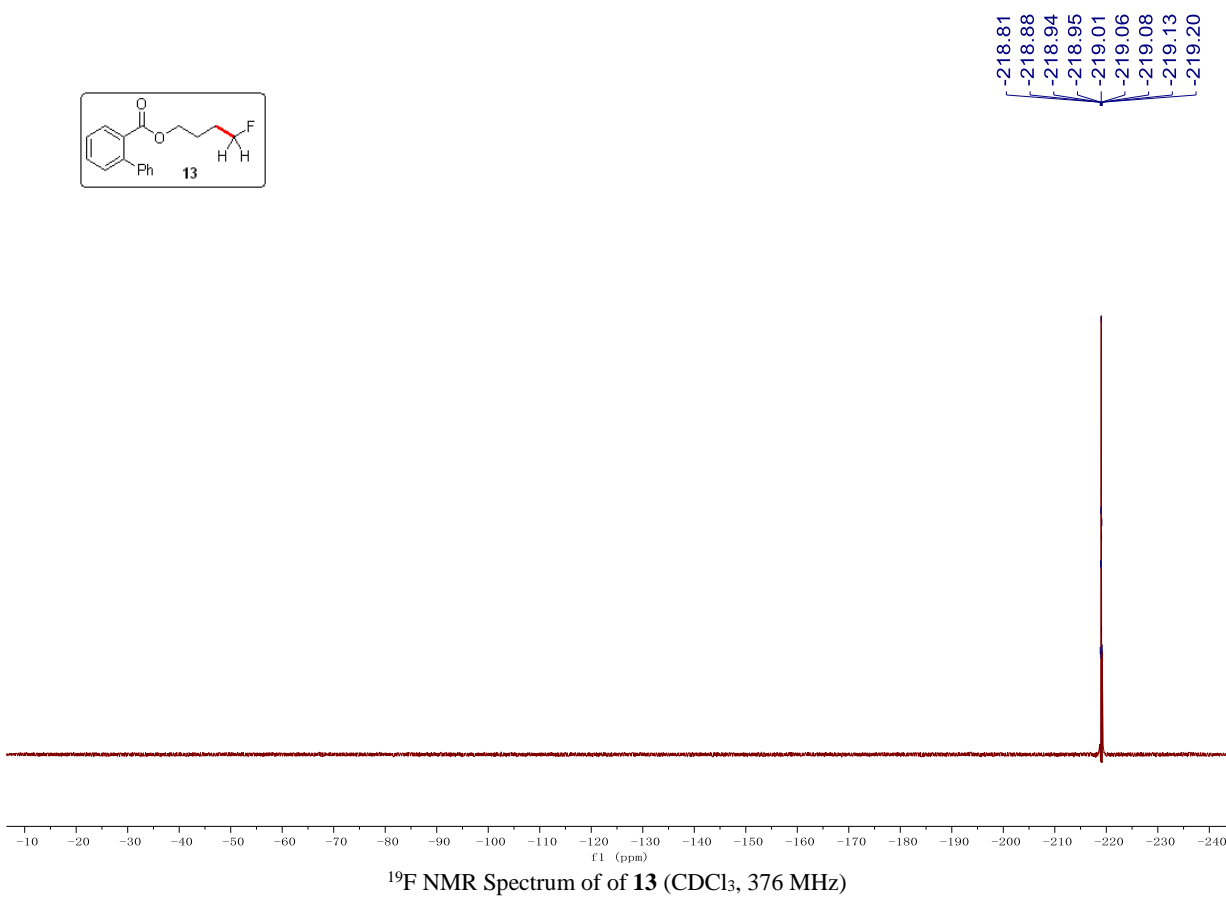

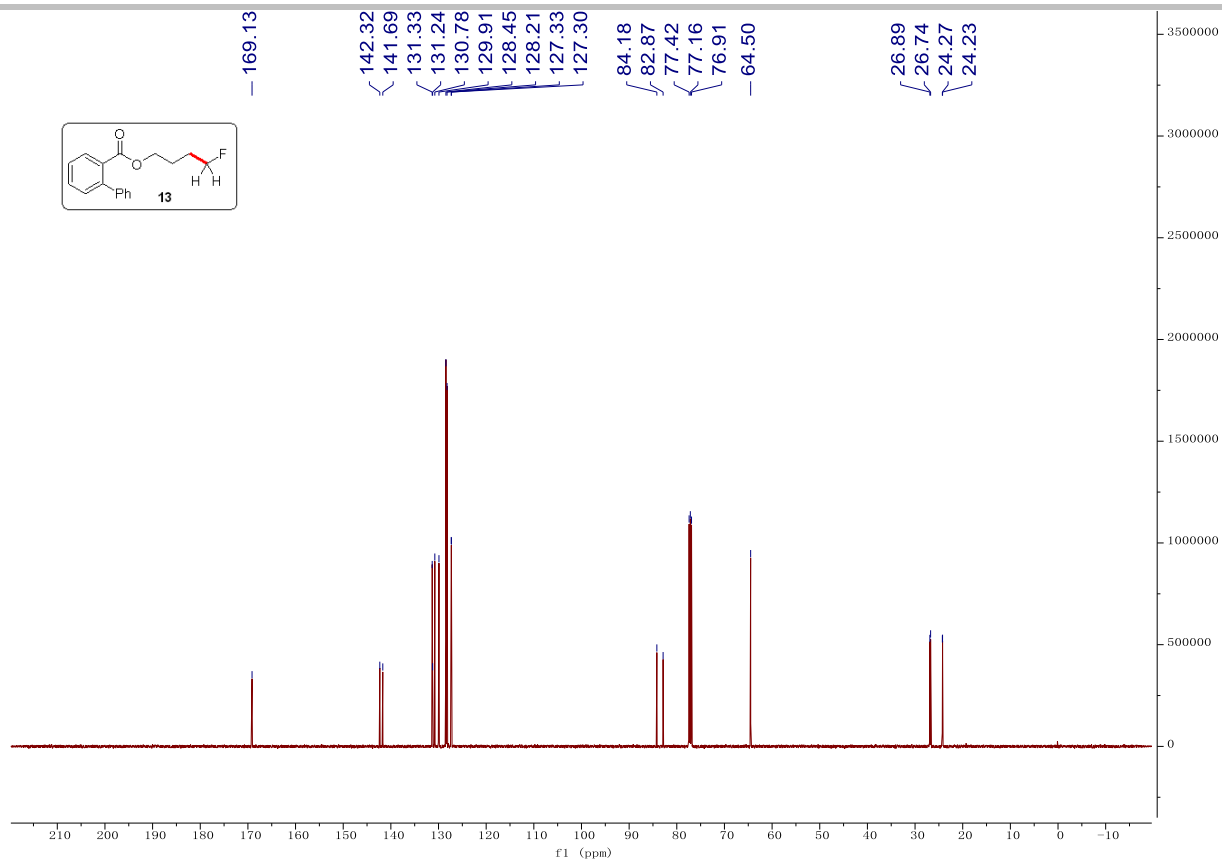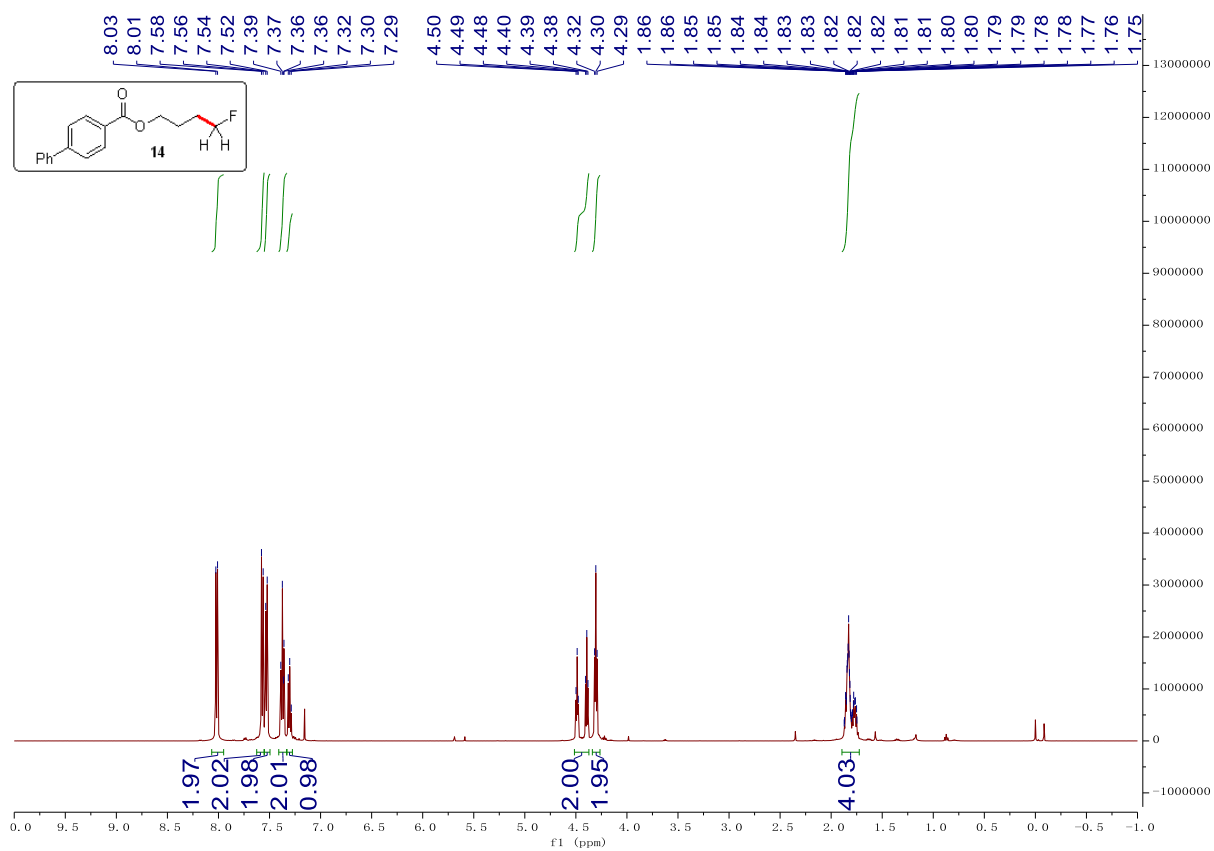



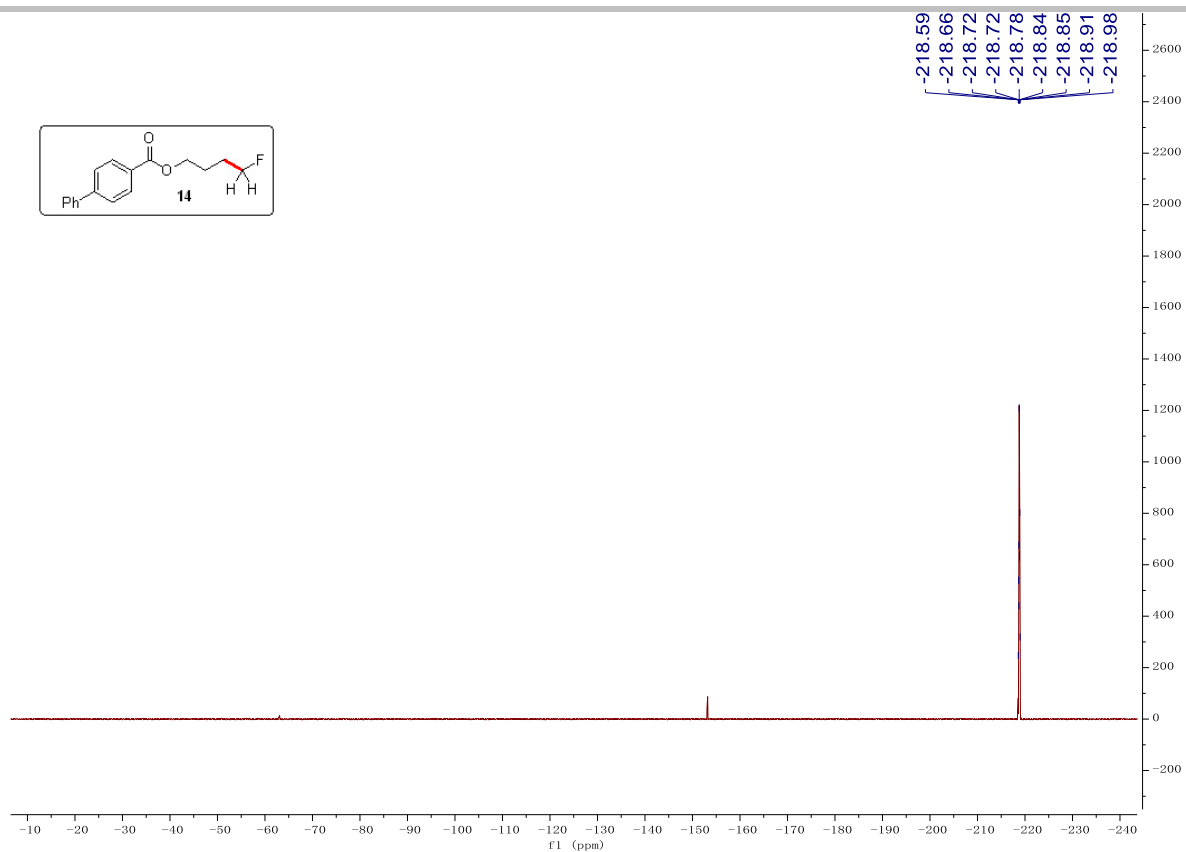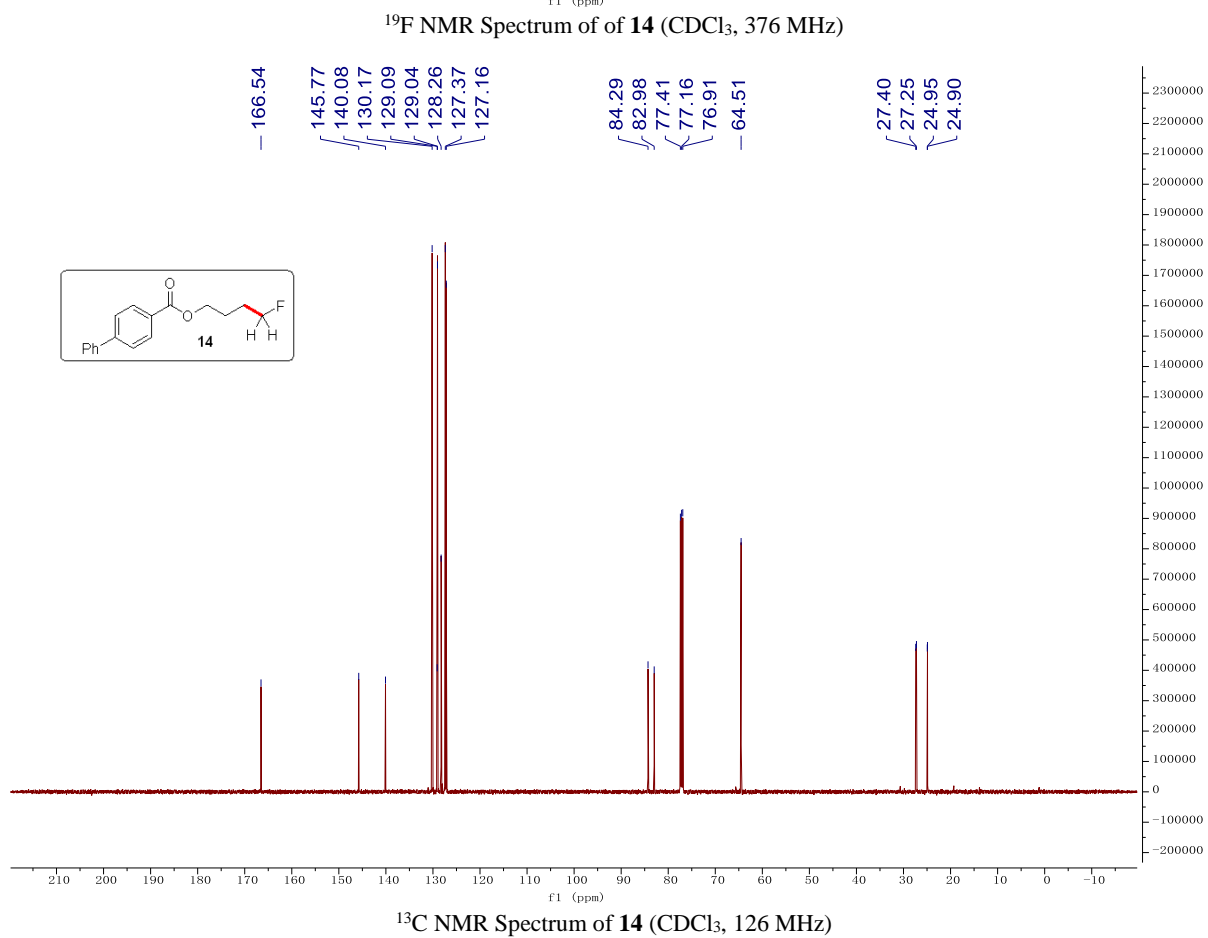

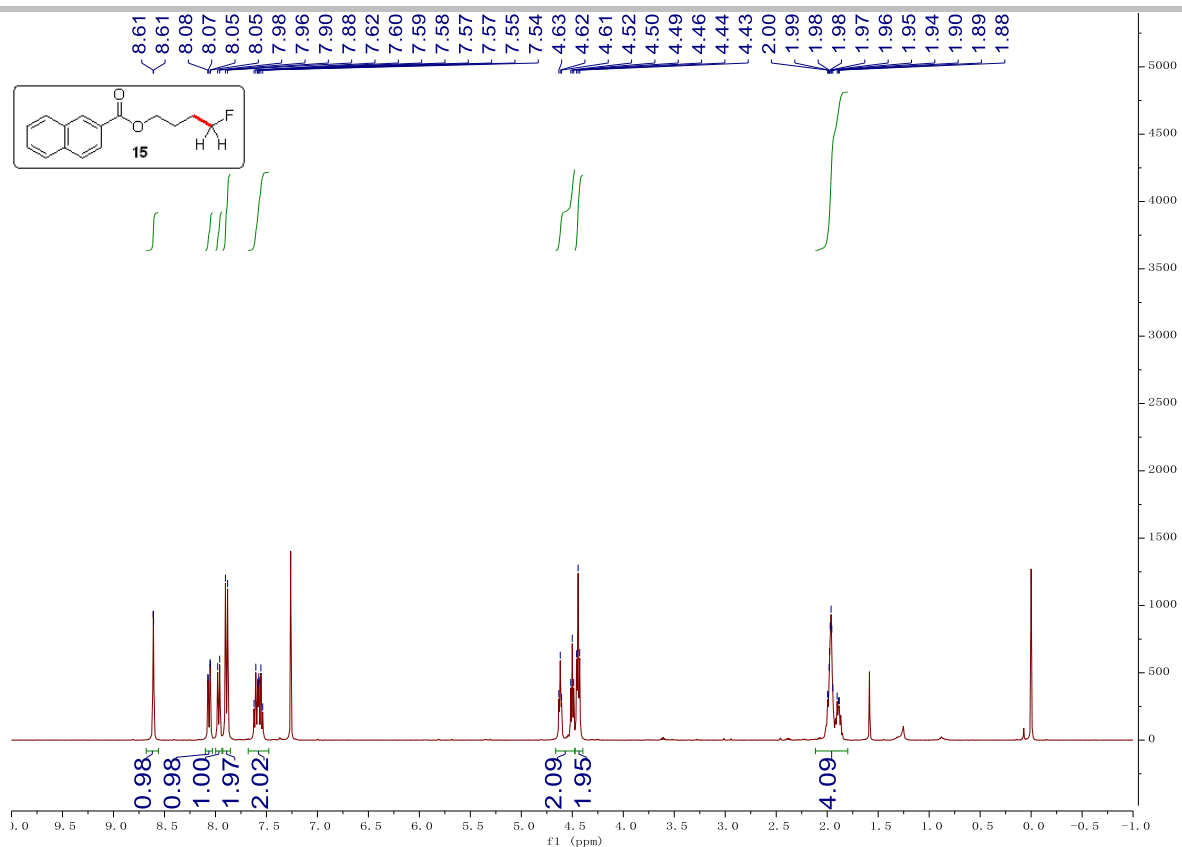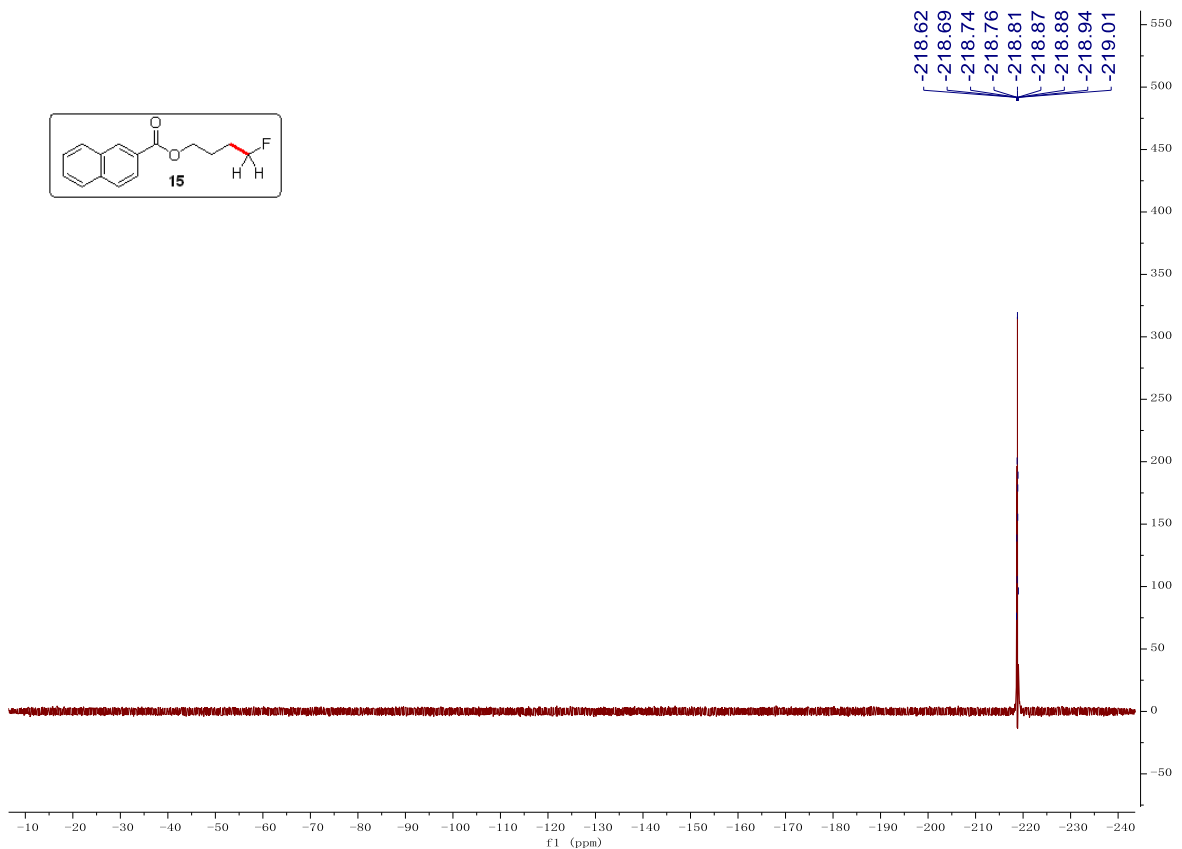

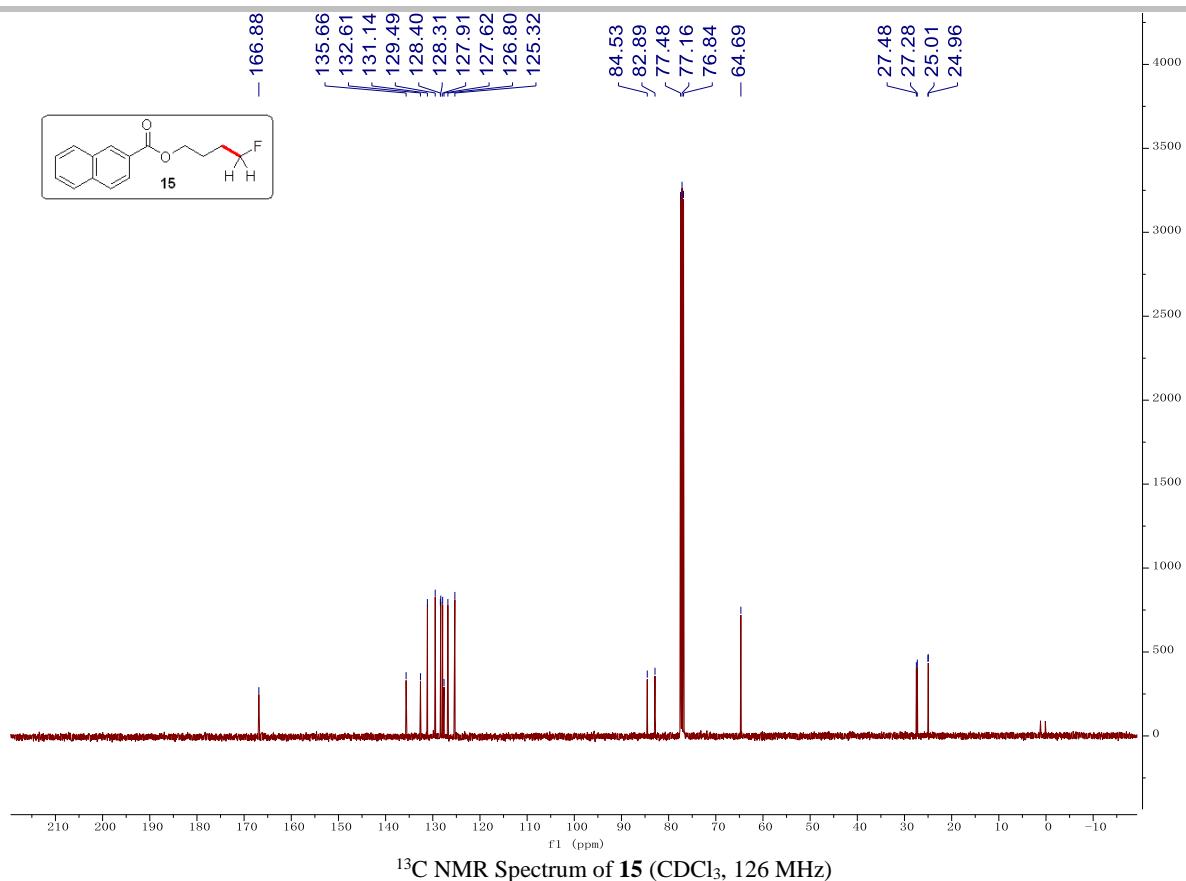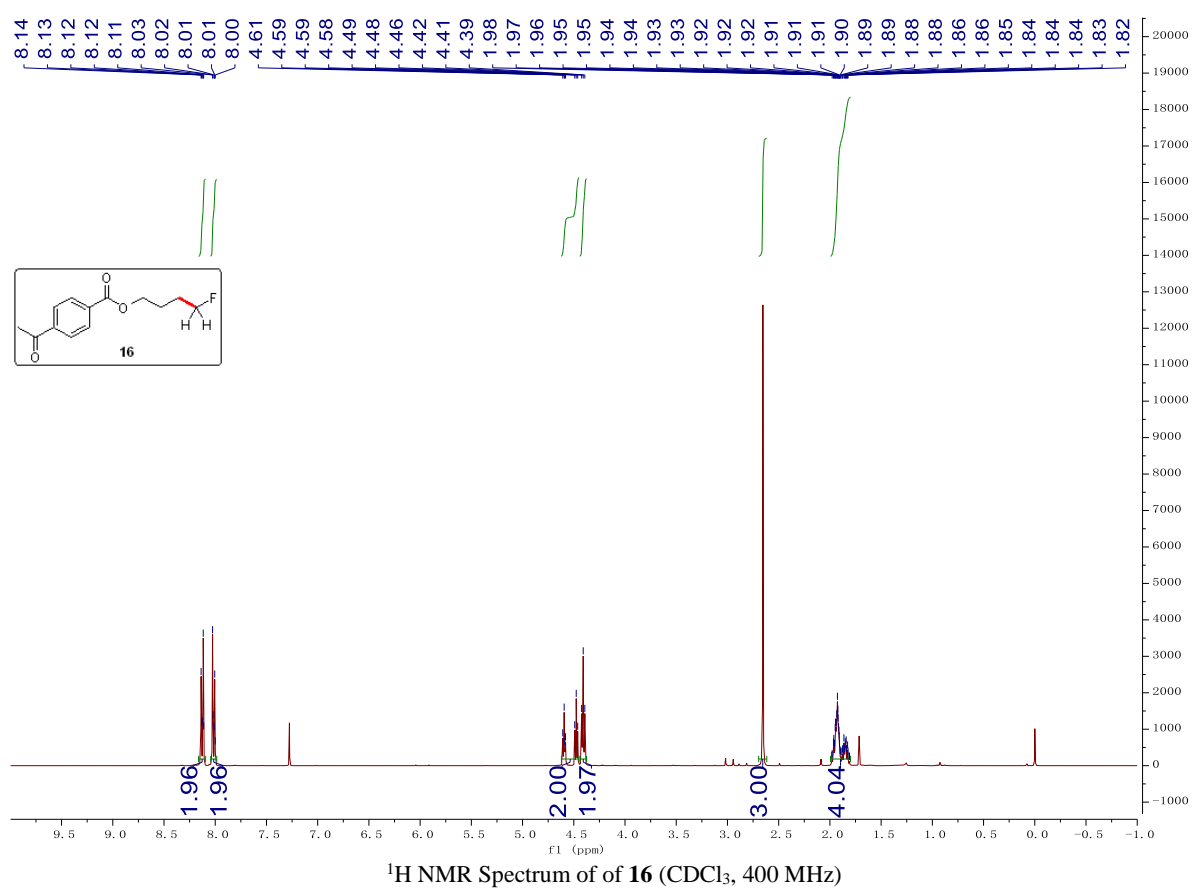

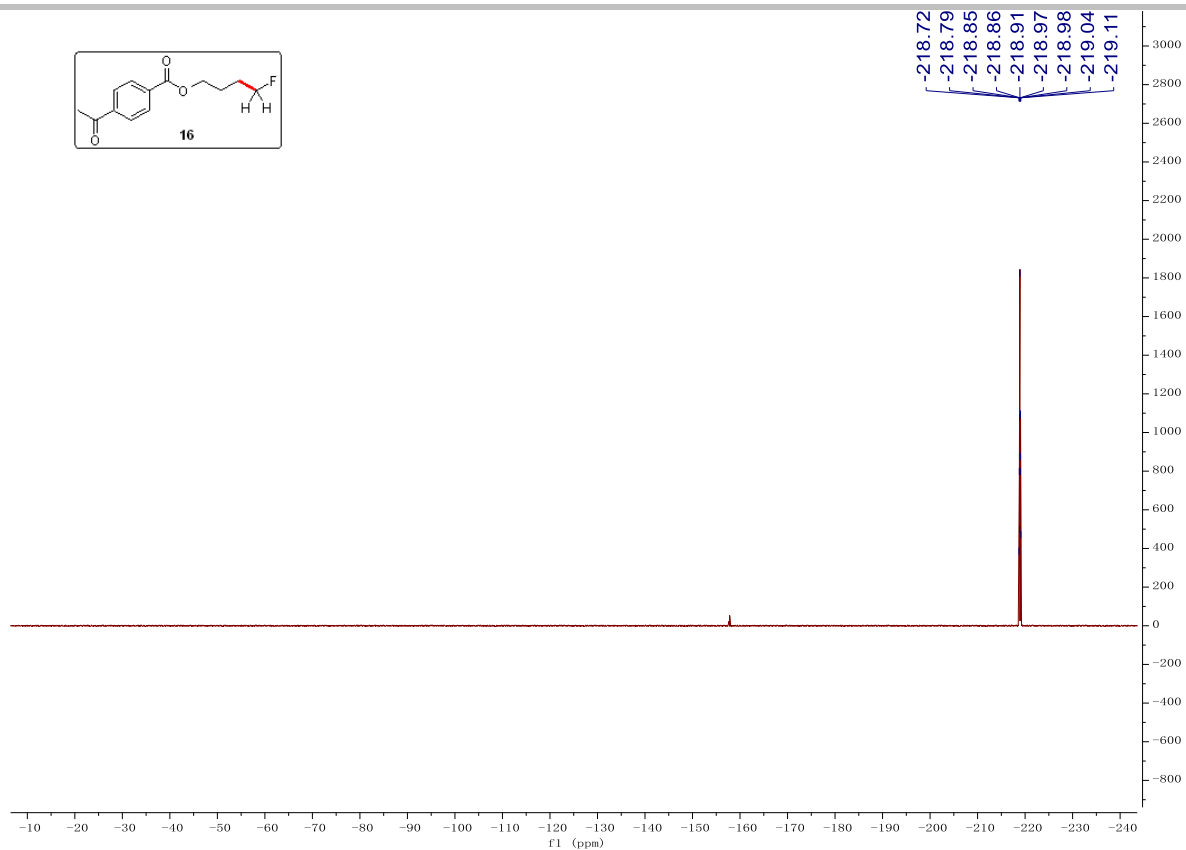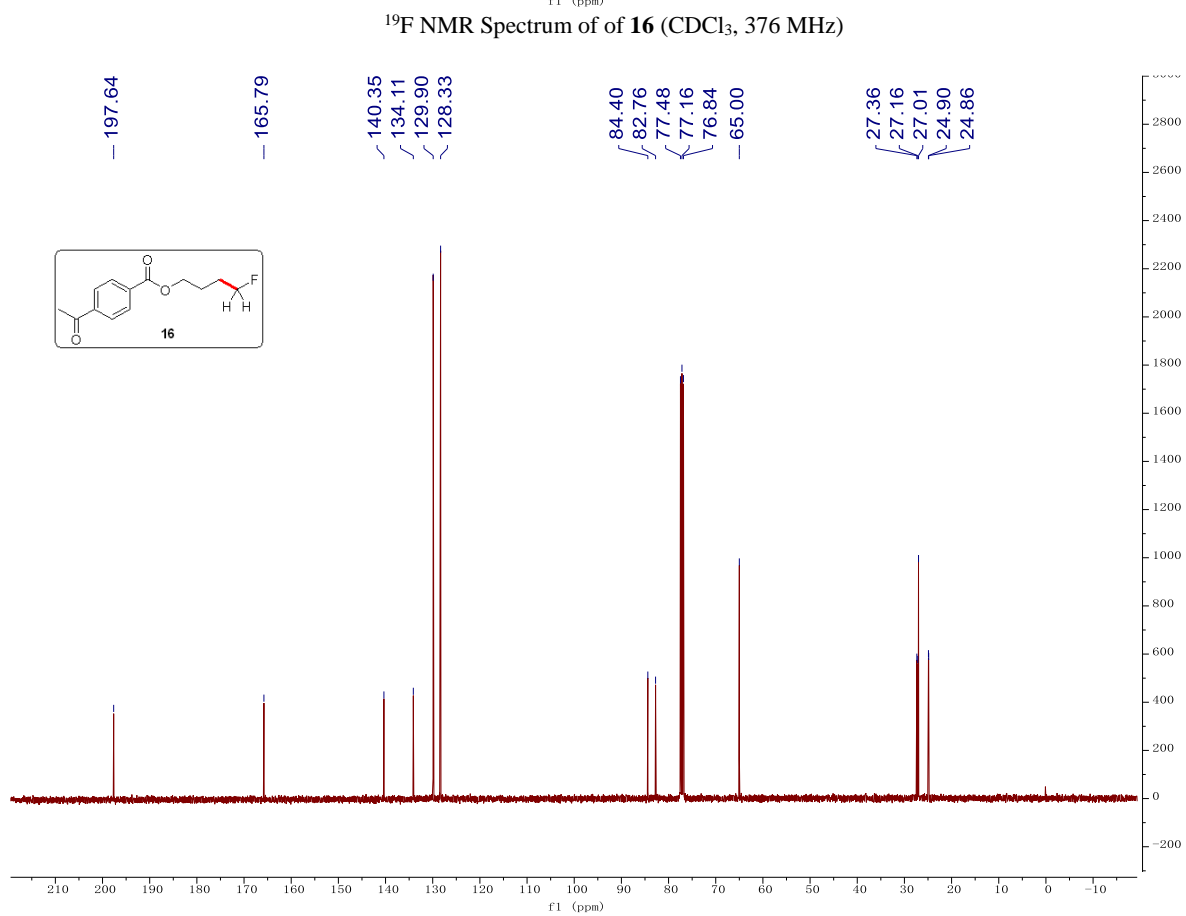

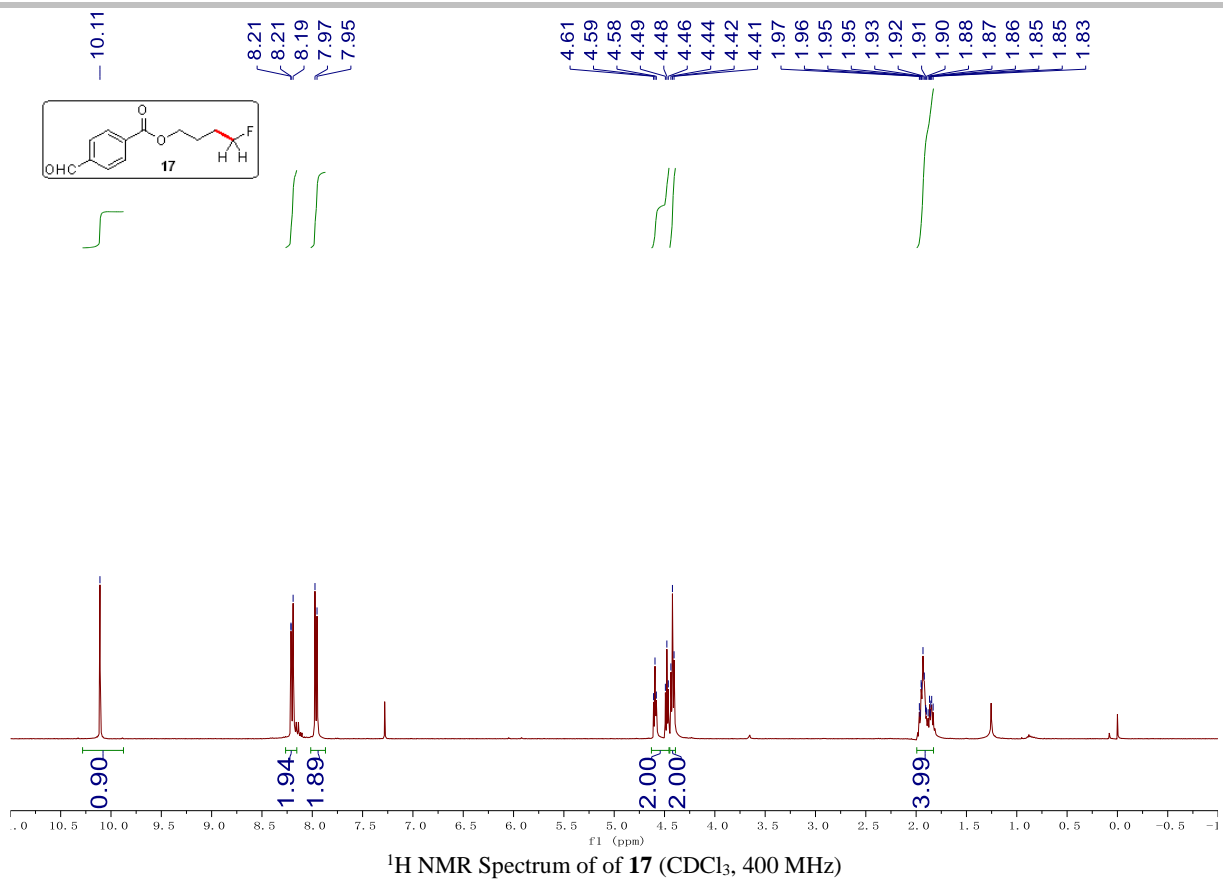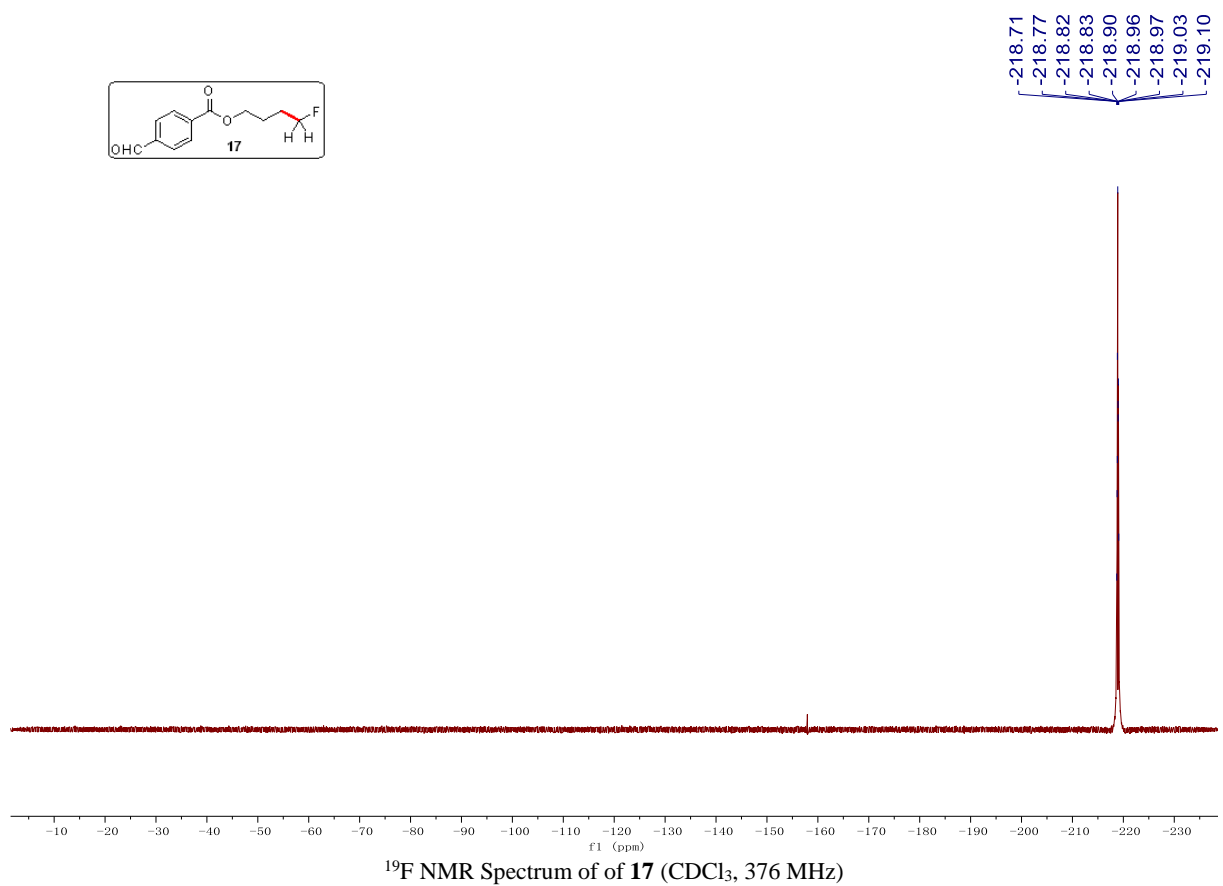

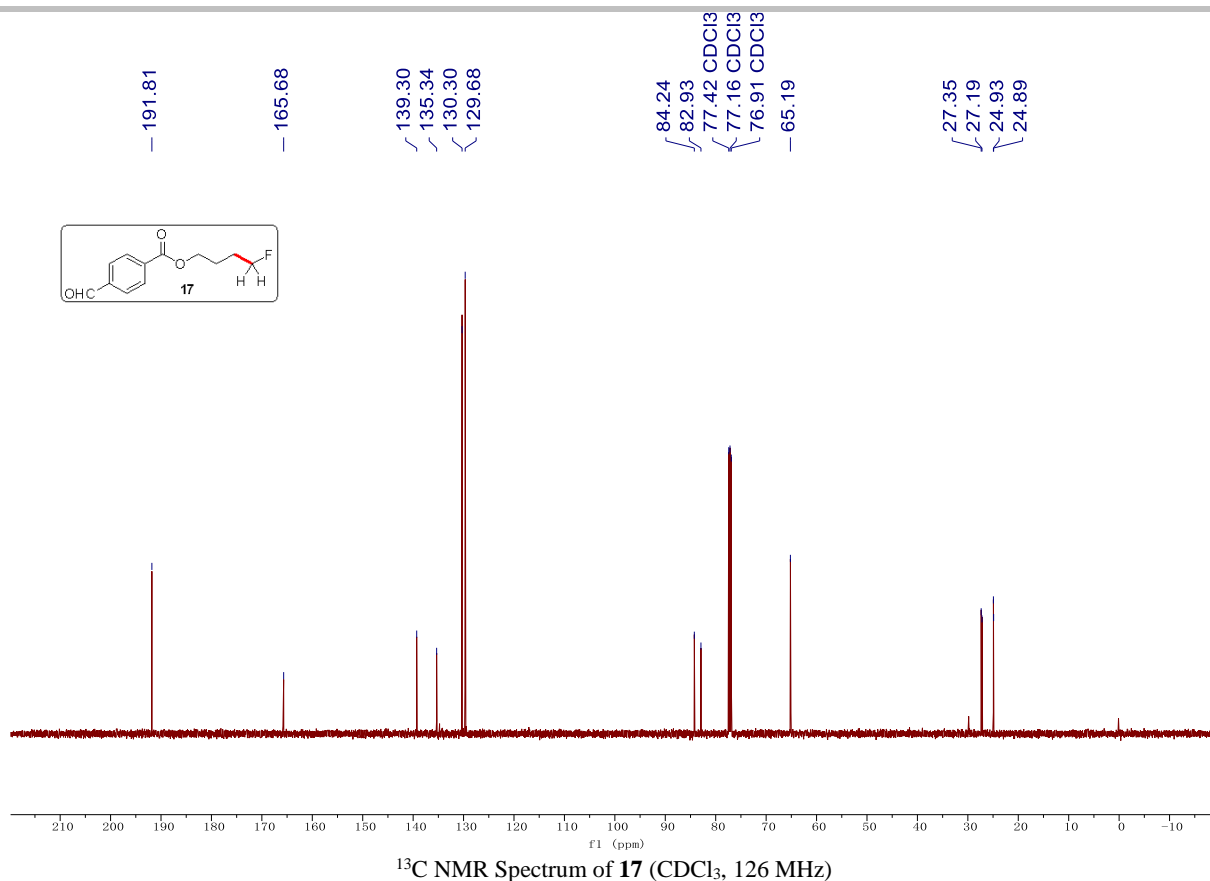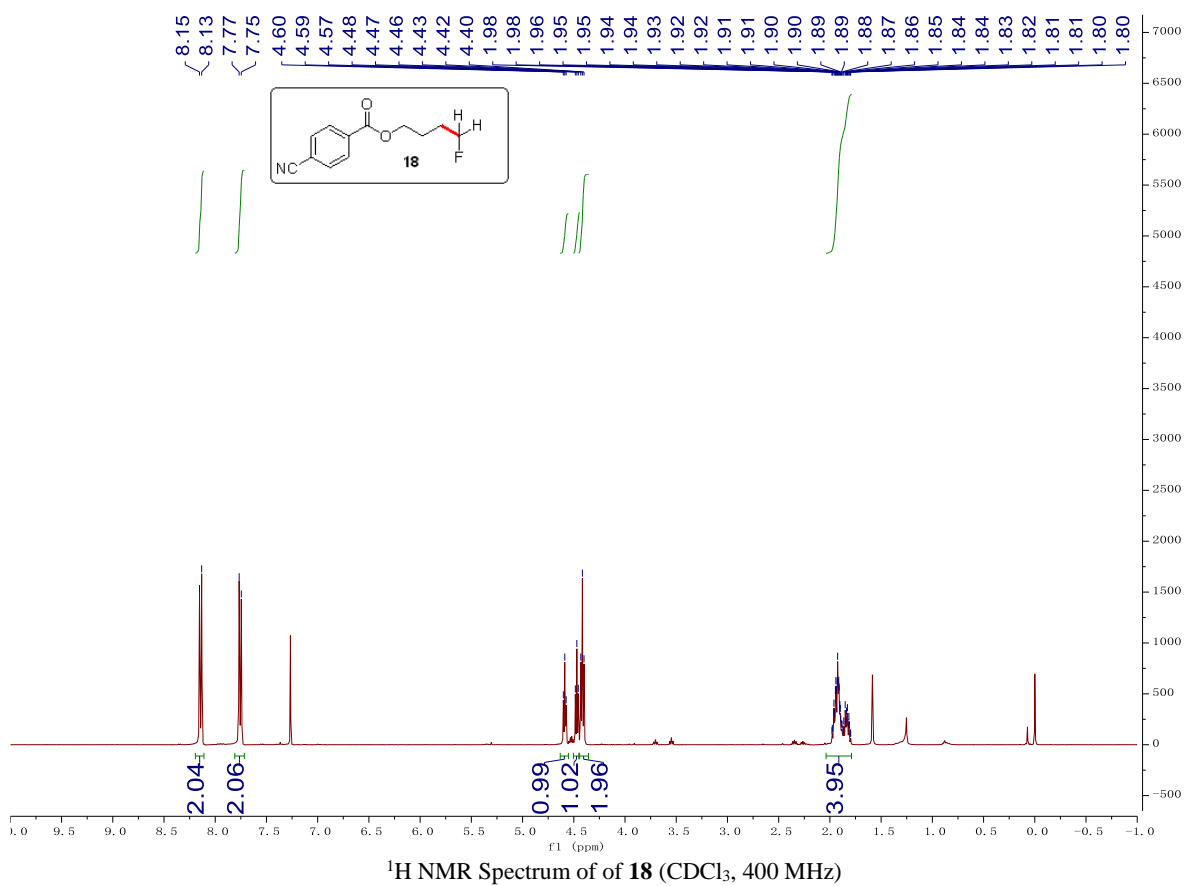

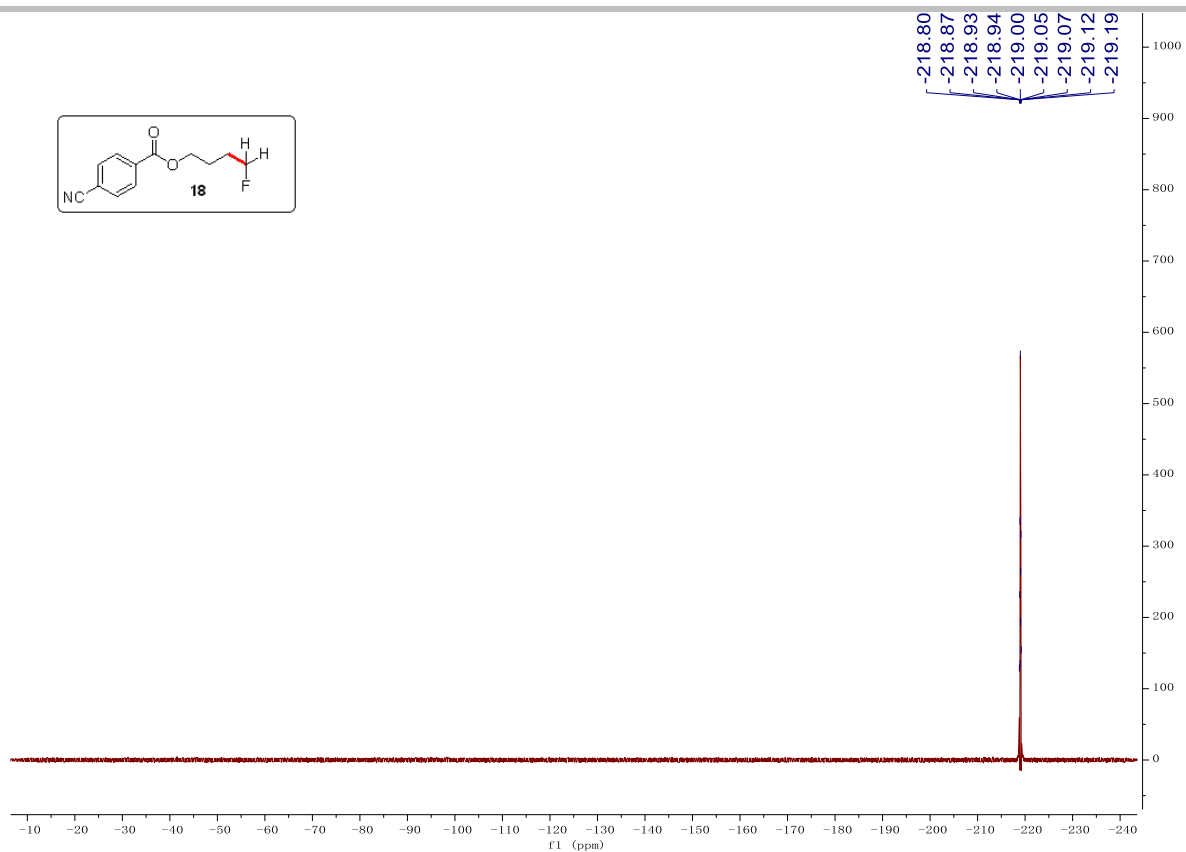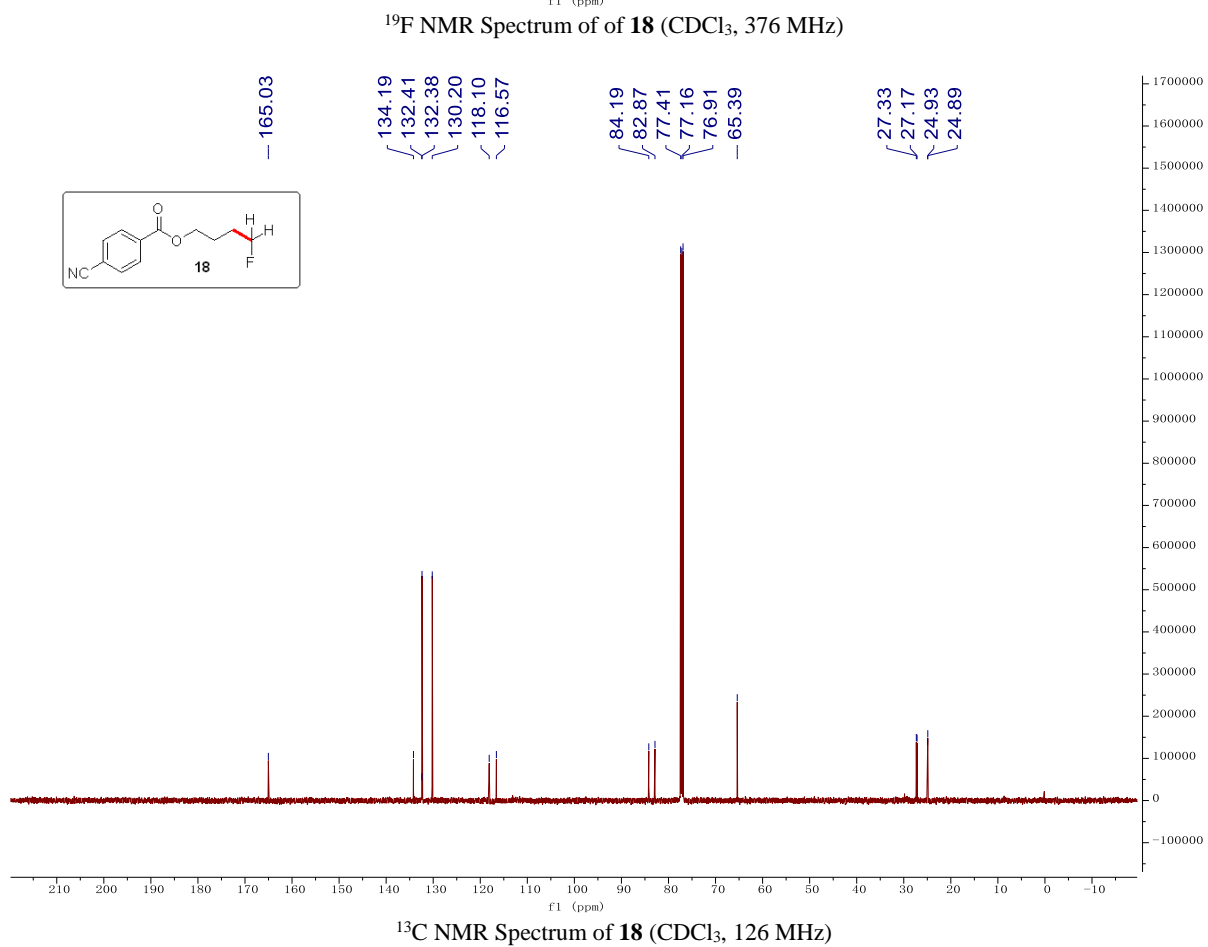

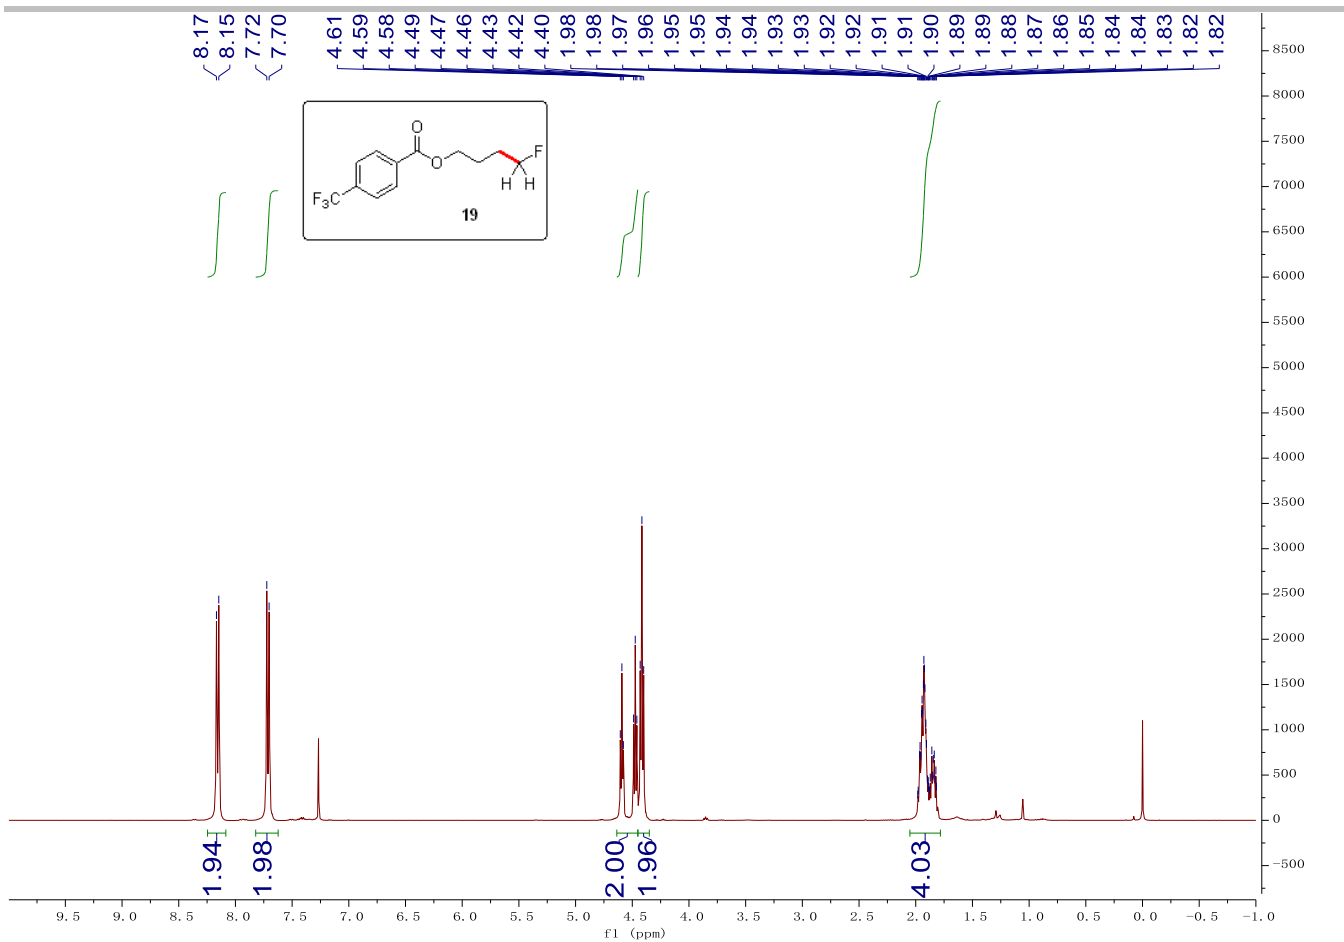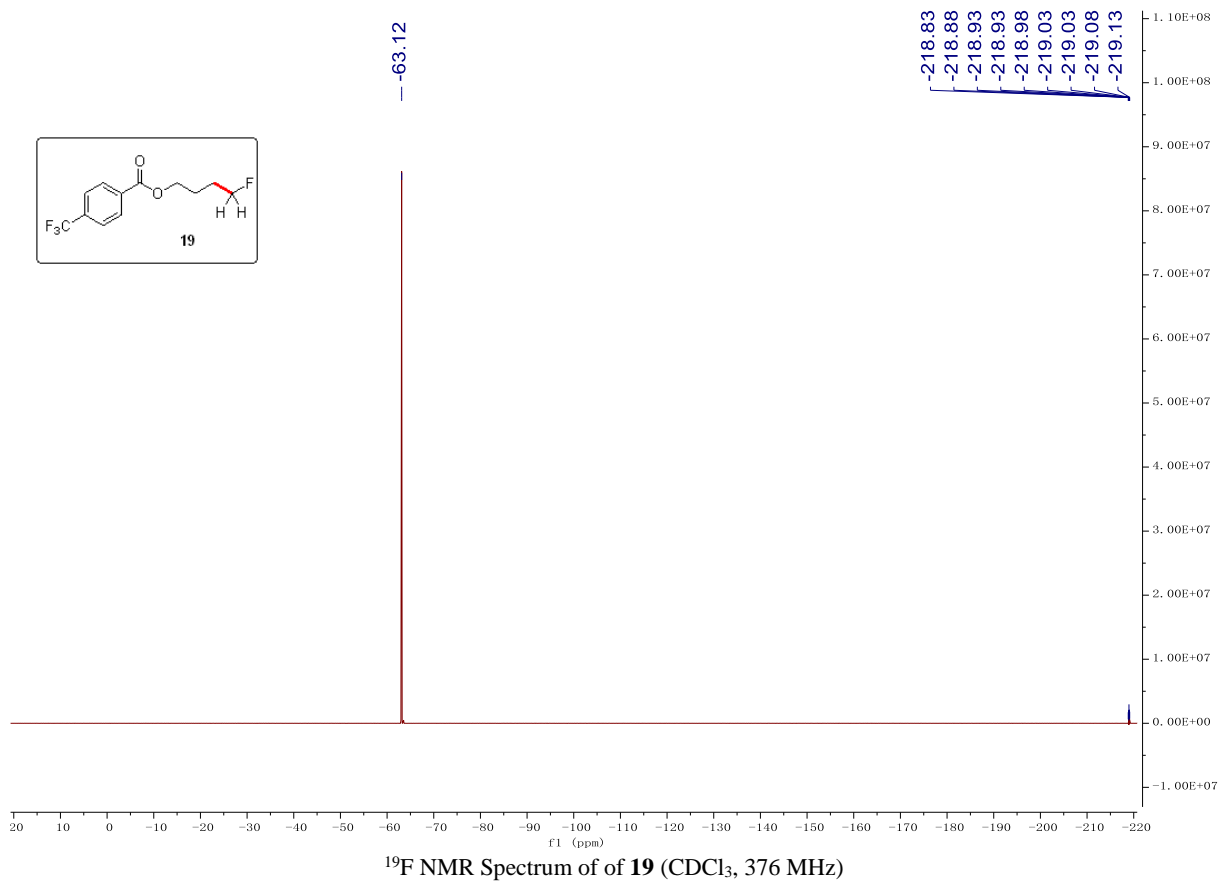



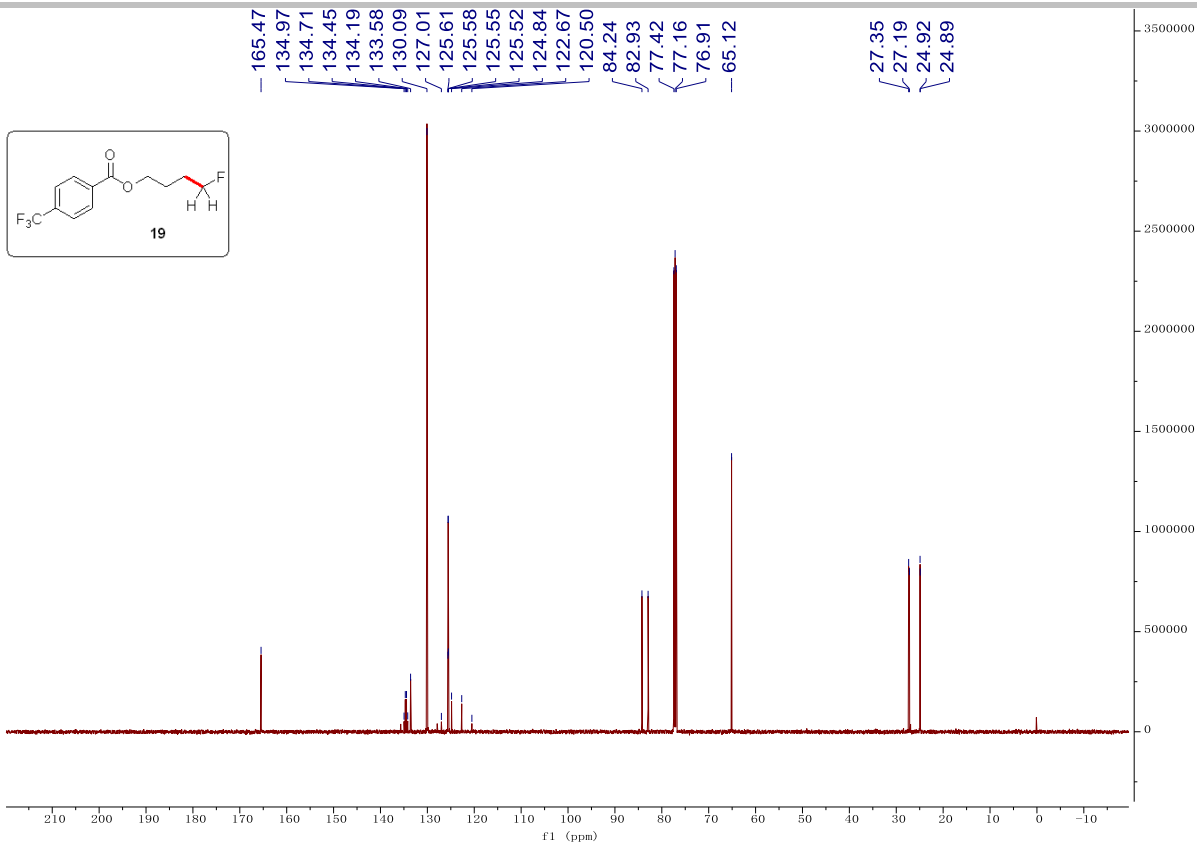

<sup>13</sup>C NMR Spectrum of **19** (CDCl<sub>3</sub>, 126 MHz)

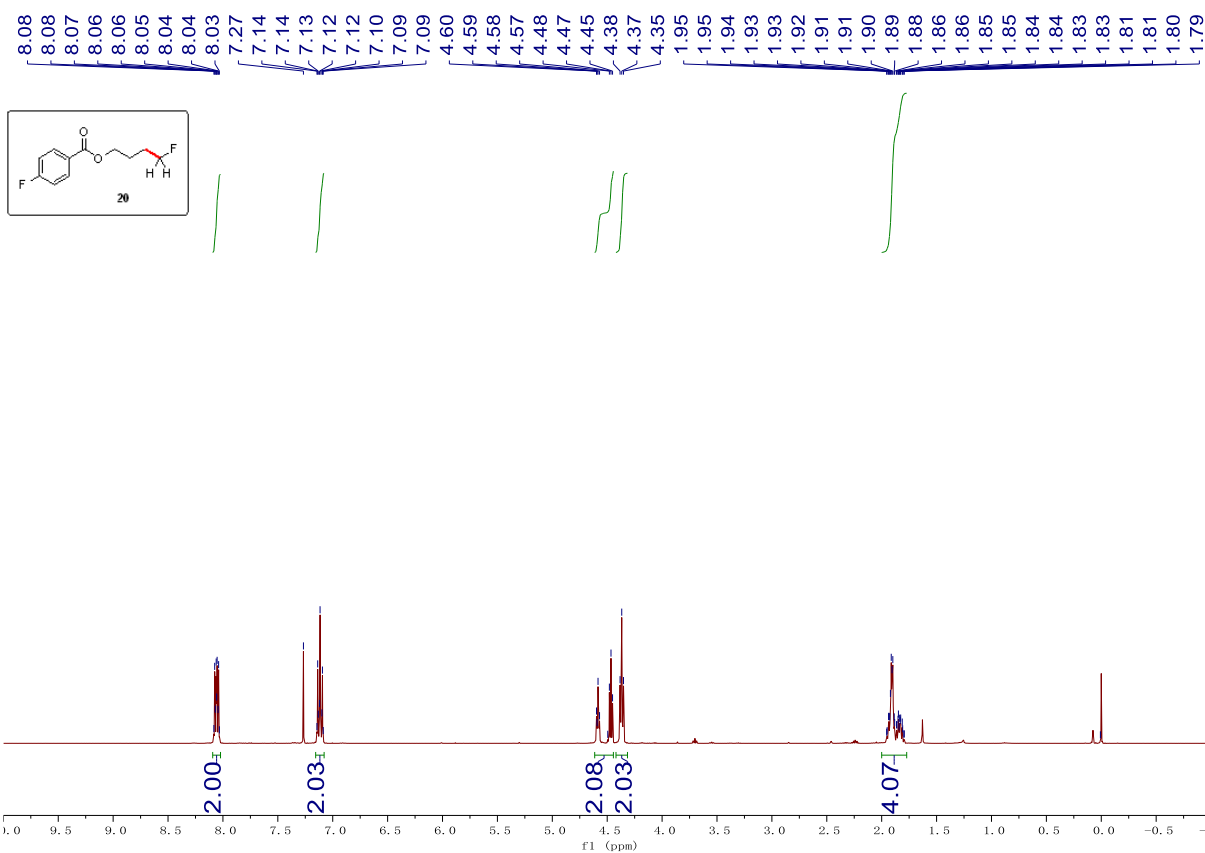

<sup>1</sup>H NMR Spectrum of **20** (CDCl<sub>3</sub>, 400 MHz)

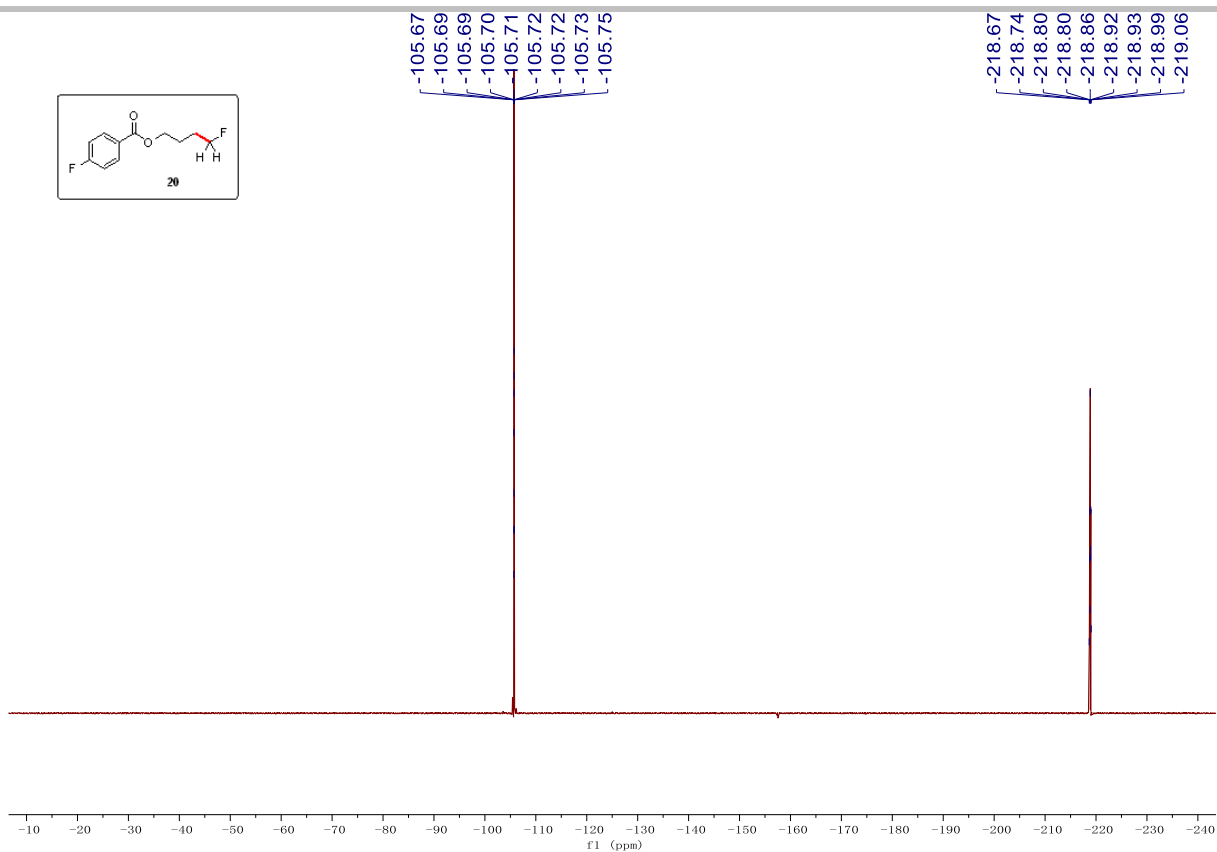

<sup>19</sup>F NMR Spectrum of **20** (CDCl<sub>3</sub>, 376 MHz)

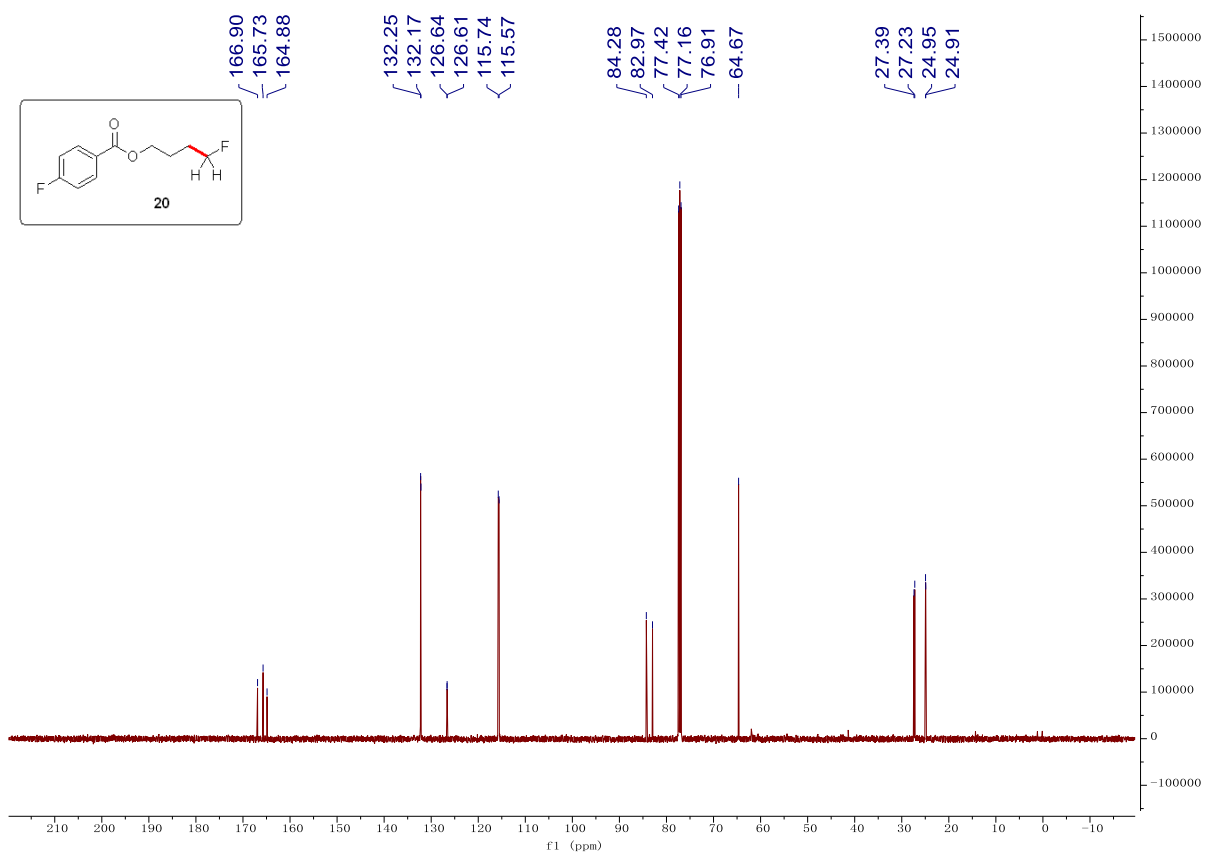

<sup>13</sup>C NMR Spectrum of **20** (CDCl<sub>3</sub>, 126 MHz)

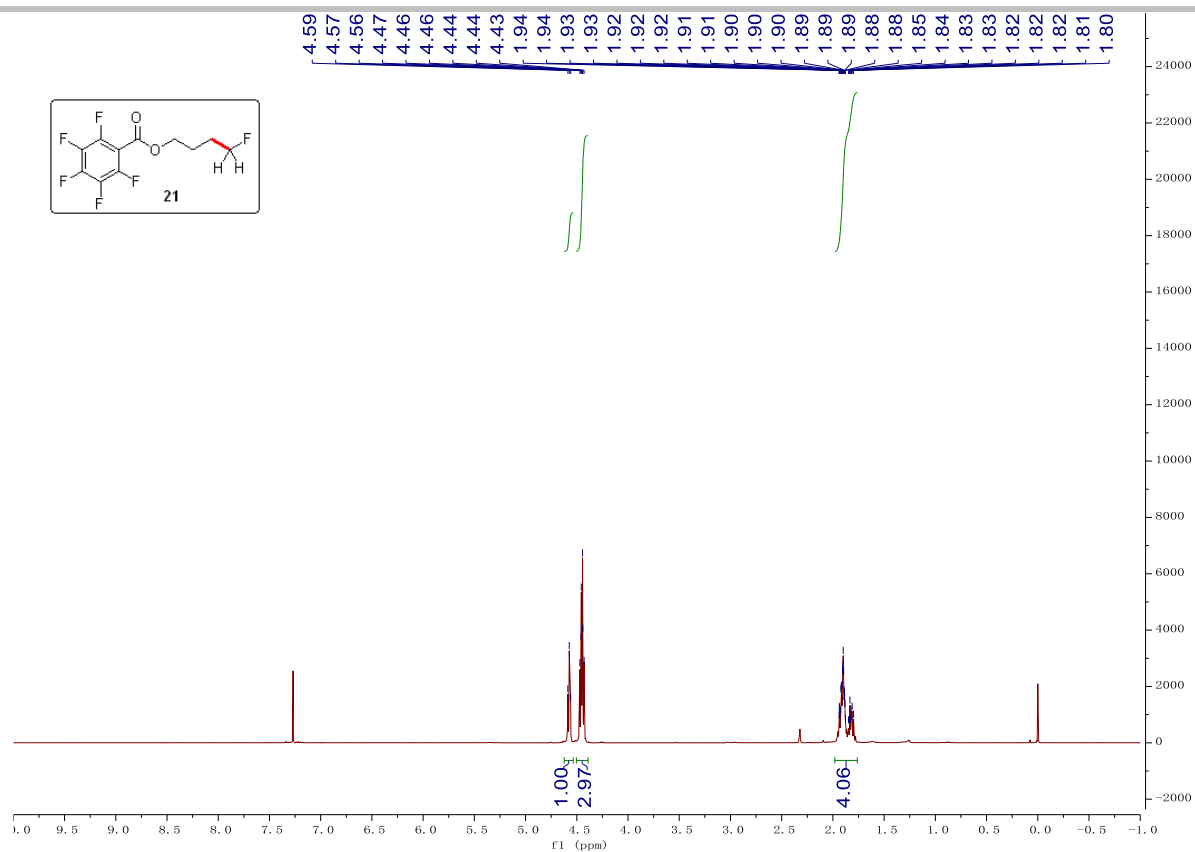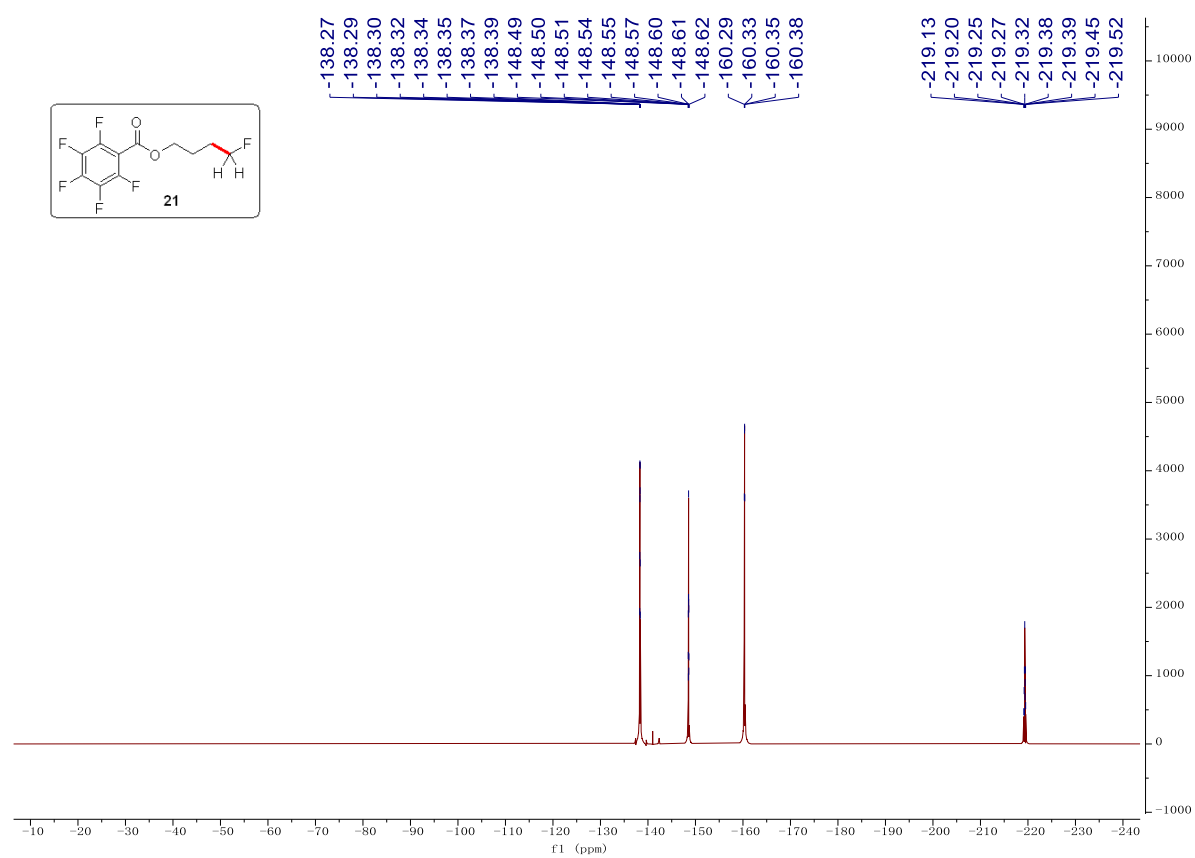

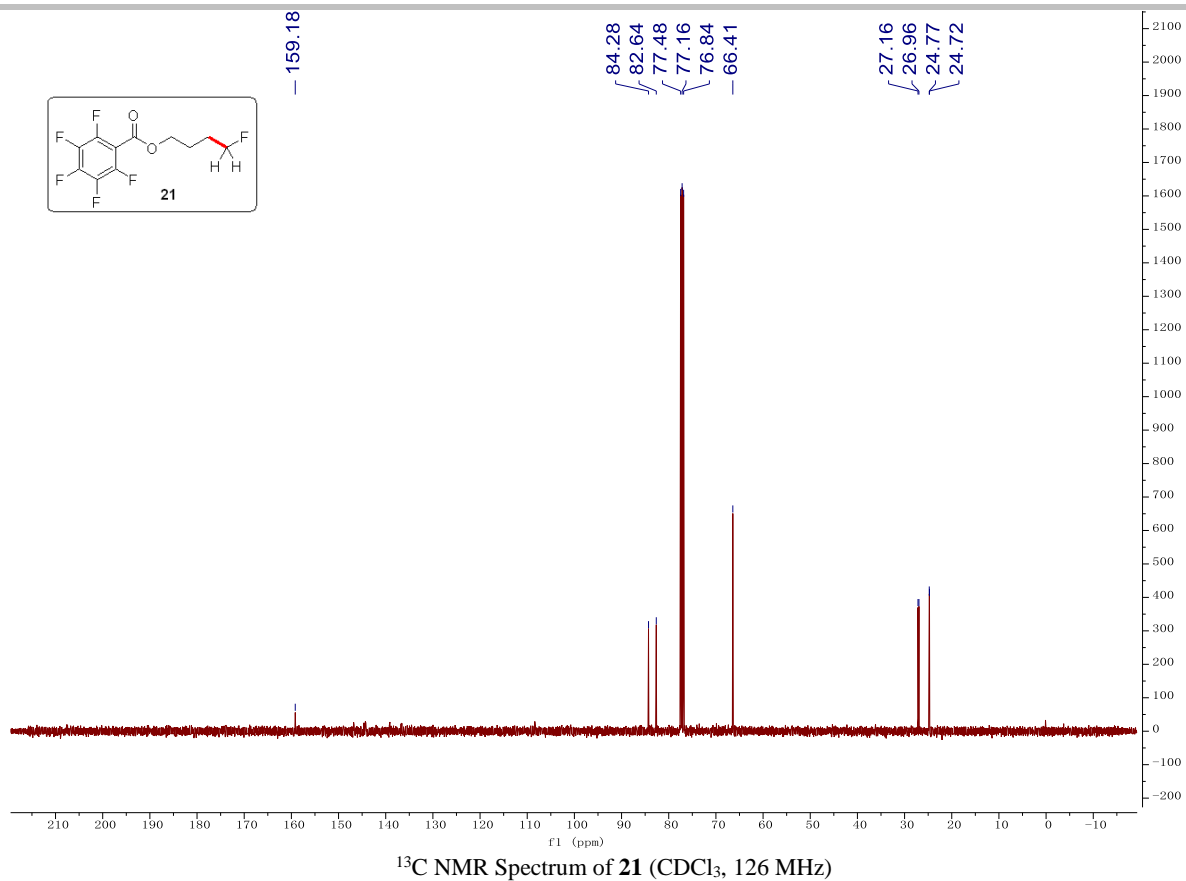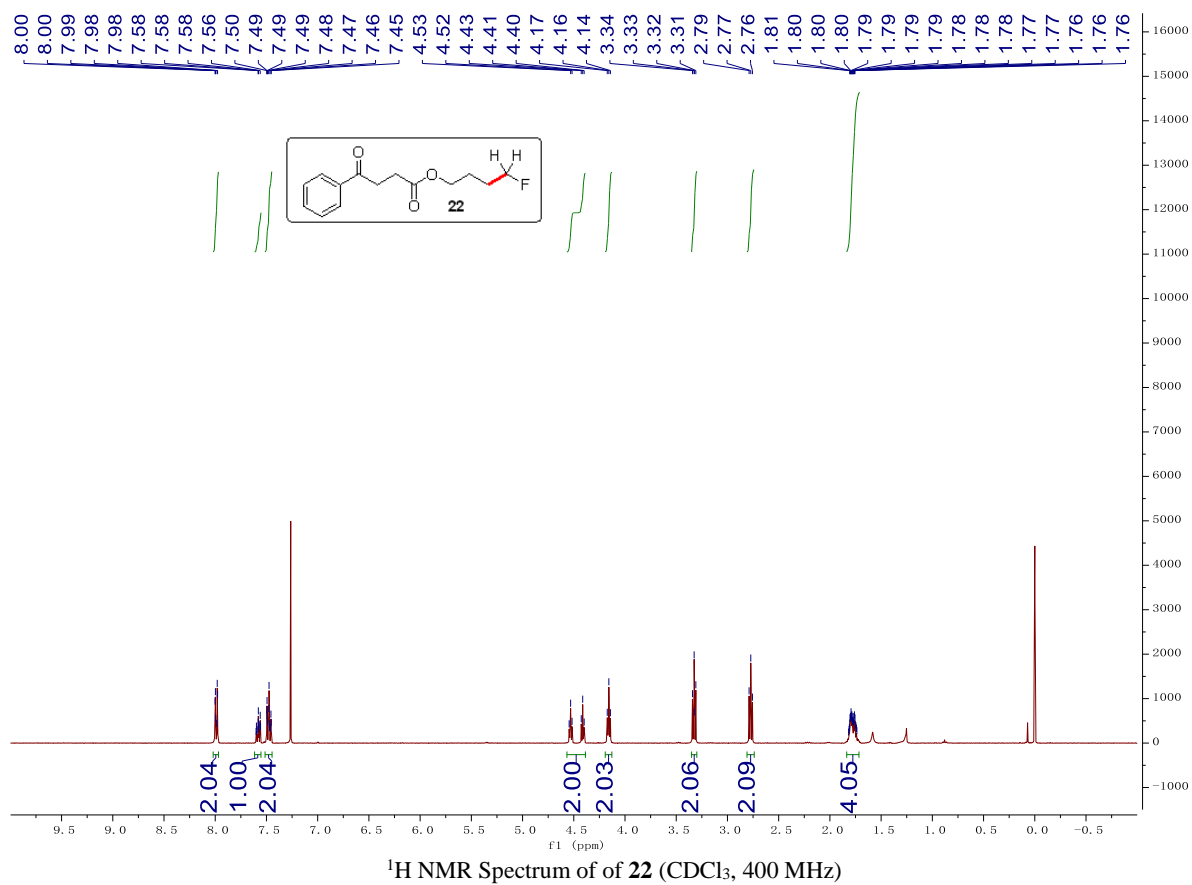

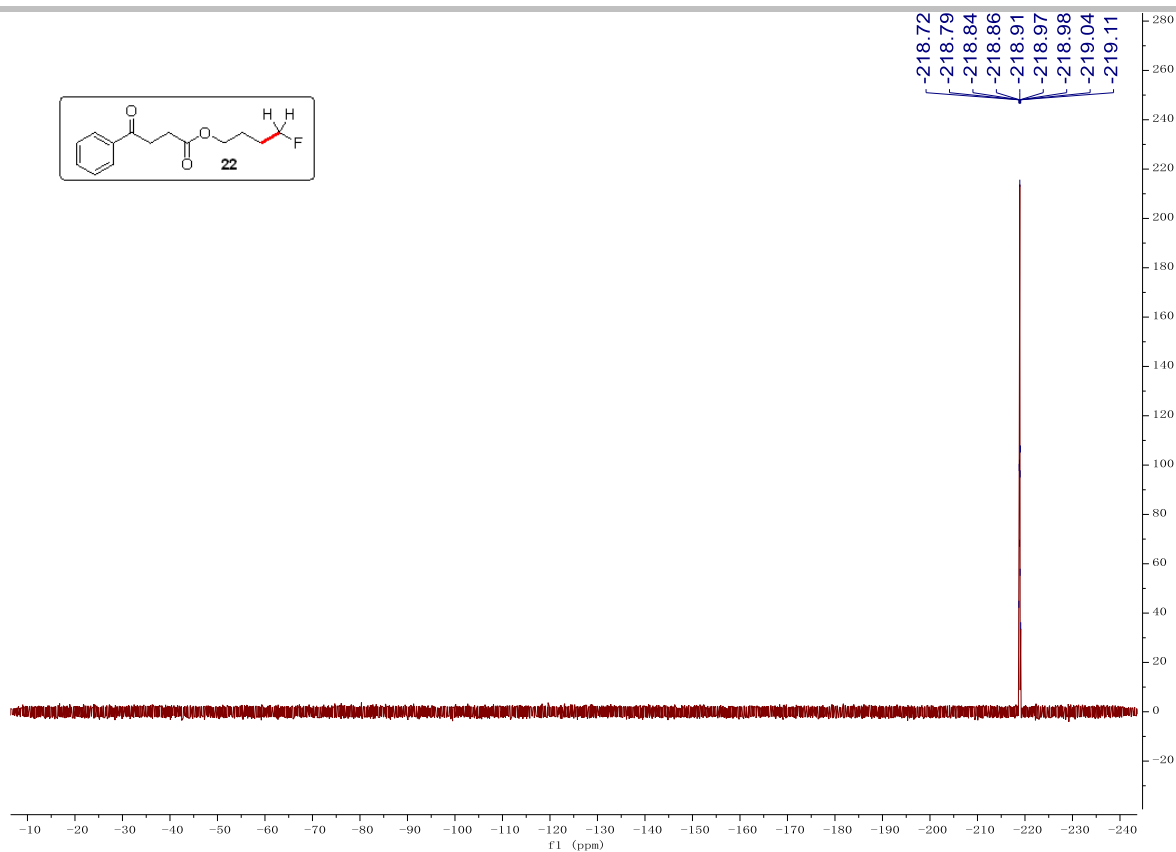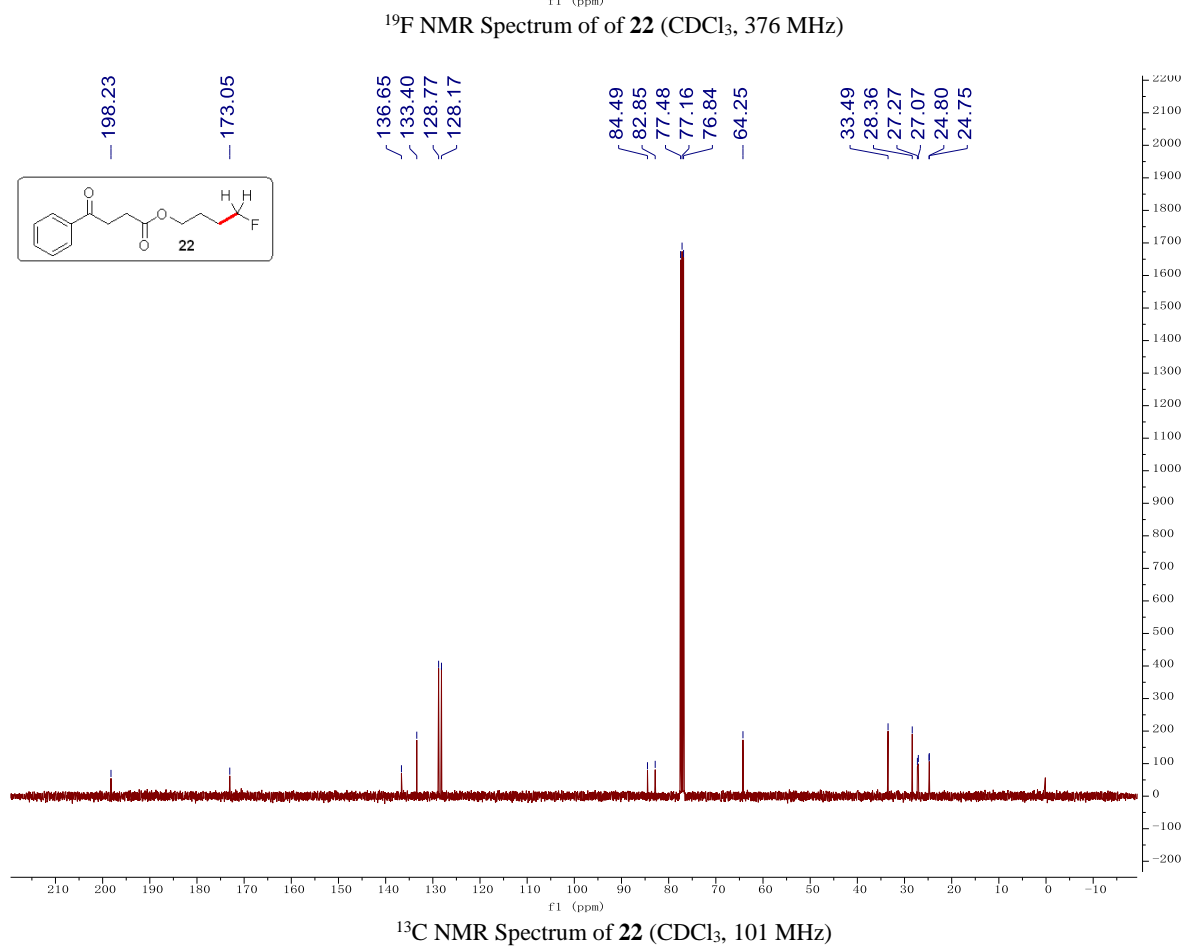

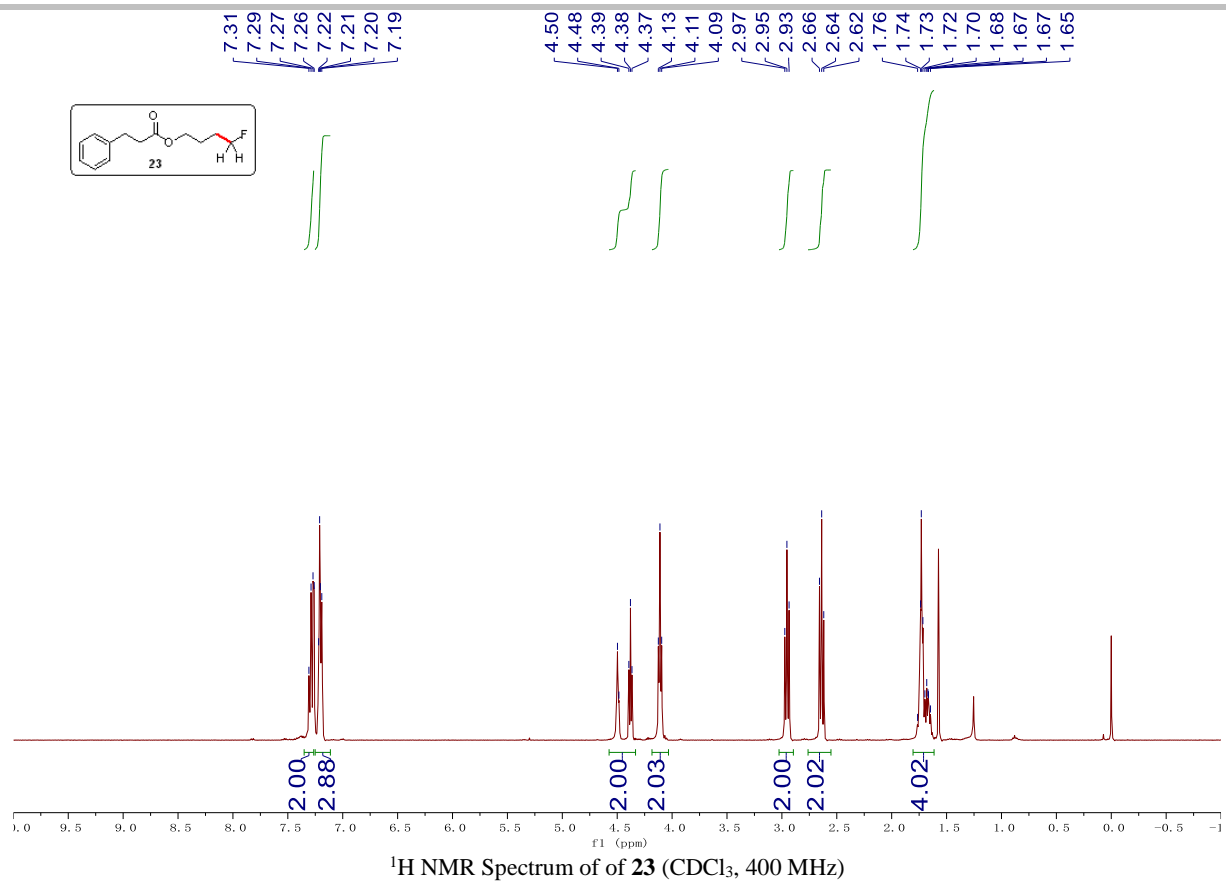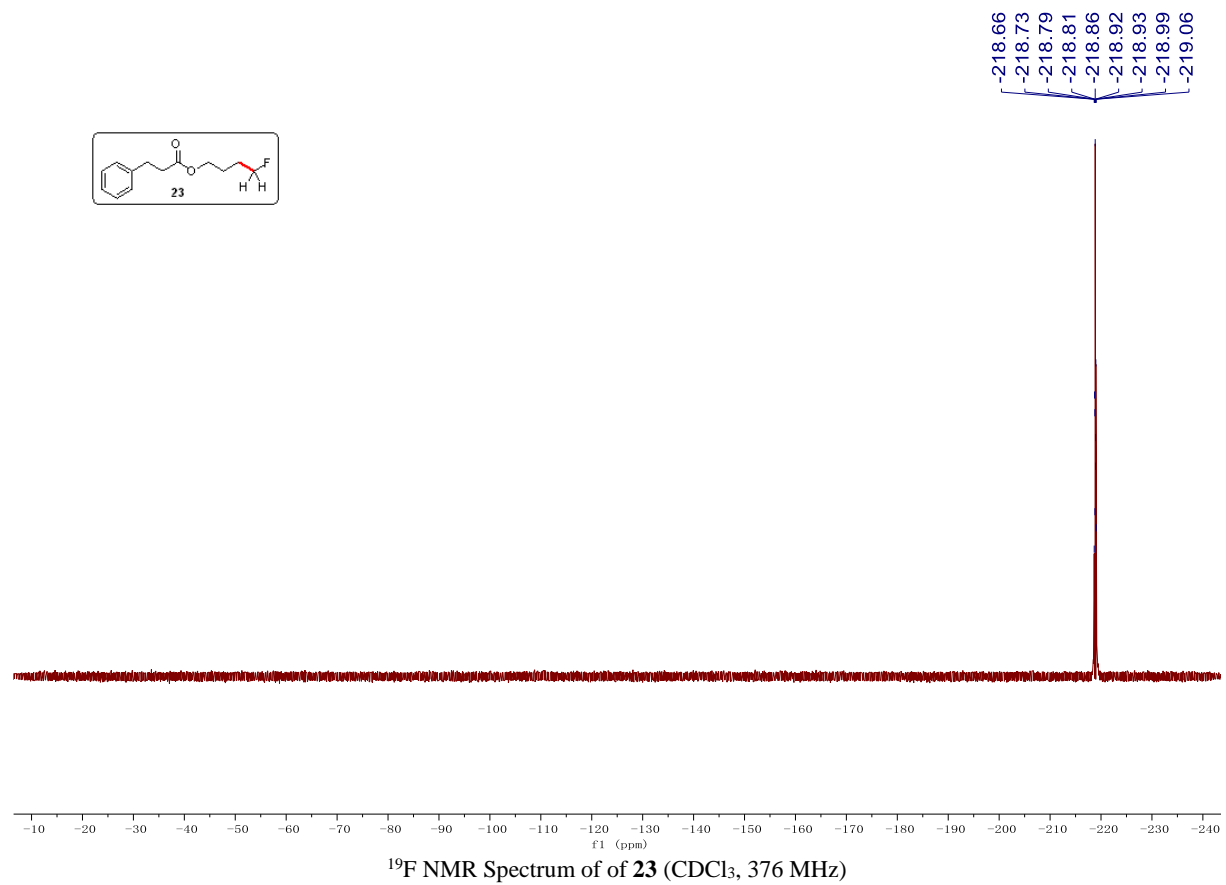

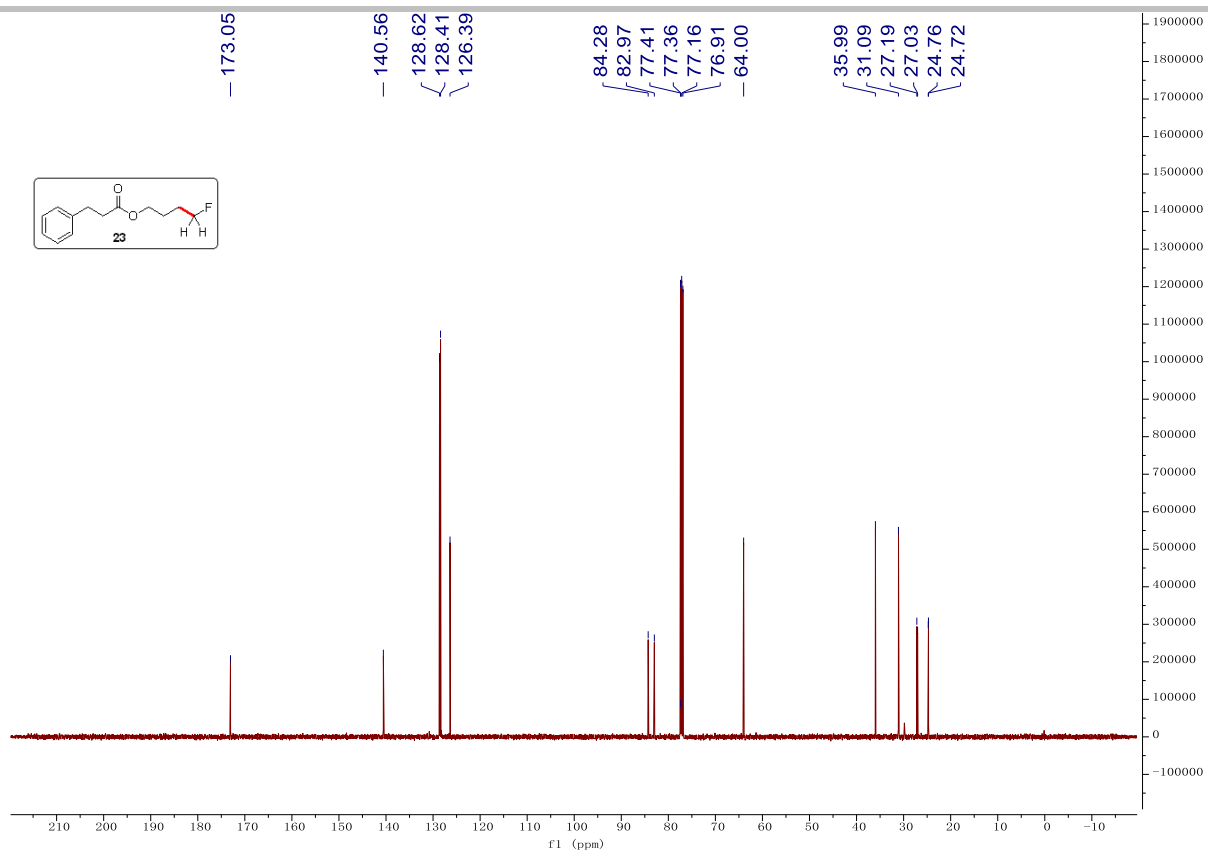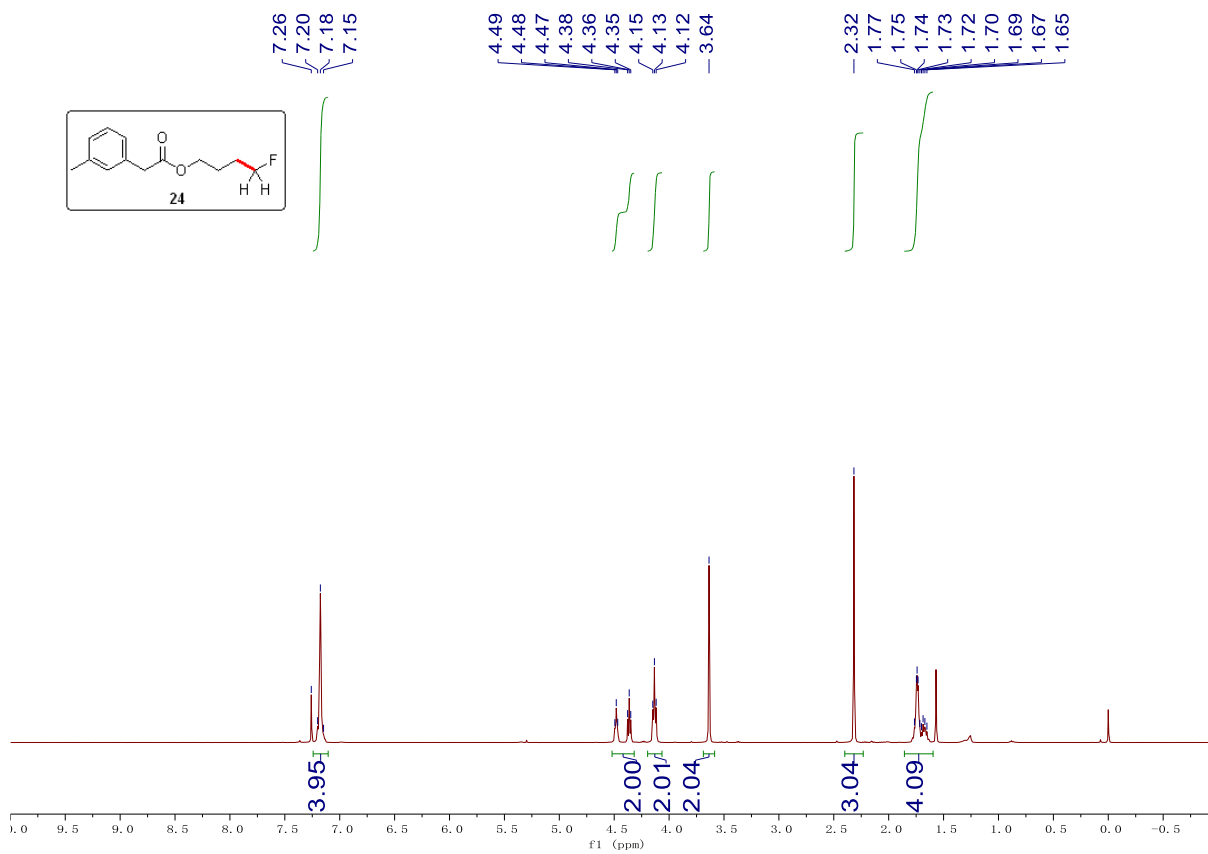

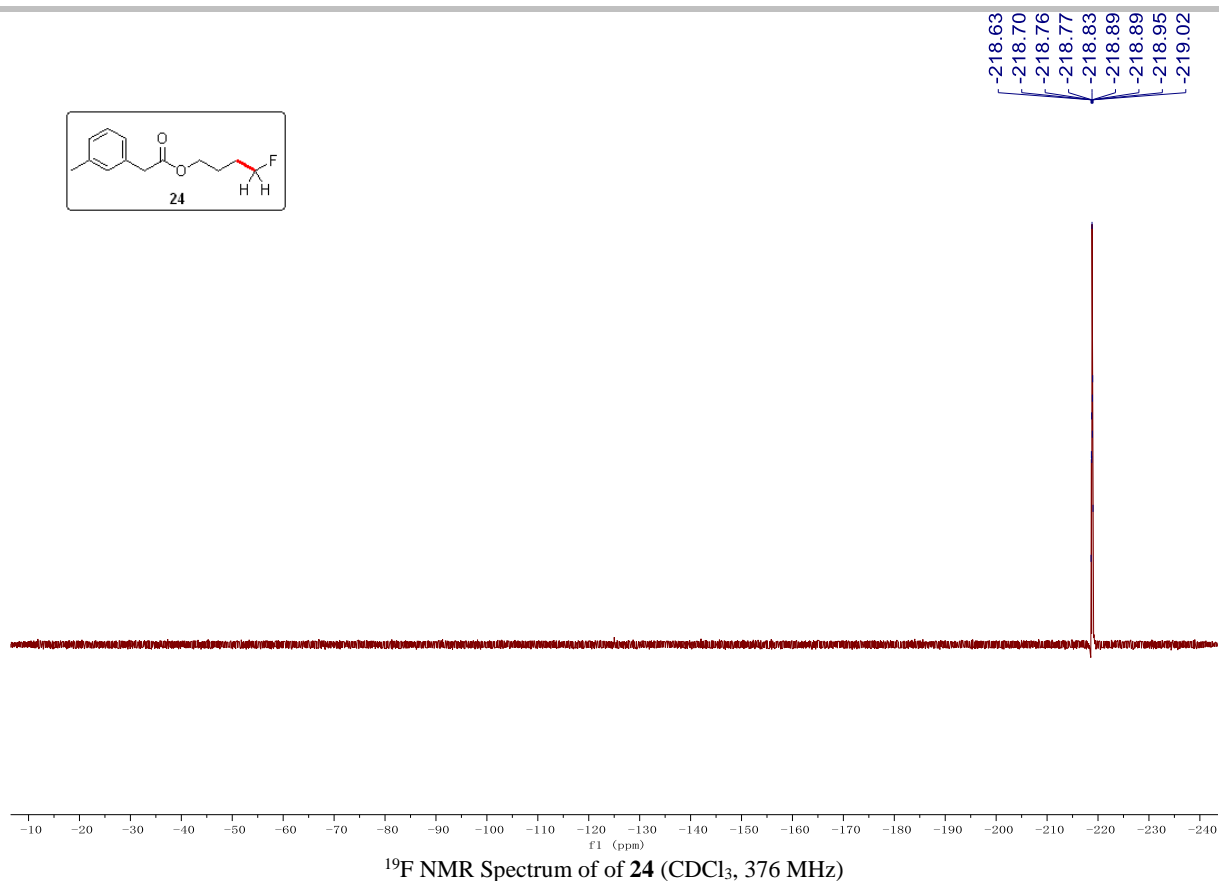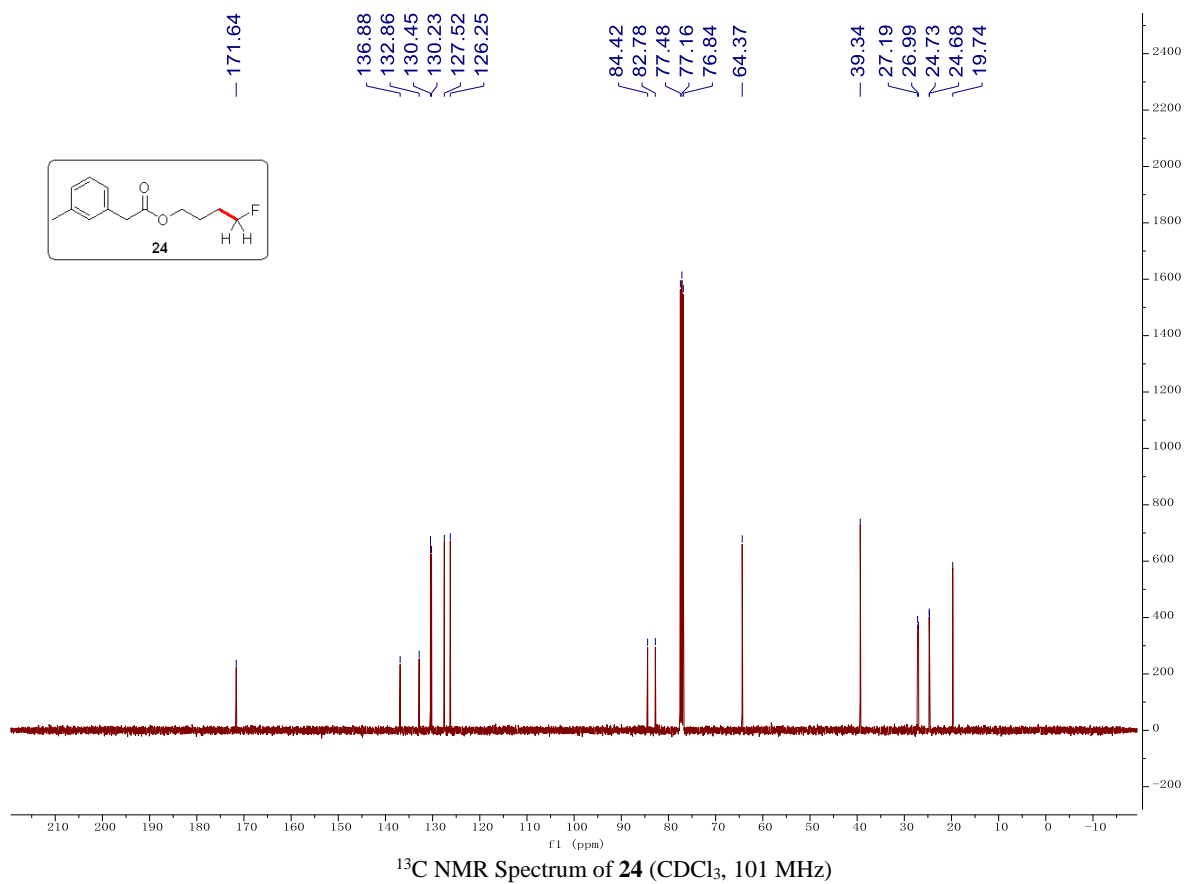



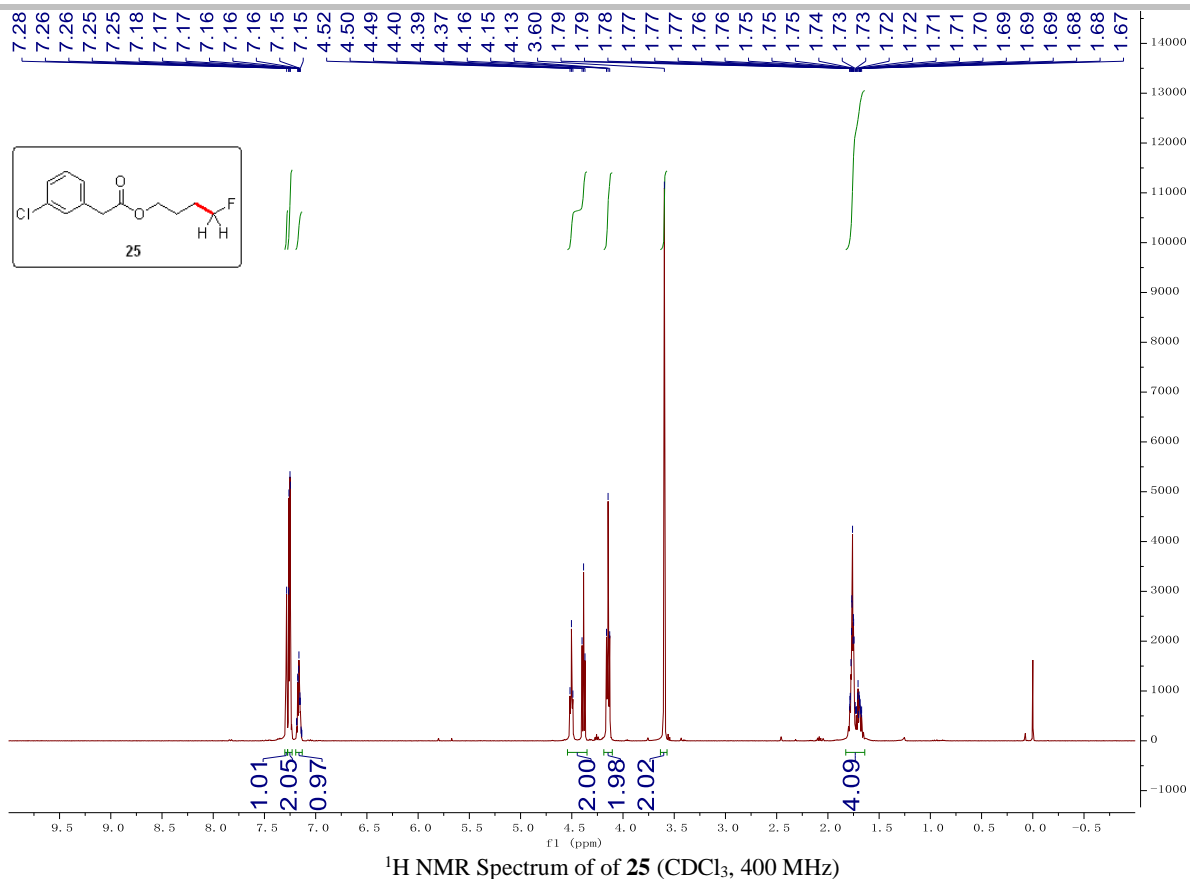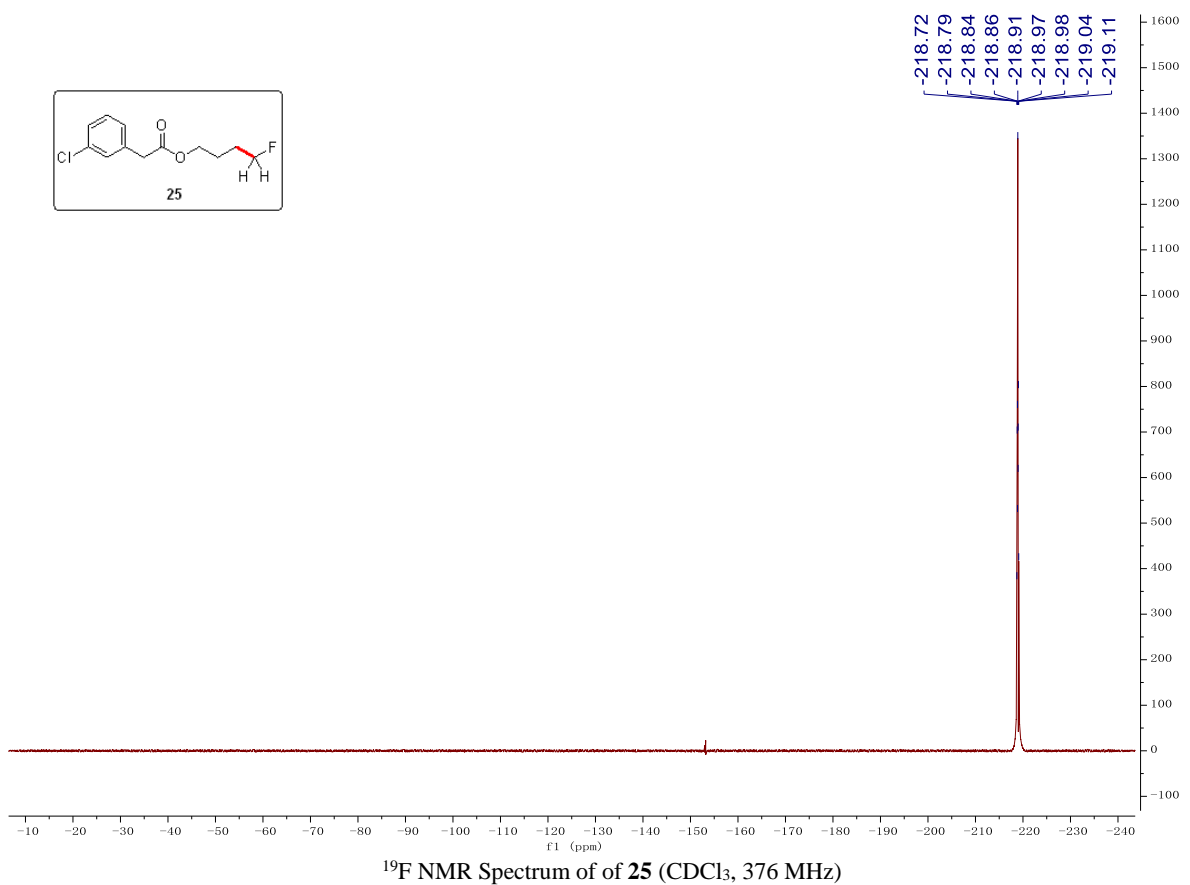

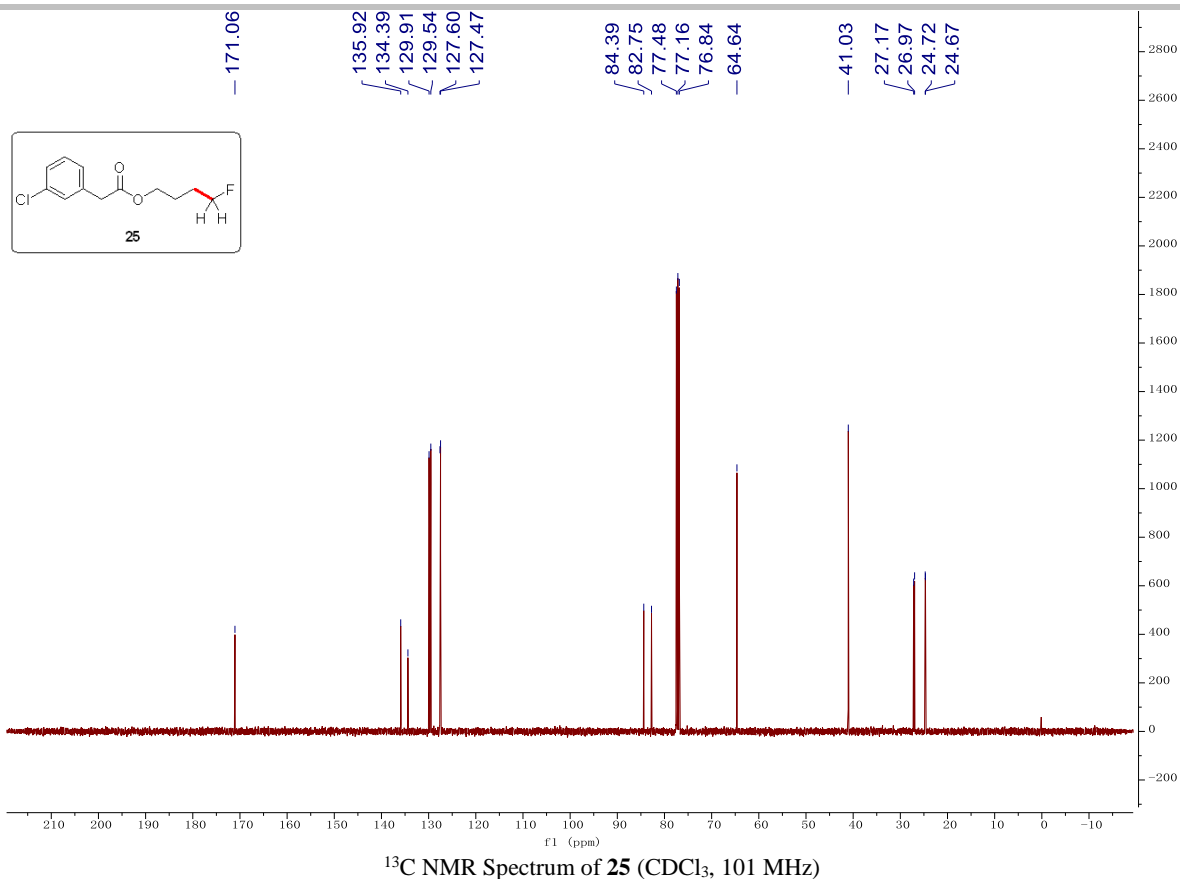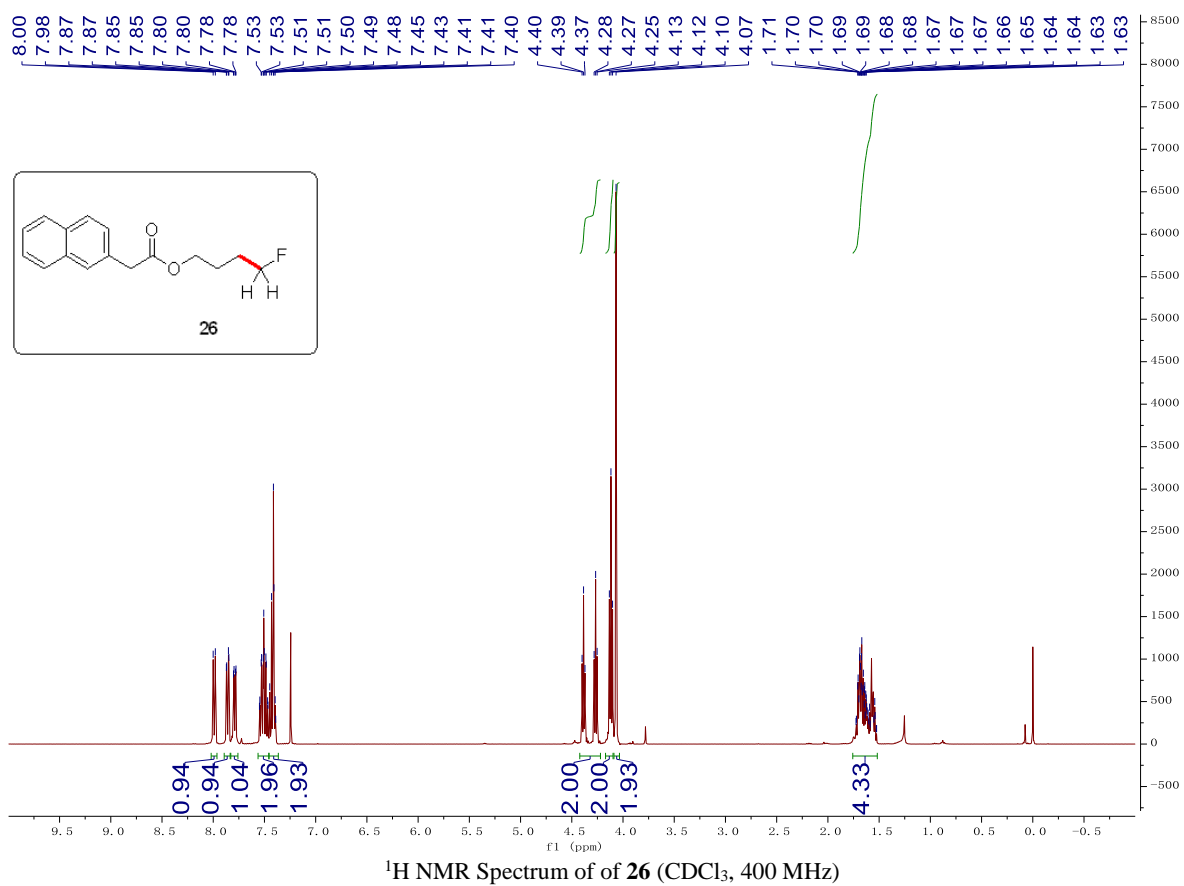

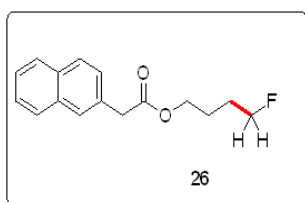

-218.68  
-218.75  
-218.81  
-218.82  
-218.88  
-218.94  
-218.95  
-219.00  
-219.07

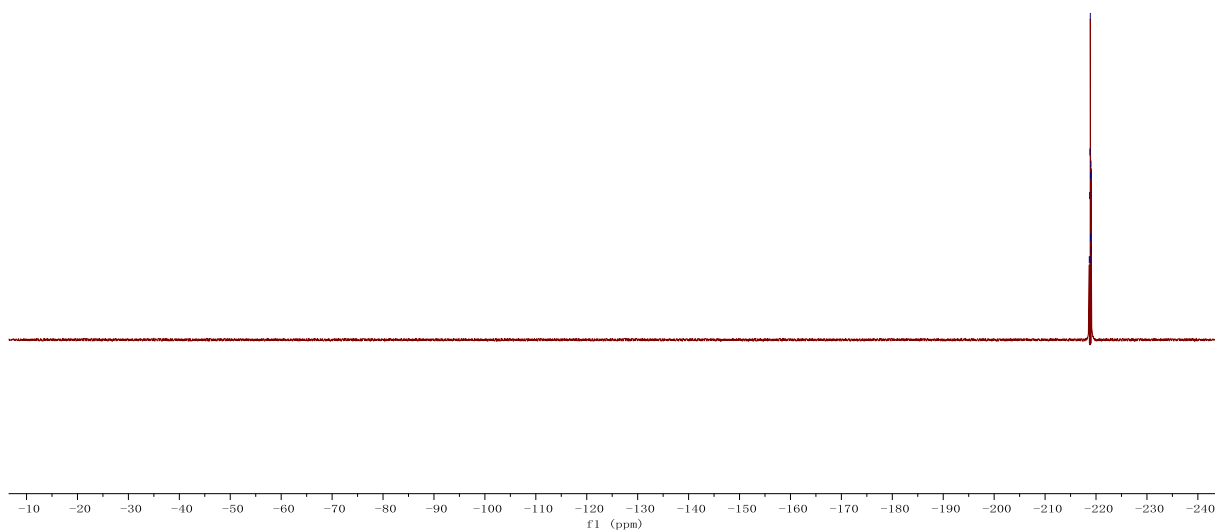

<sup>19</sup>F NMR Spectrum of **26** (CDCl<sub>3</sub>, 376 MHz)

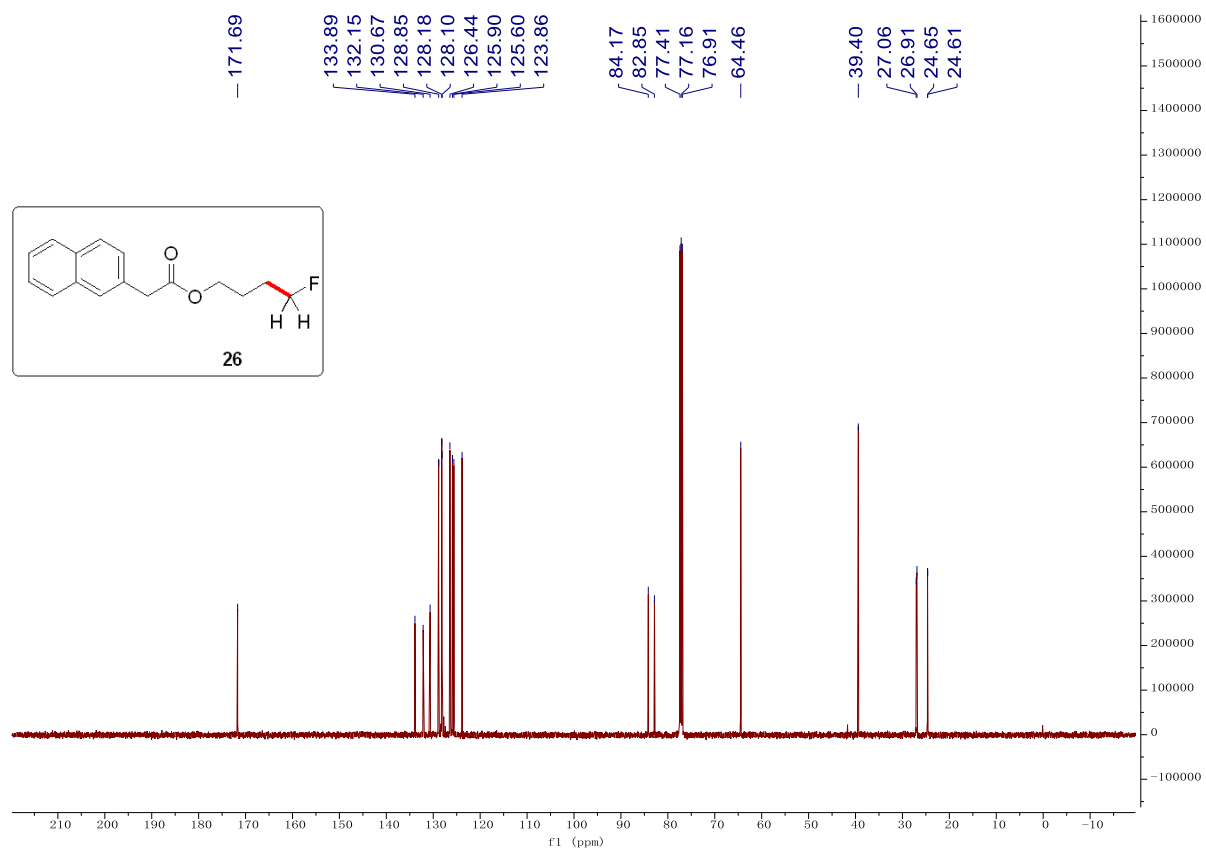

<sup>13</sup>C NMR Spectrum of **26** (CDCl<sub>3</sub>, 126 MHz)

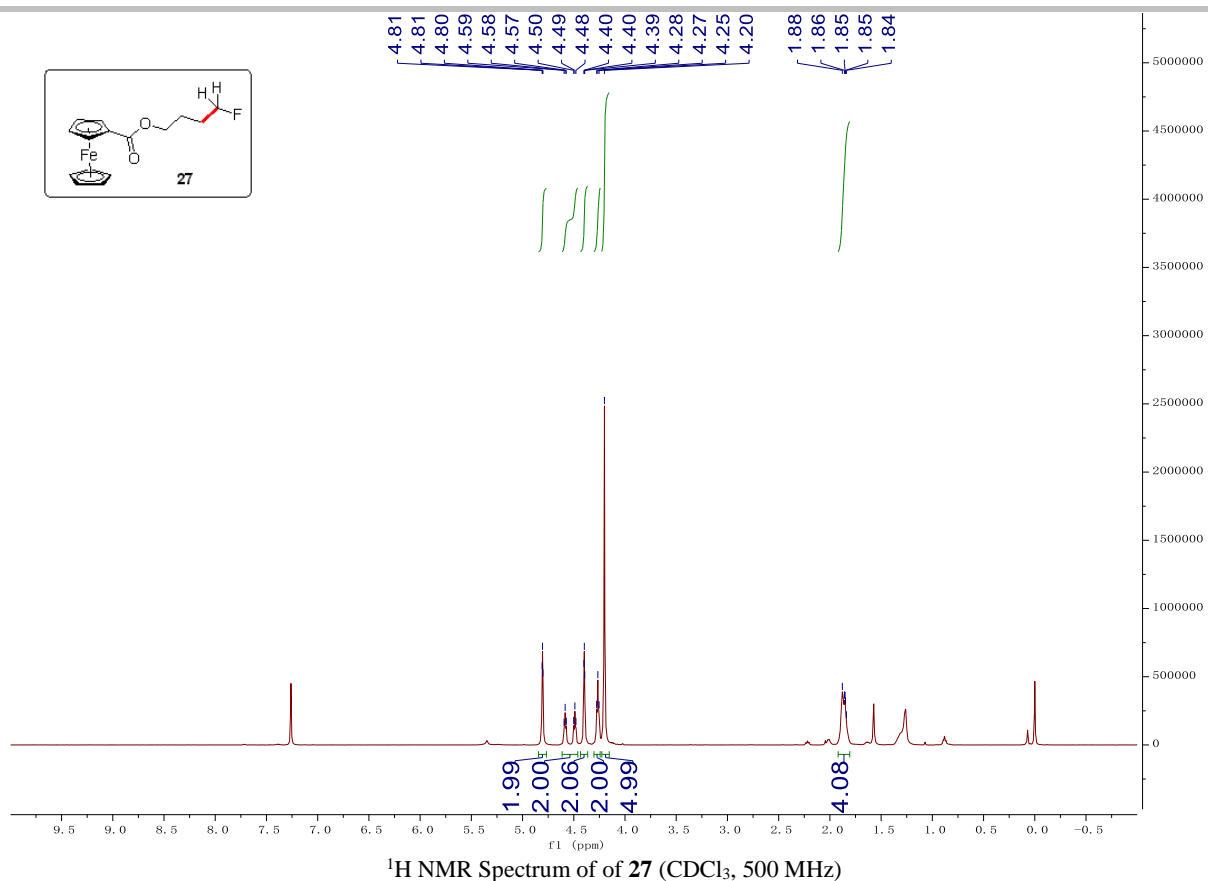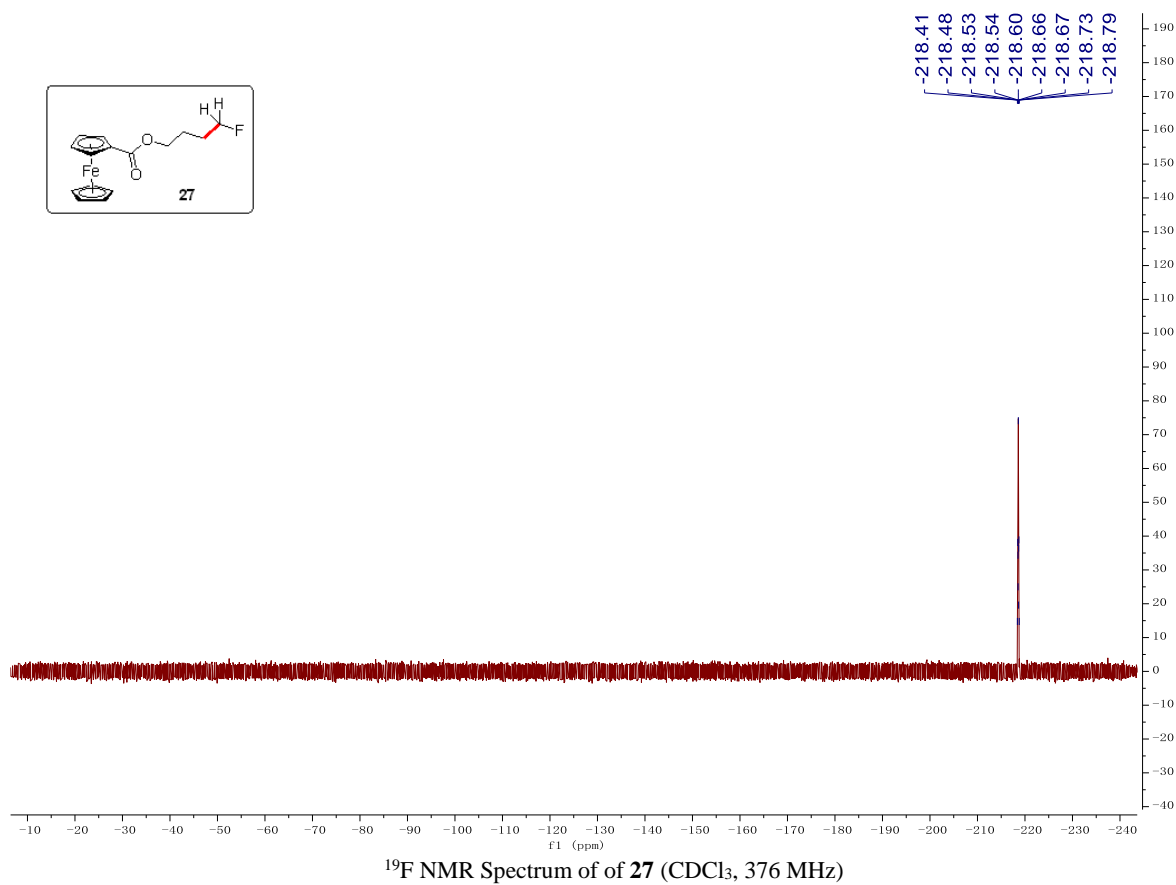

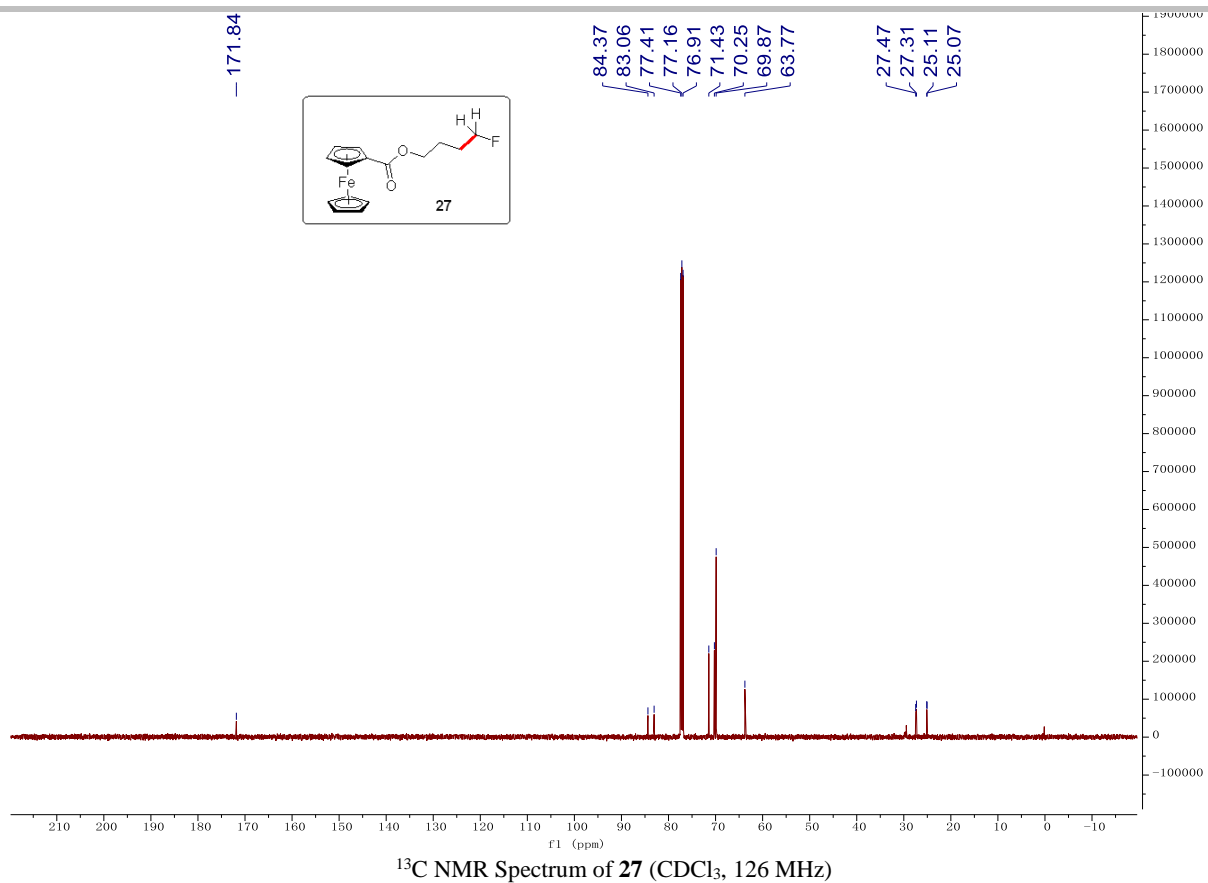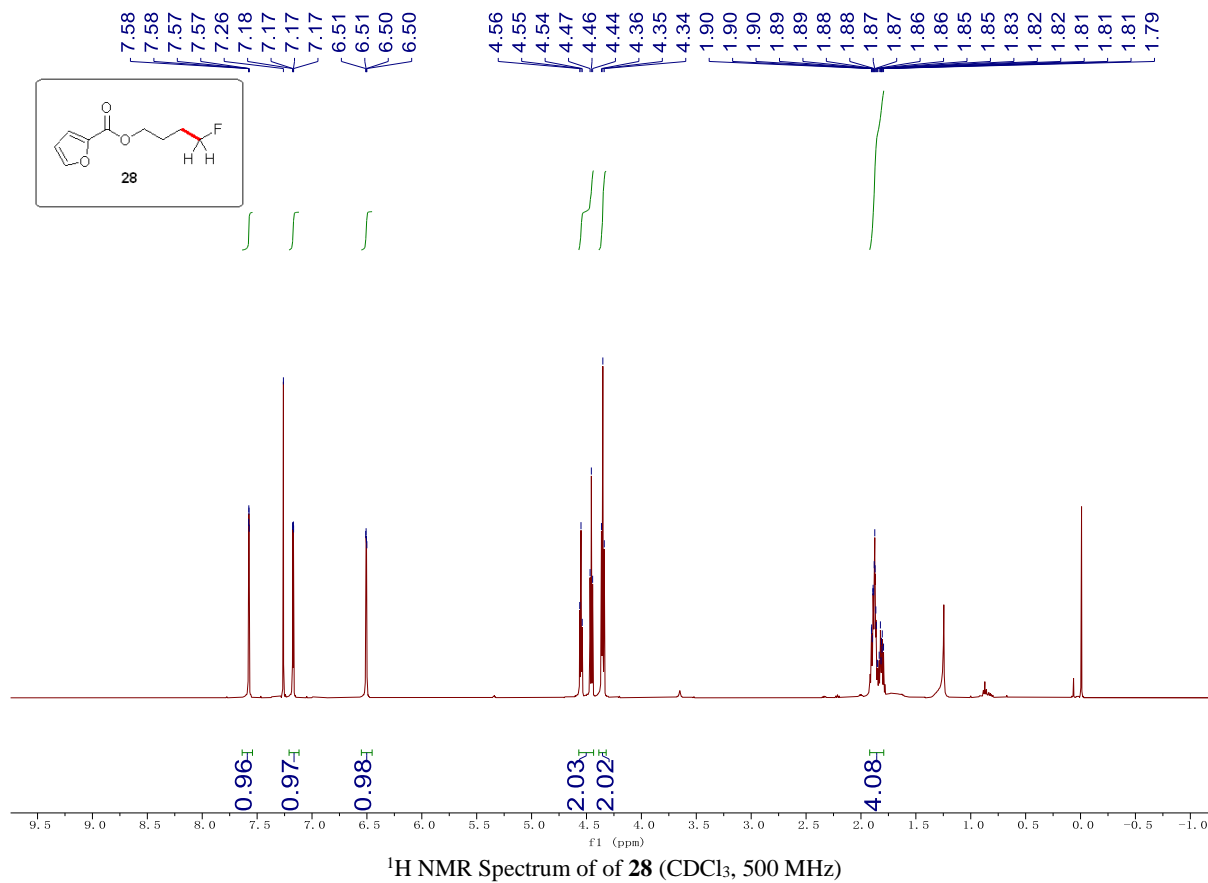

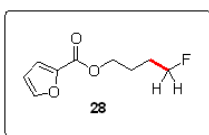

-218.69  
-218.75  
-218.81  
-218.82  
-218.88  
-218.94  
-218.95  
-219.00  
-219.07

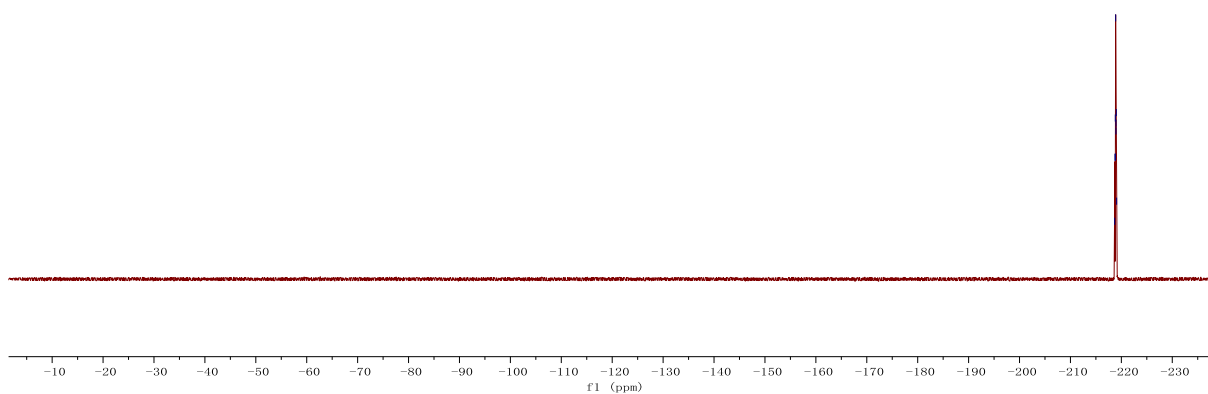

<sup>19</sup>F NMR Spectrum of of **28** (CDCl<sub>3</sub>, 376 MHz)

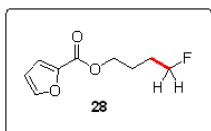

-158.86  
146.46  
144.79  
-118.03  
-111.97  
84.26  
82.95  
77.42  
77.16  
76.91  
64.47  
27.27  
27.11  
24.91  
24.87

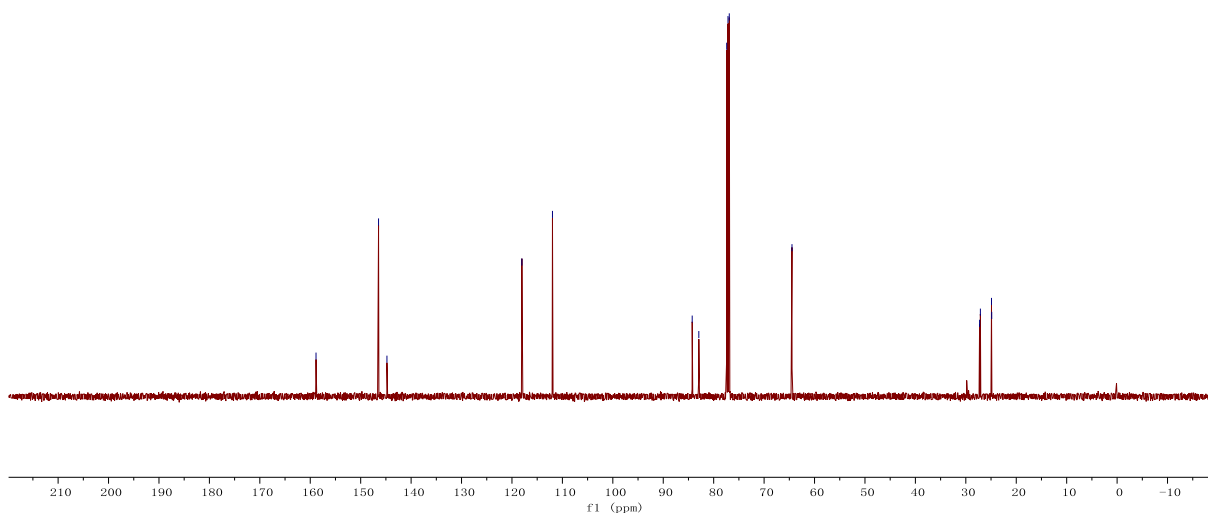

<sup>13</sup>C NMR Spectrum of **28** (CDCl<sub>3</sub>, 126 MHz)

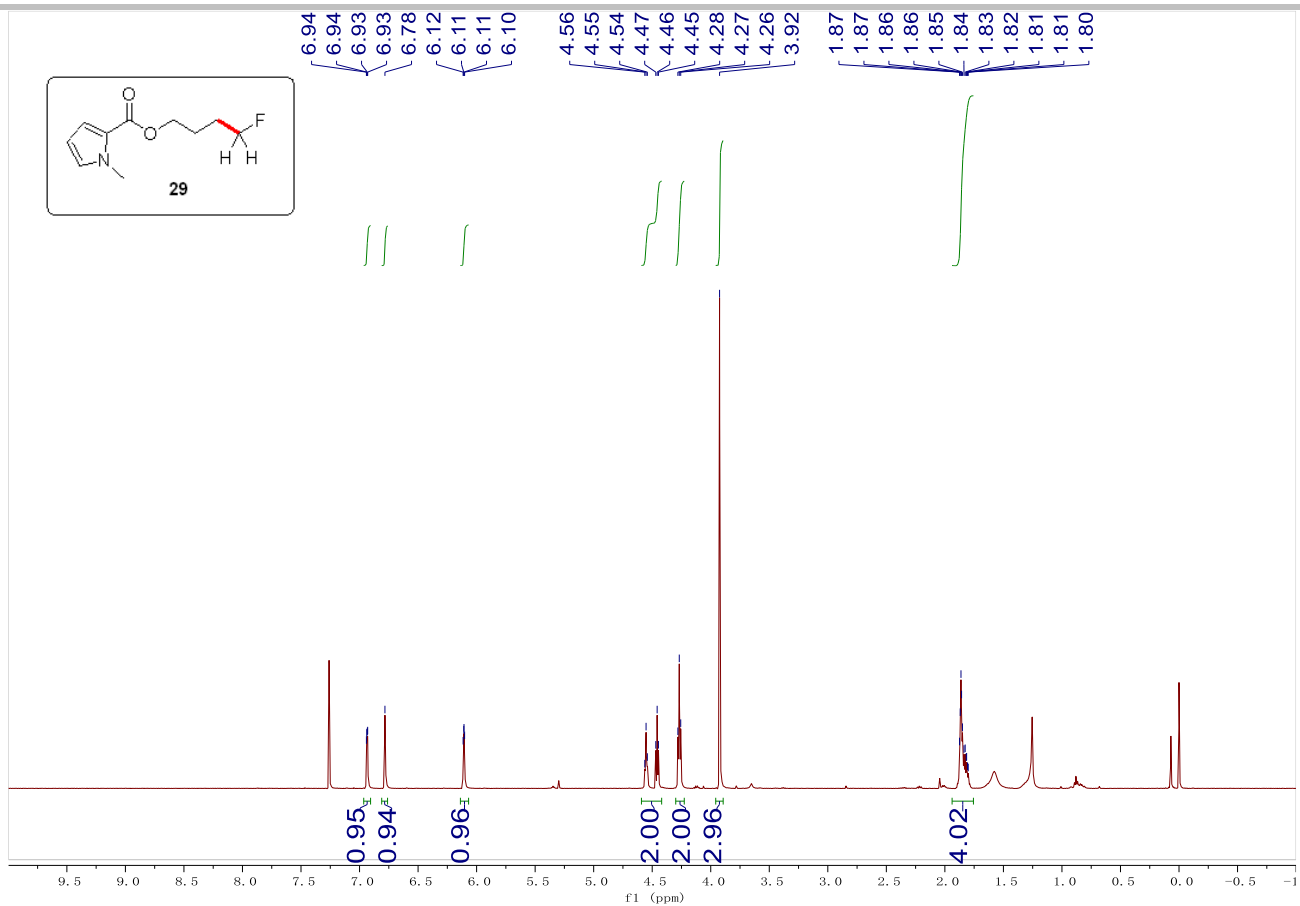

<sup>1</sup>H NMR Spectrum of of **29** (CDCl<sub>3</sub>, 500 MHz)

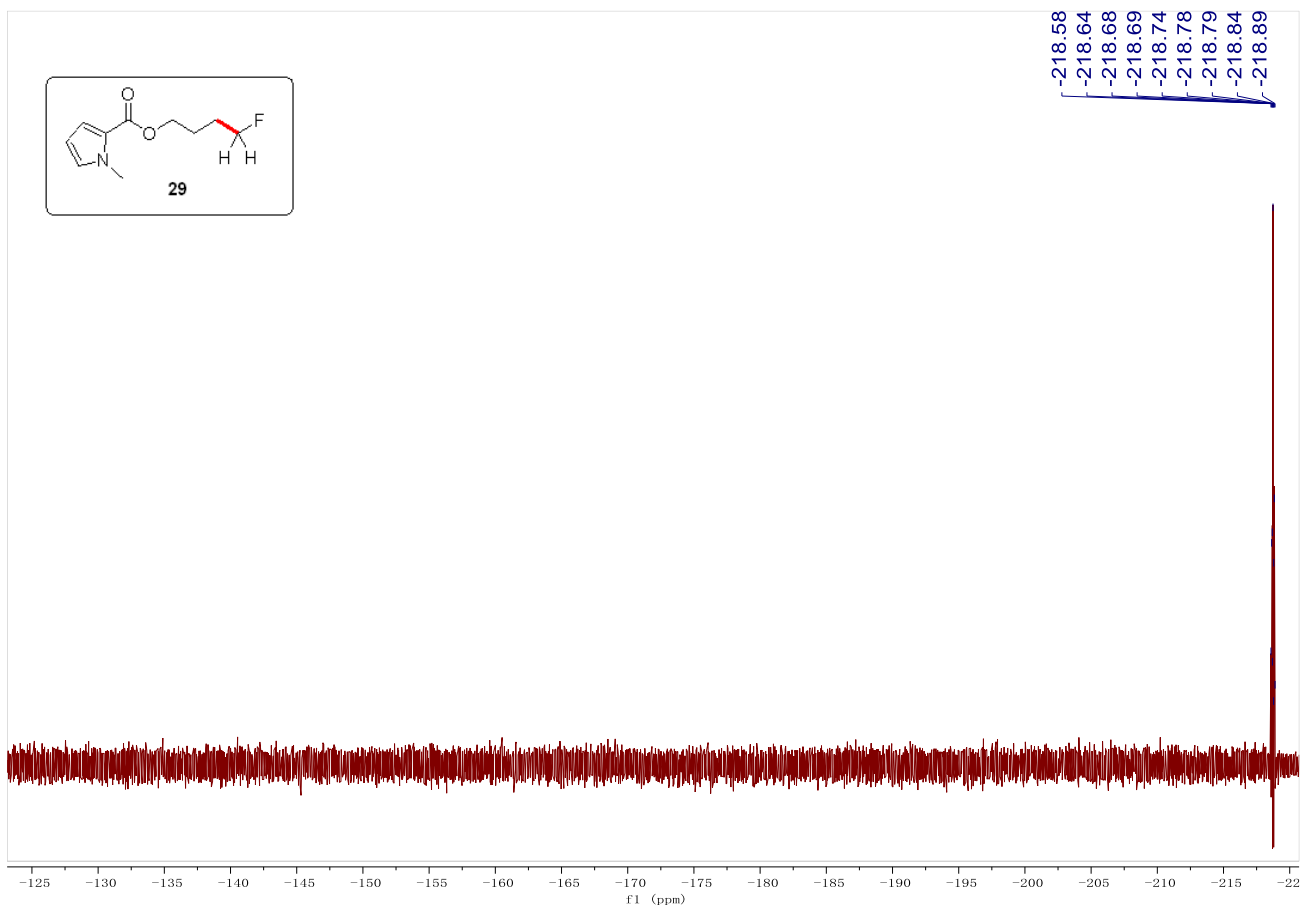

<sup>19</sup>F NMR Spectrum of of **29** (CDCl<sub>3</sub>, 376 MHz)

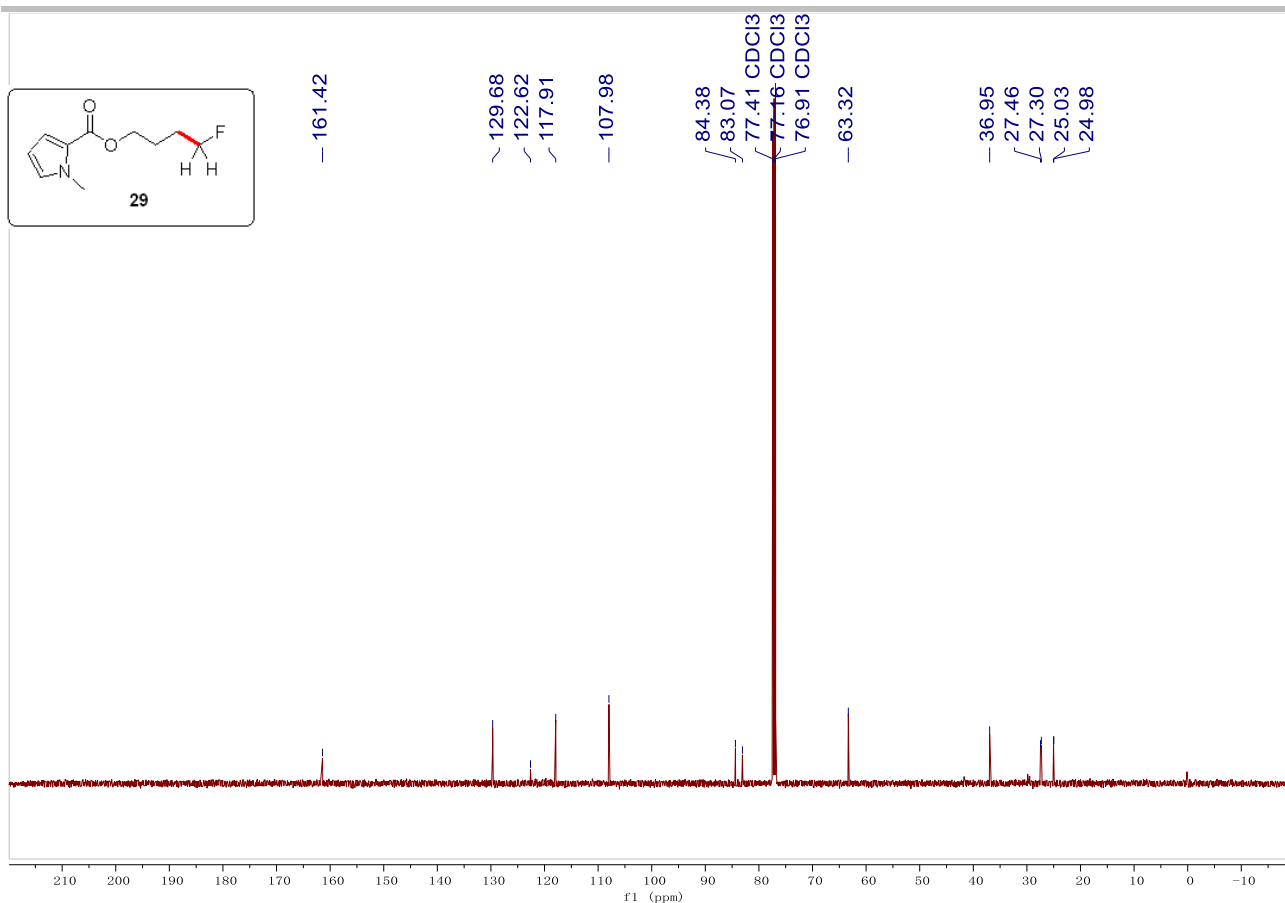

<sup>13</sup>C NMR Spectrum of **29** (CDCl<sub>3</sub>, 126 MHz)

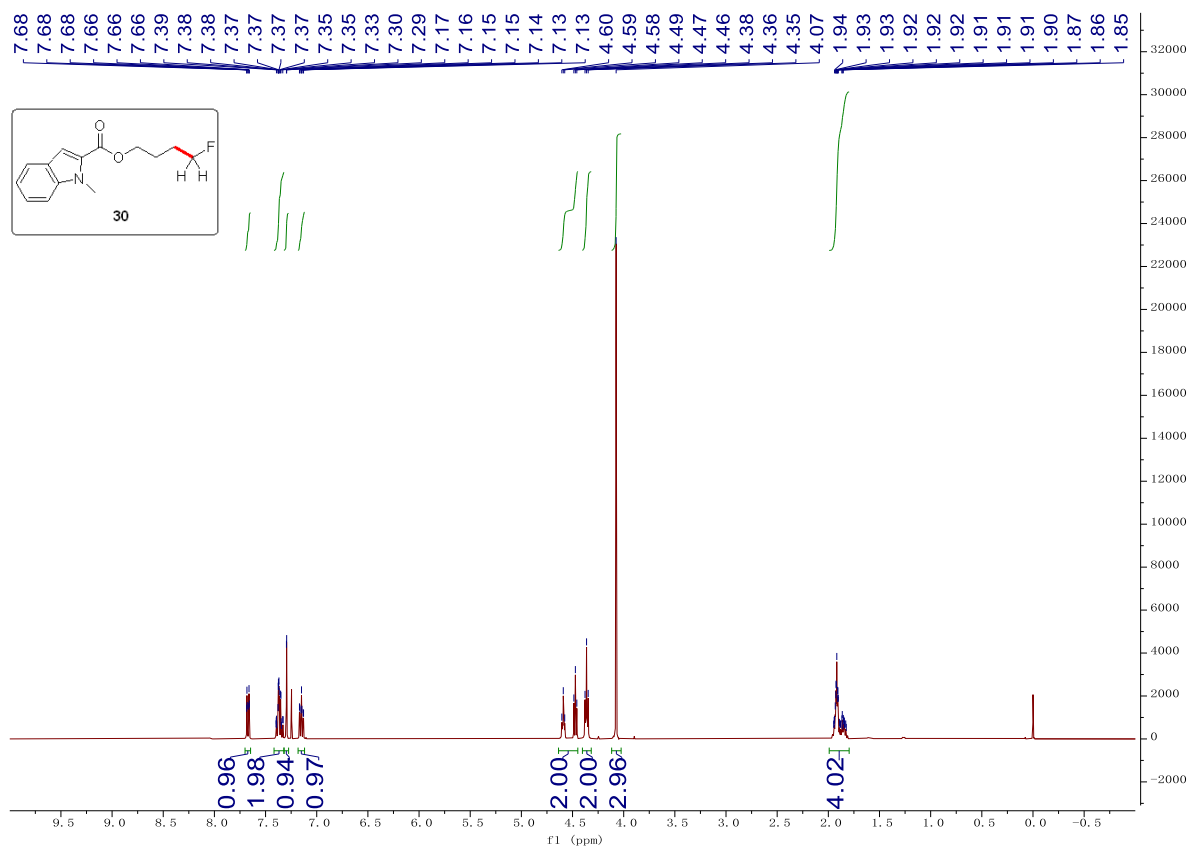

<sup>1</sup>H NMR Spectrum of **30** (CDCl<sub>3</sub>, 400 MHz)



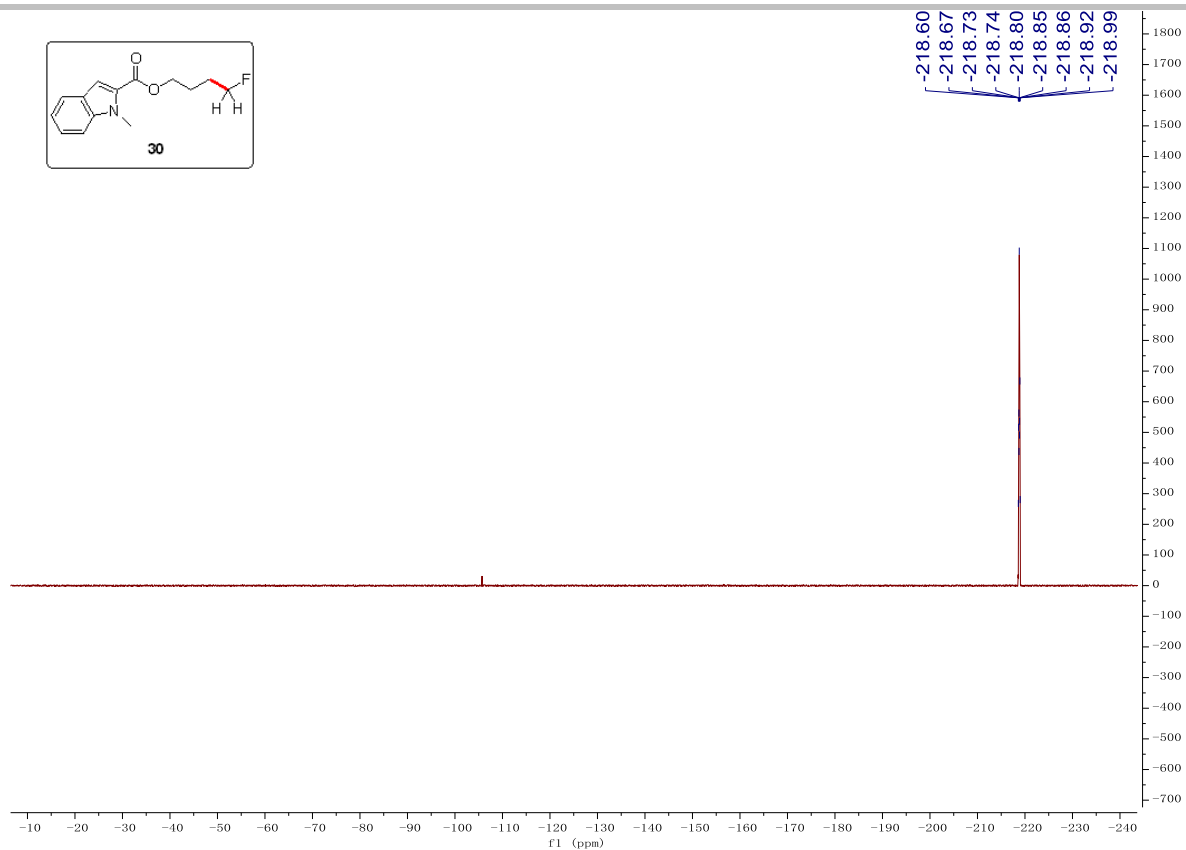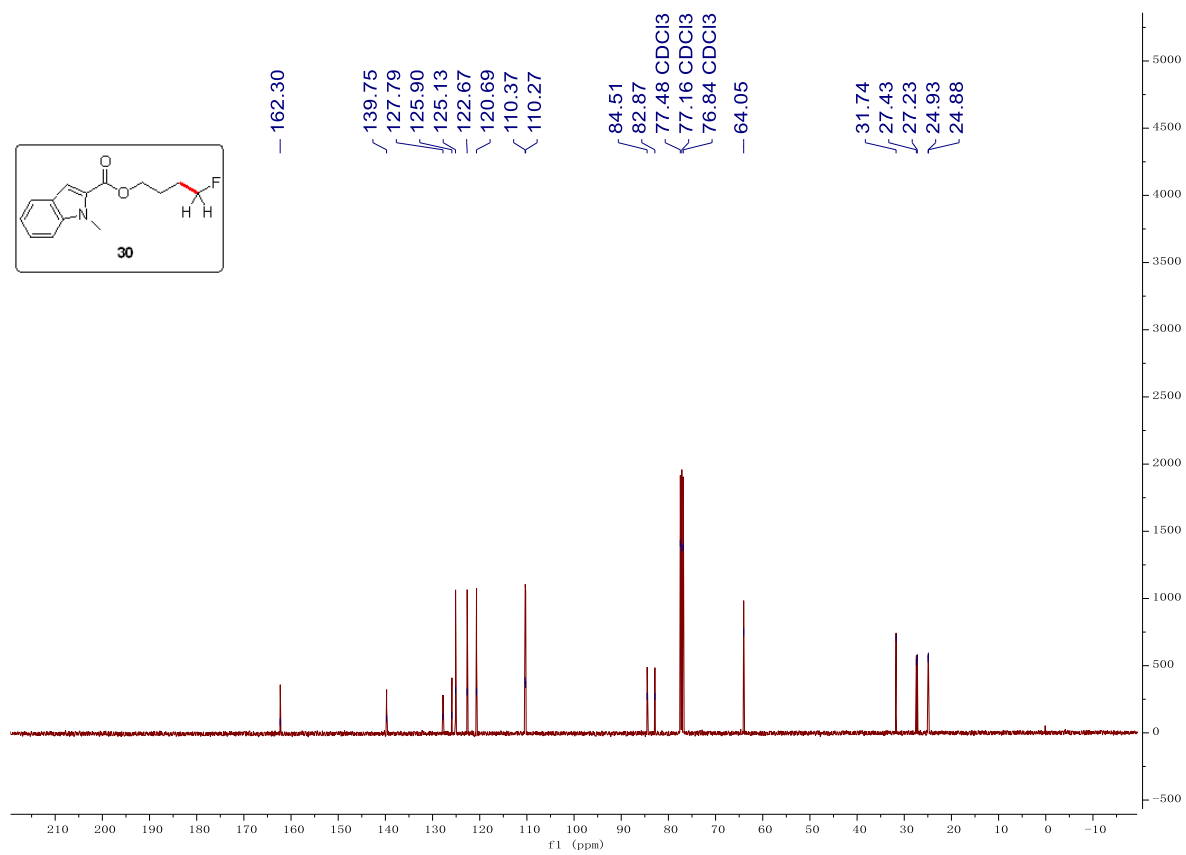

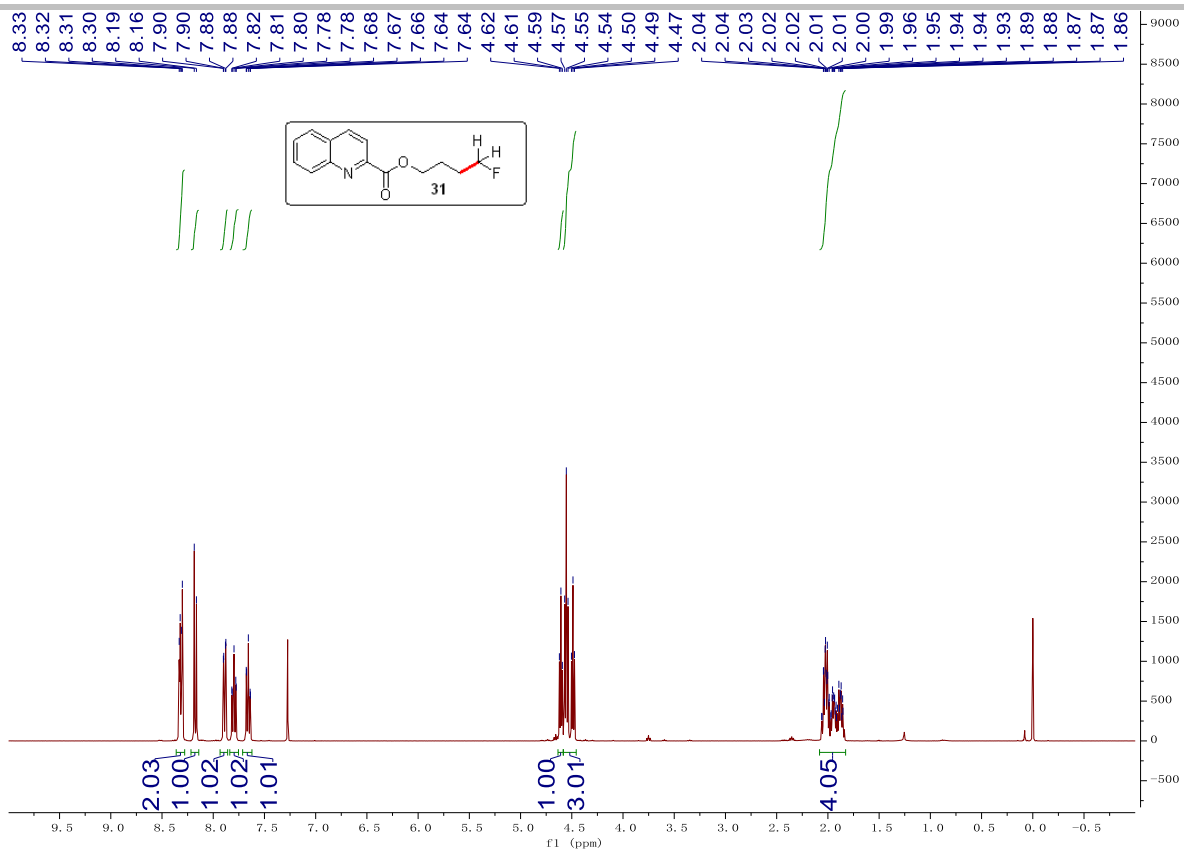

<sup>1</sup>H NMR Spectrum of of 31 (CDCl<sub>3</sub>, 400 MHz)

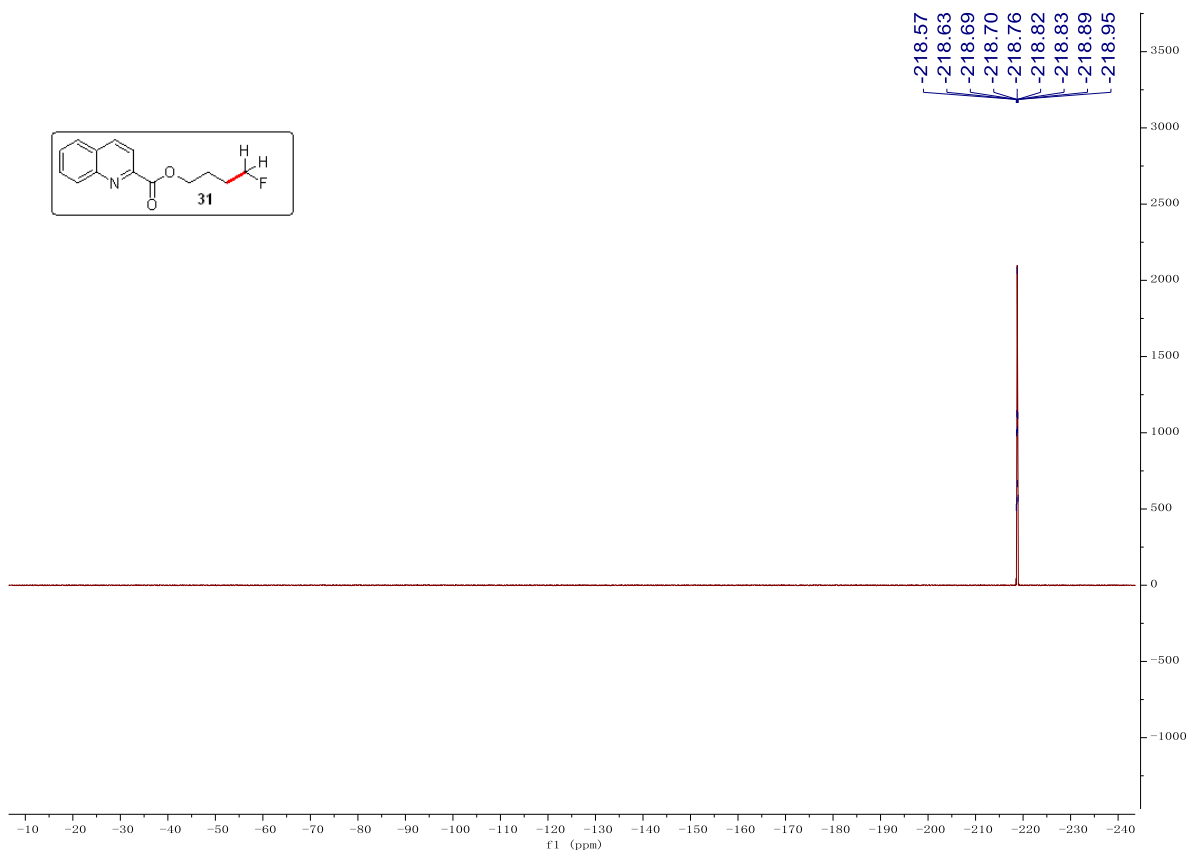

<sup>19</sup>F NMR Spectrum of of 31 (CDCl<sub>3</sub>, 376 MHz)

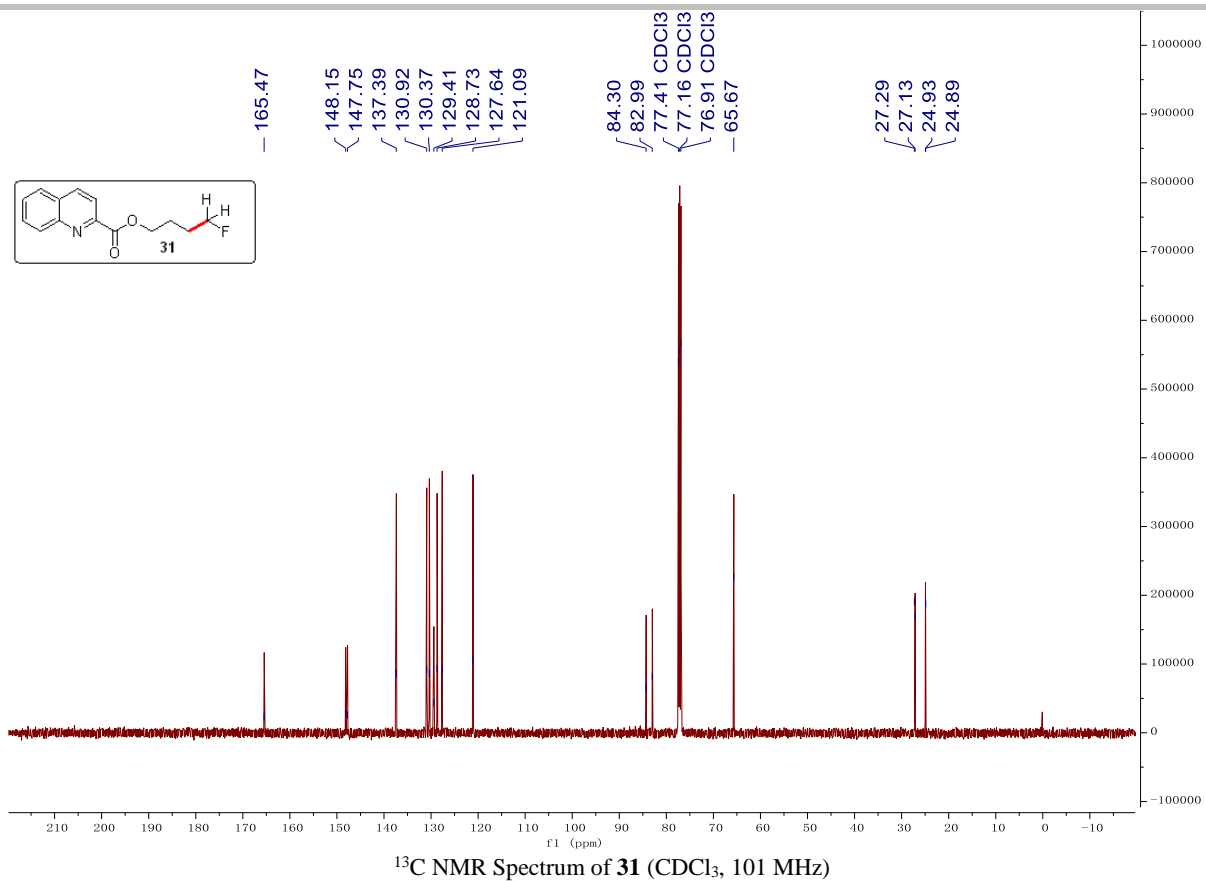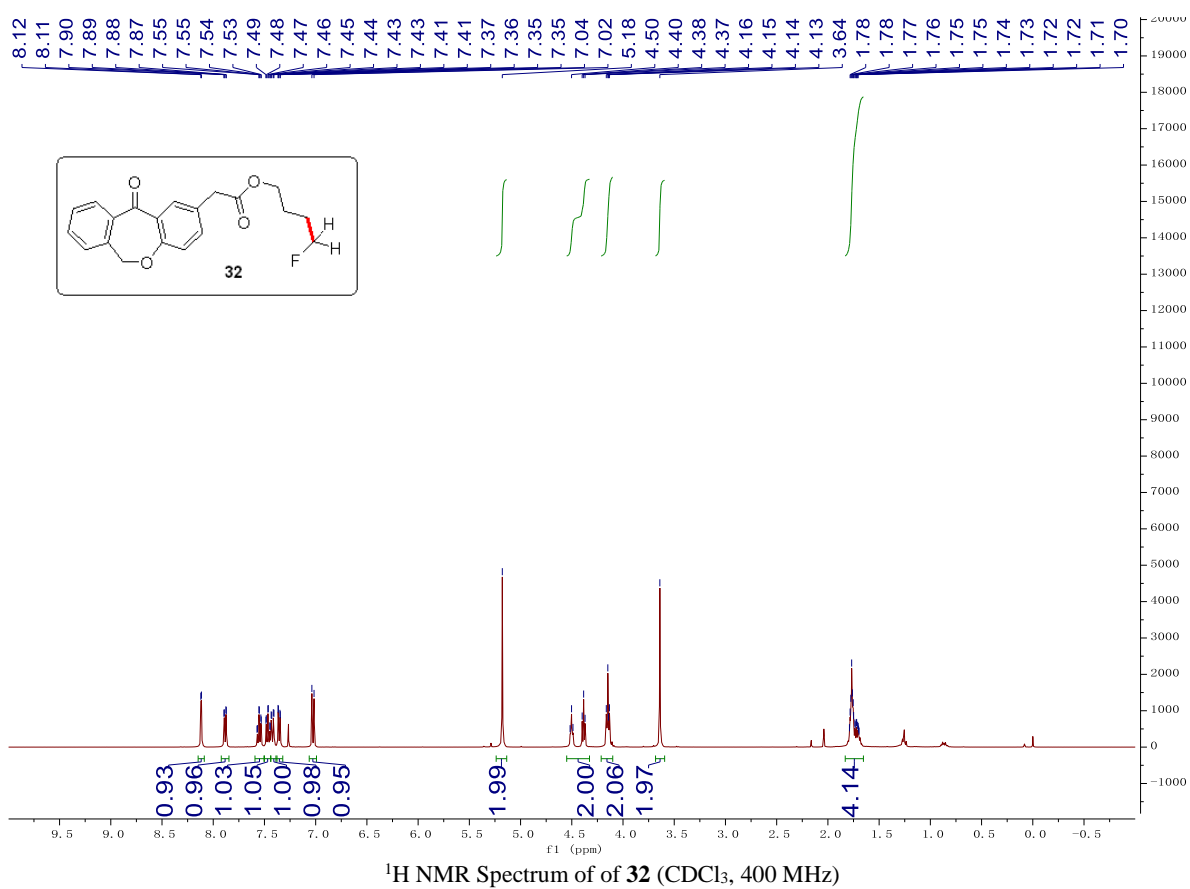

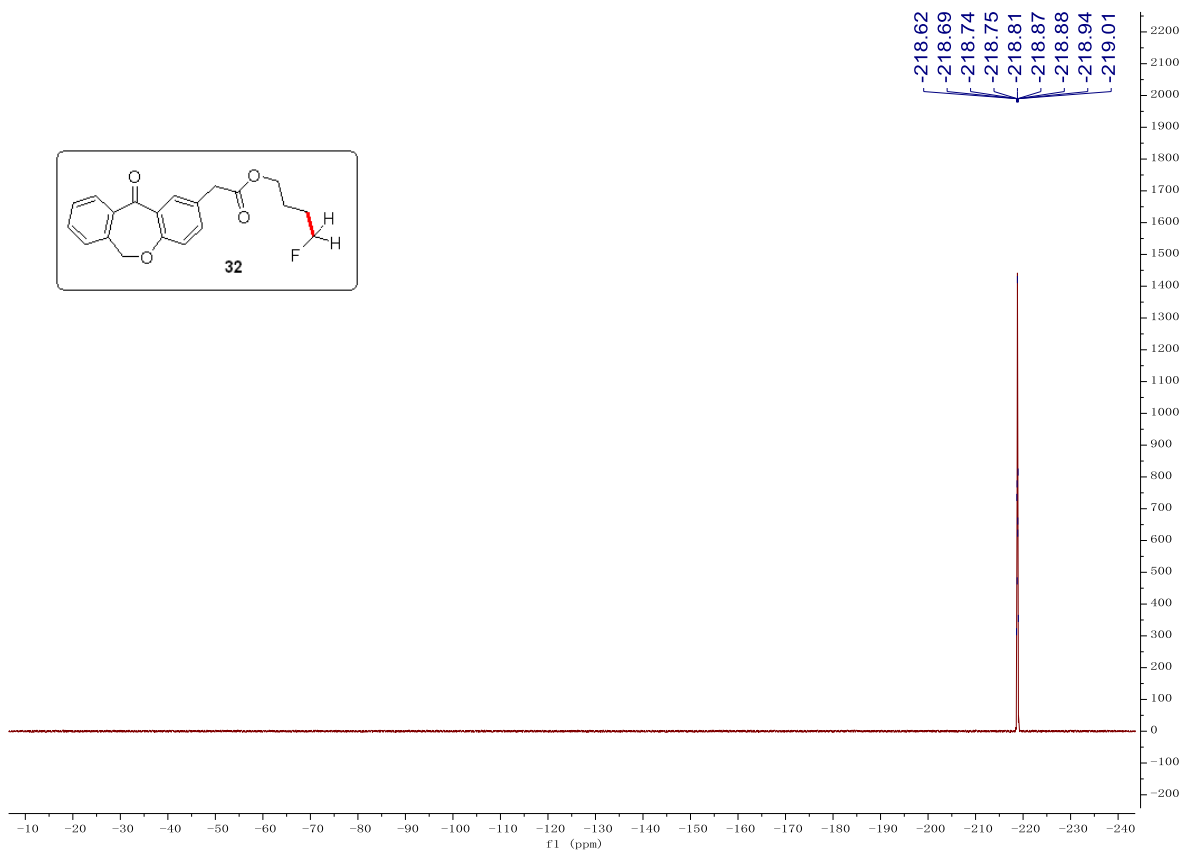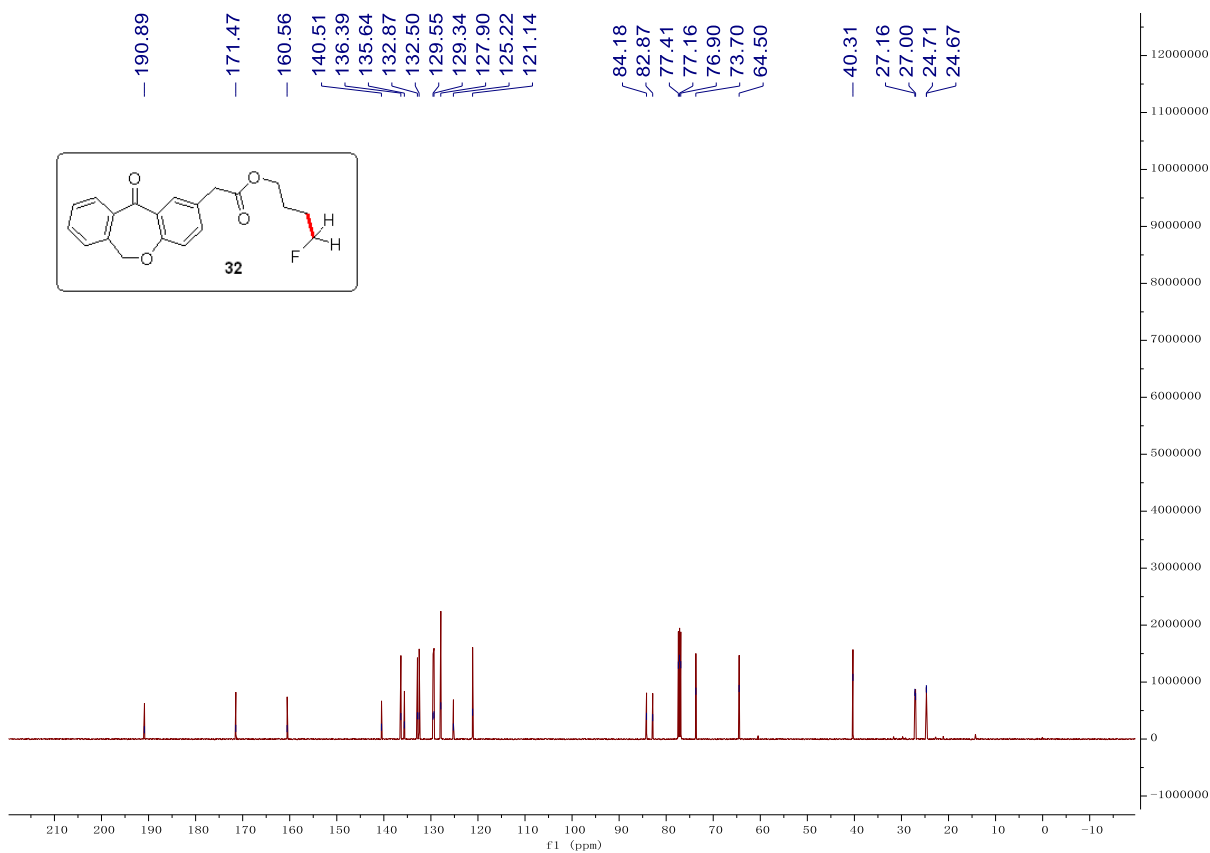

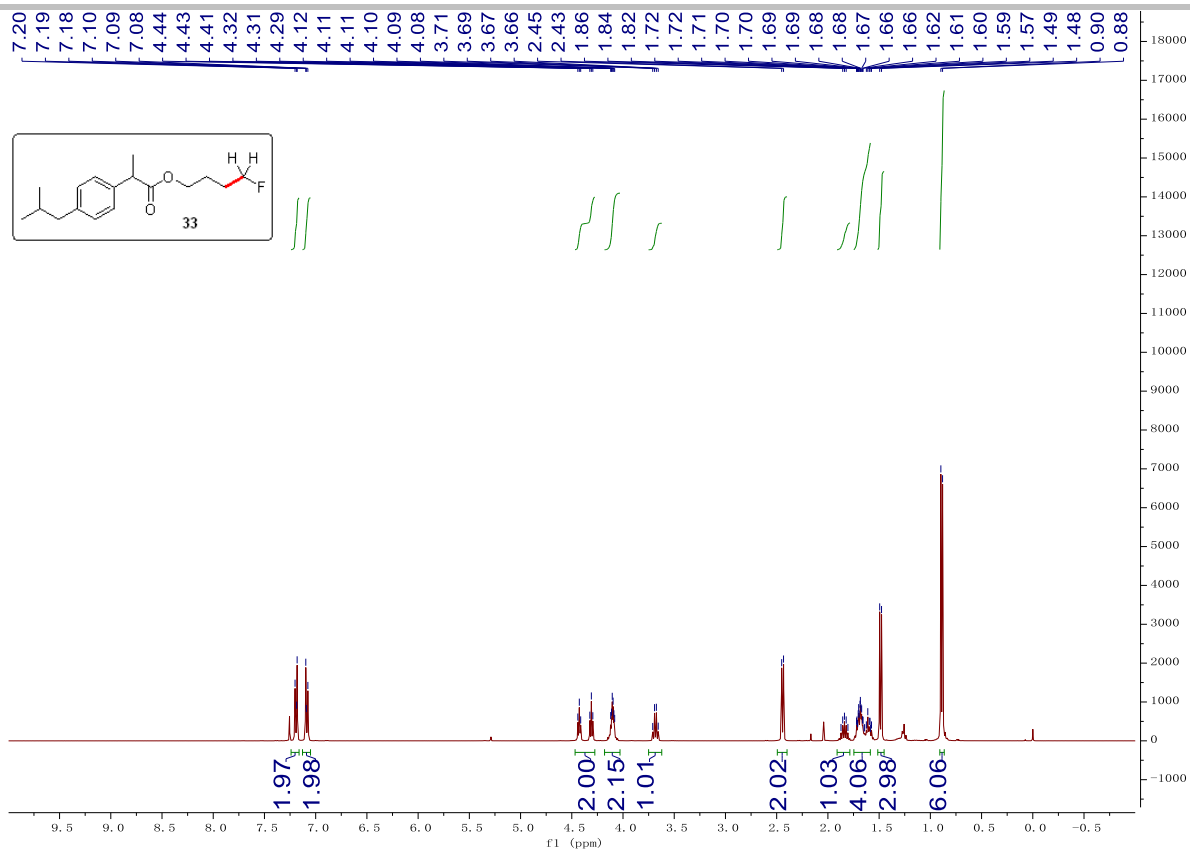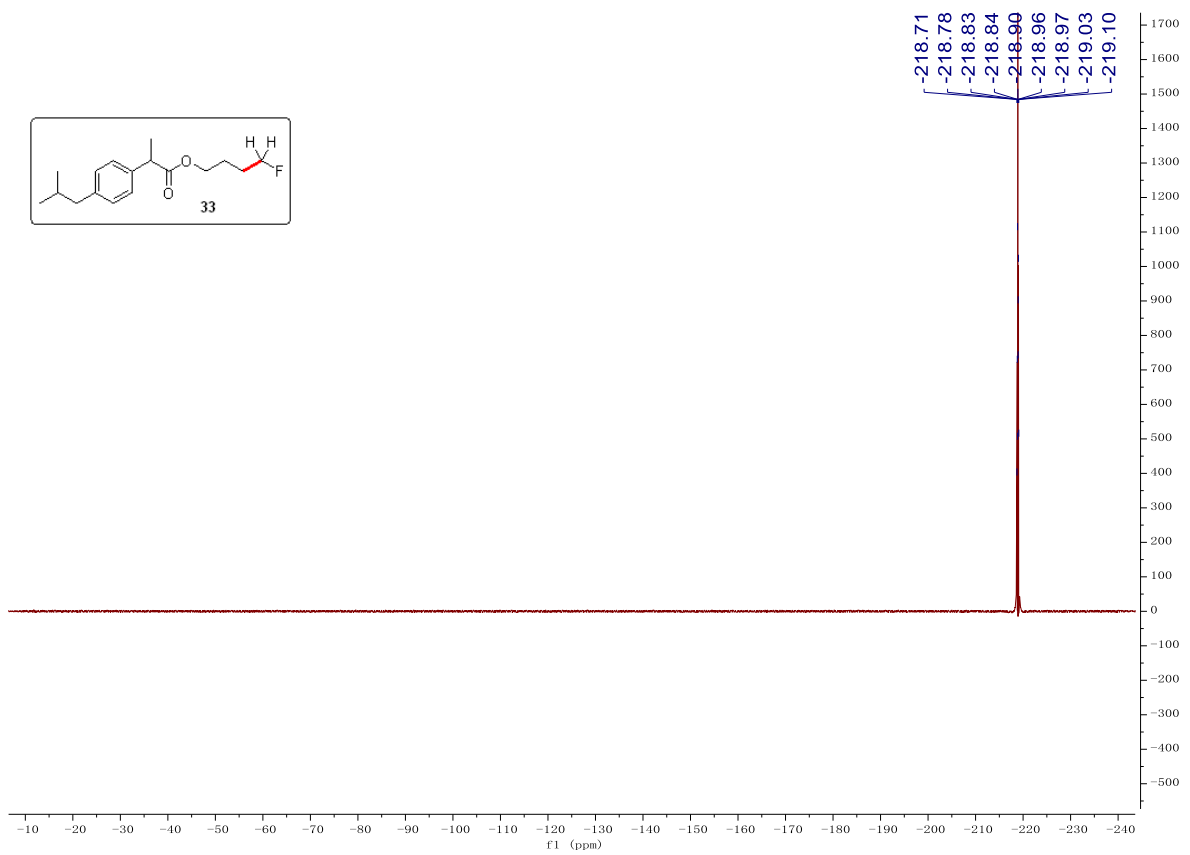

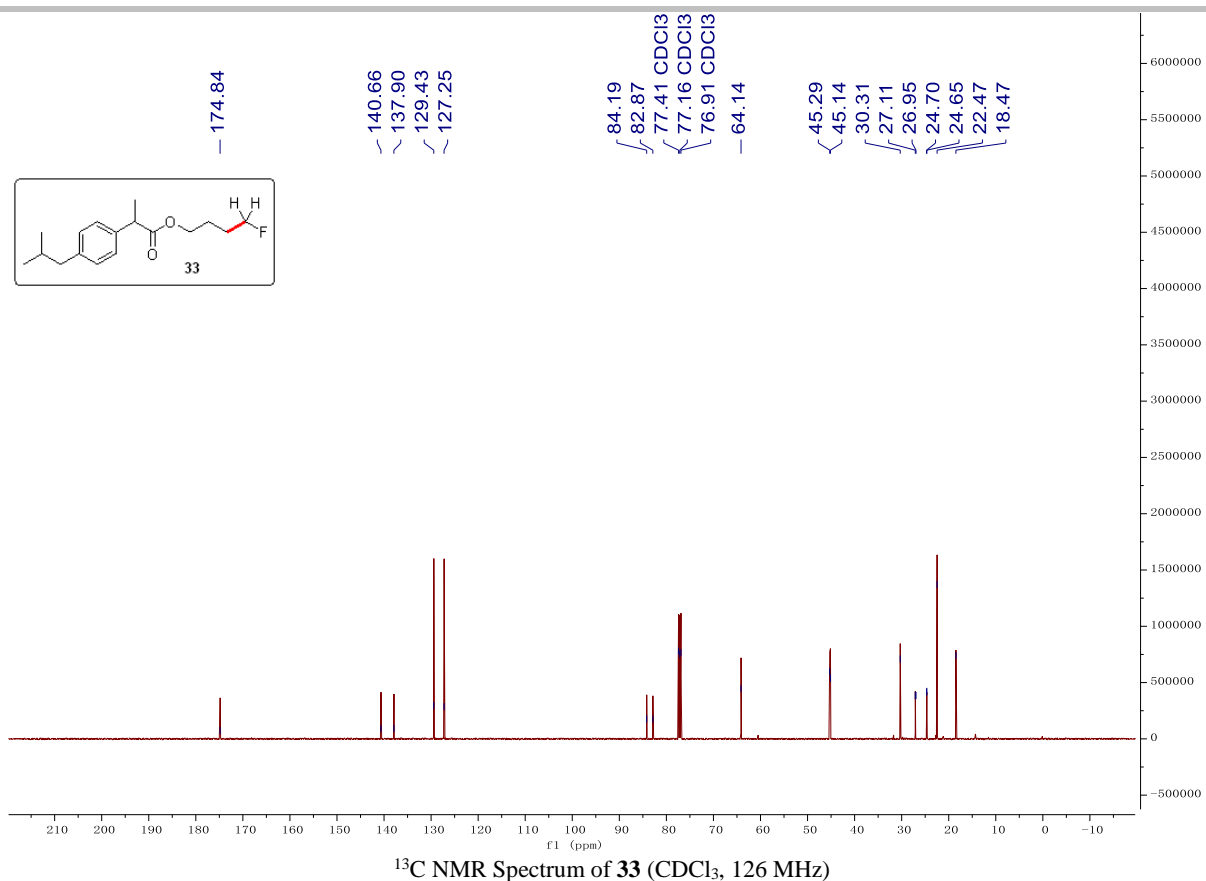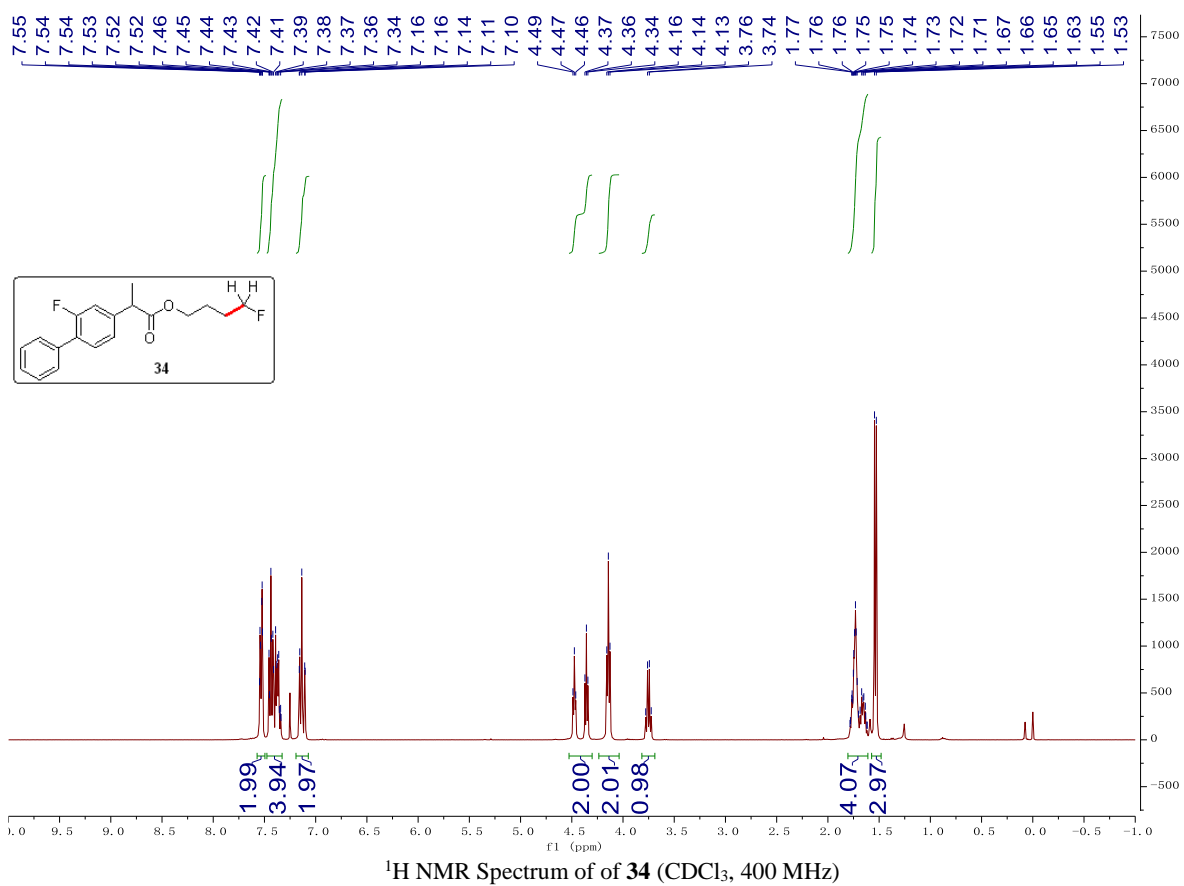

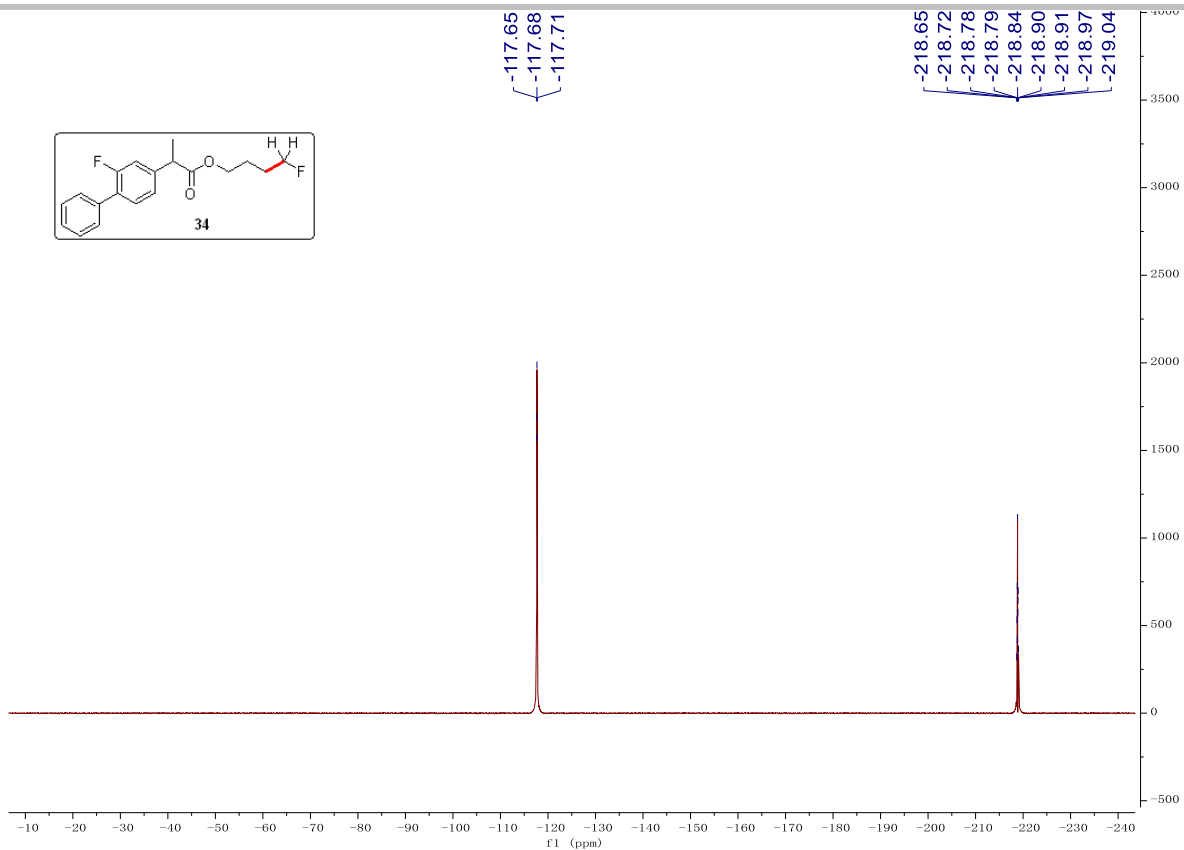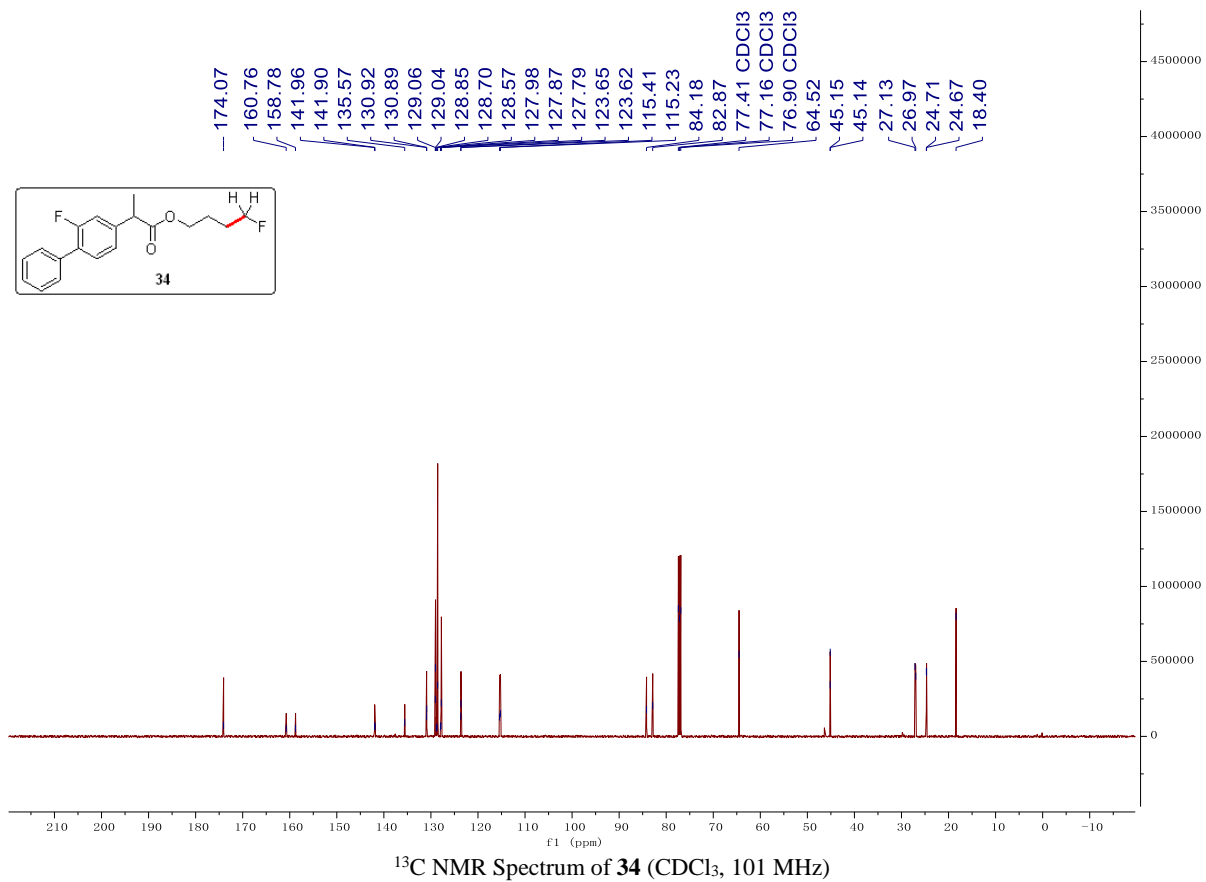

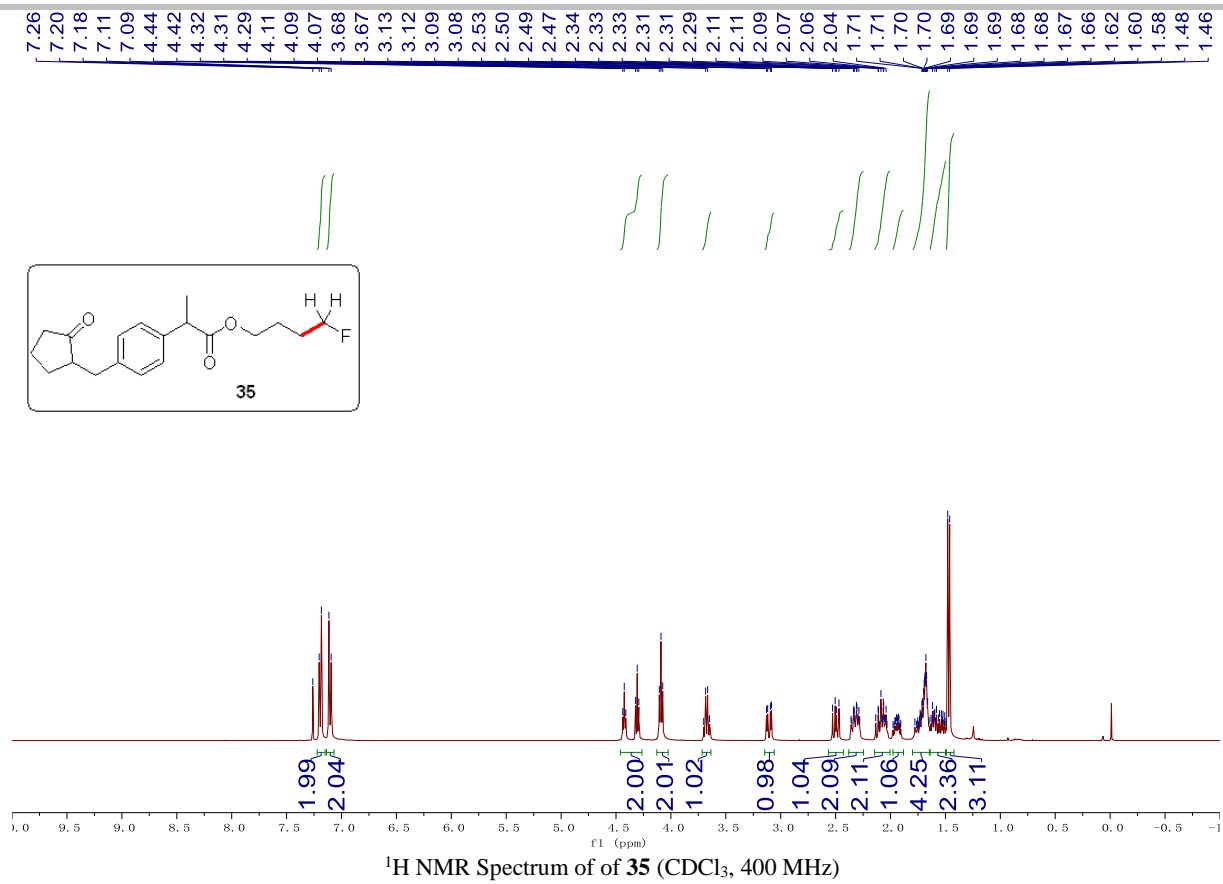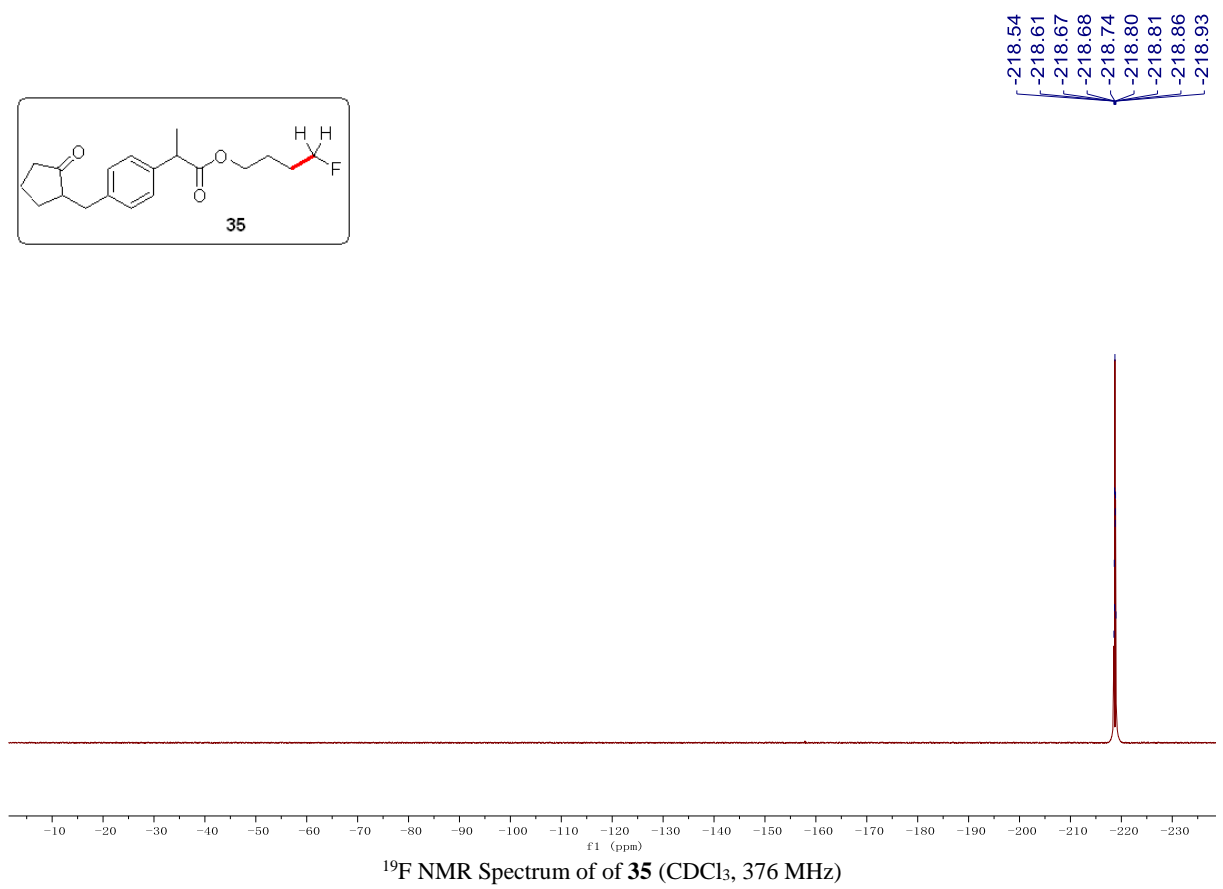



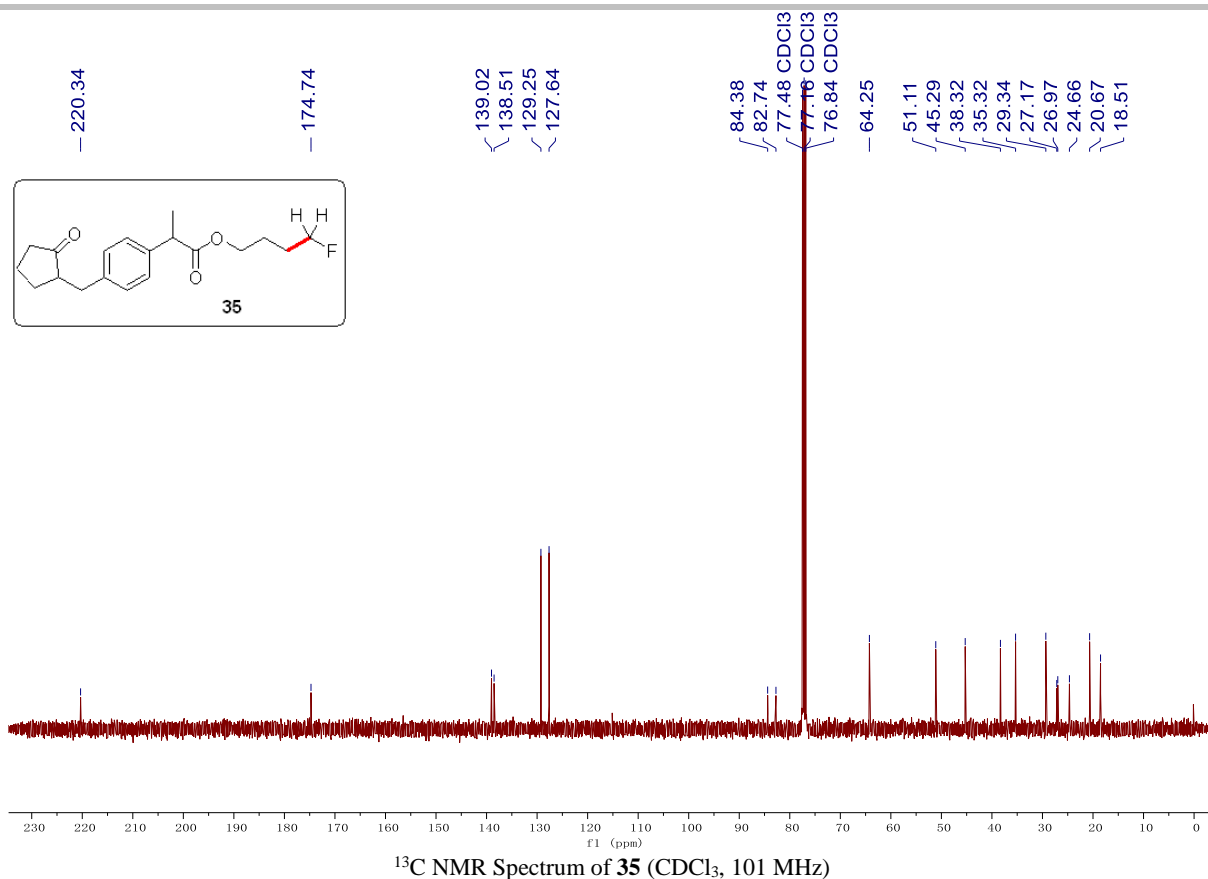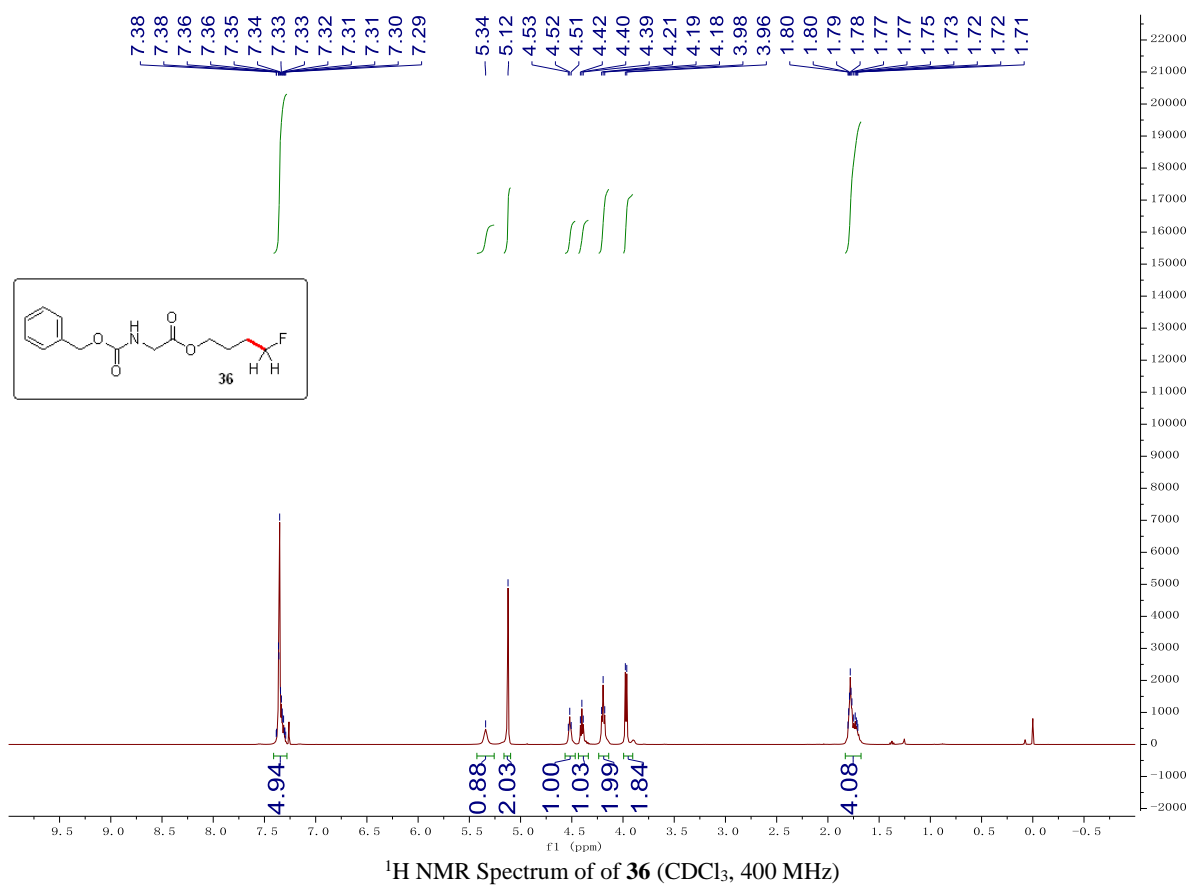

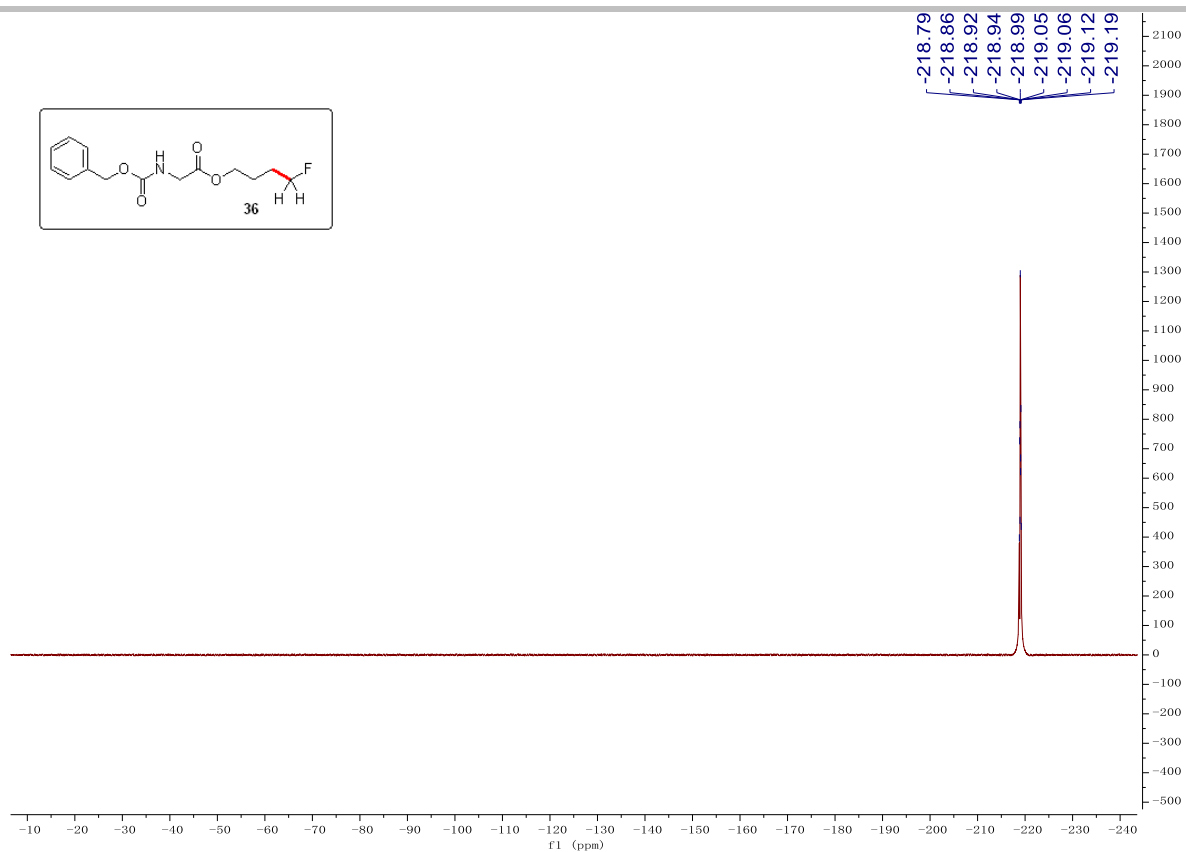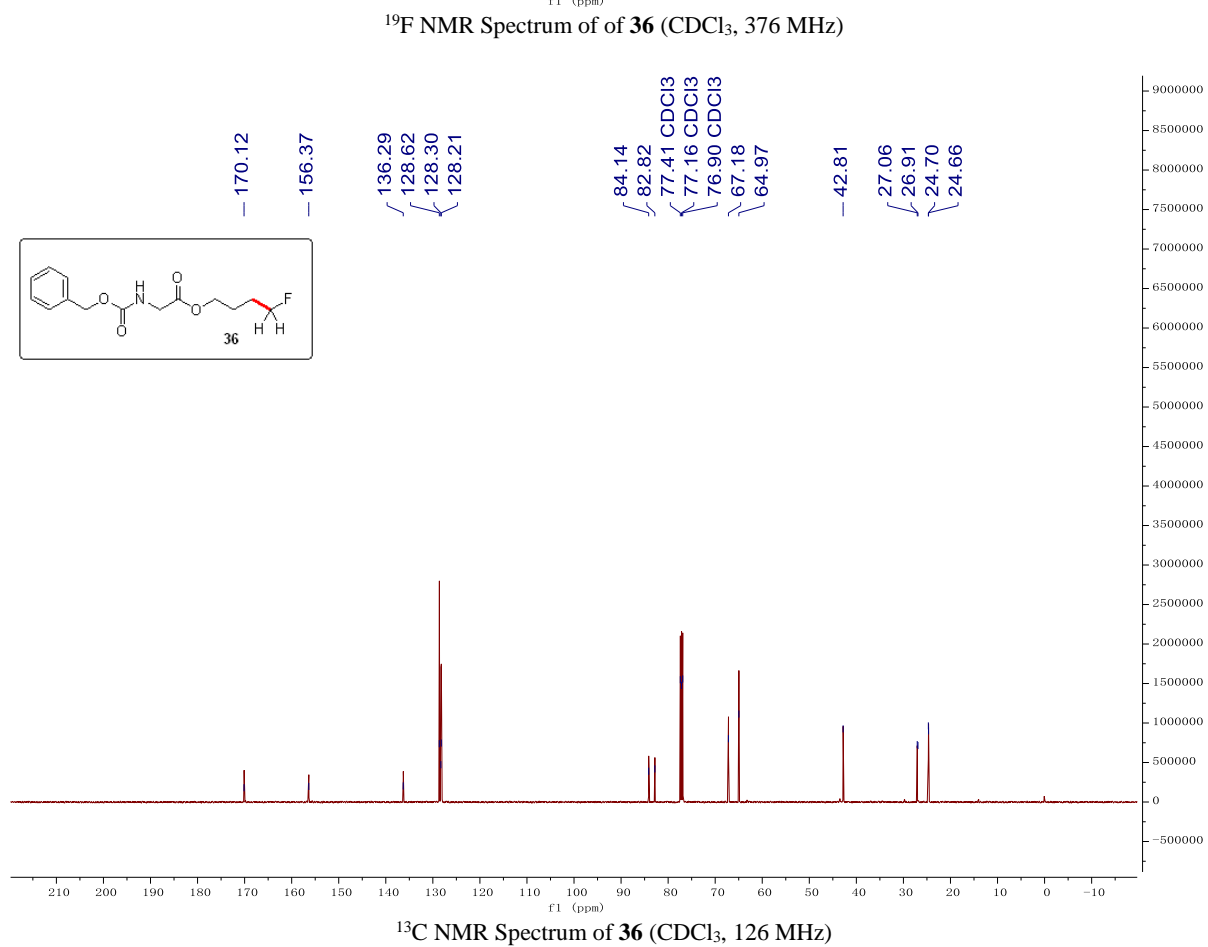

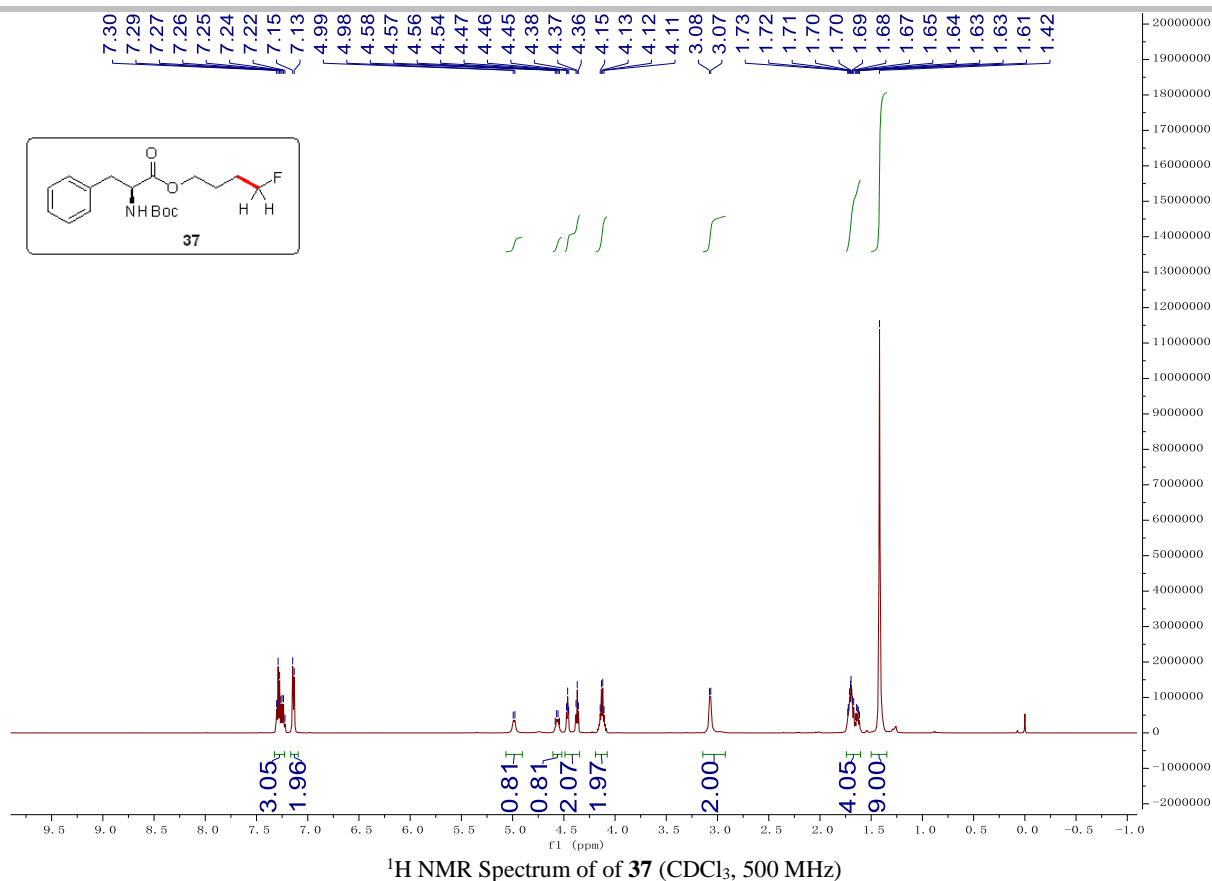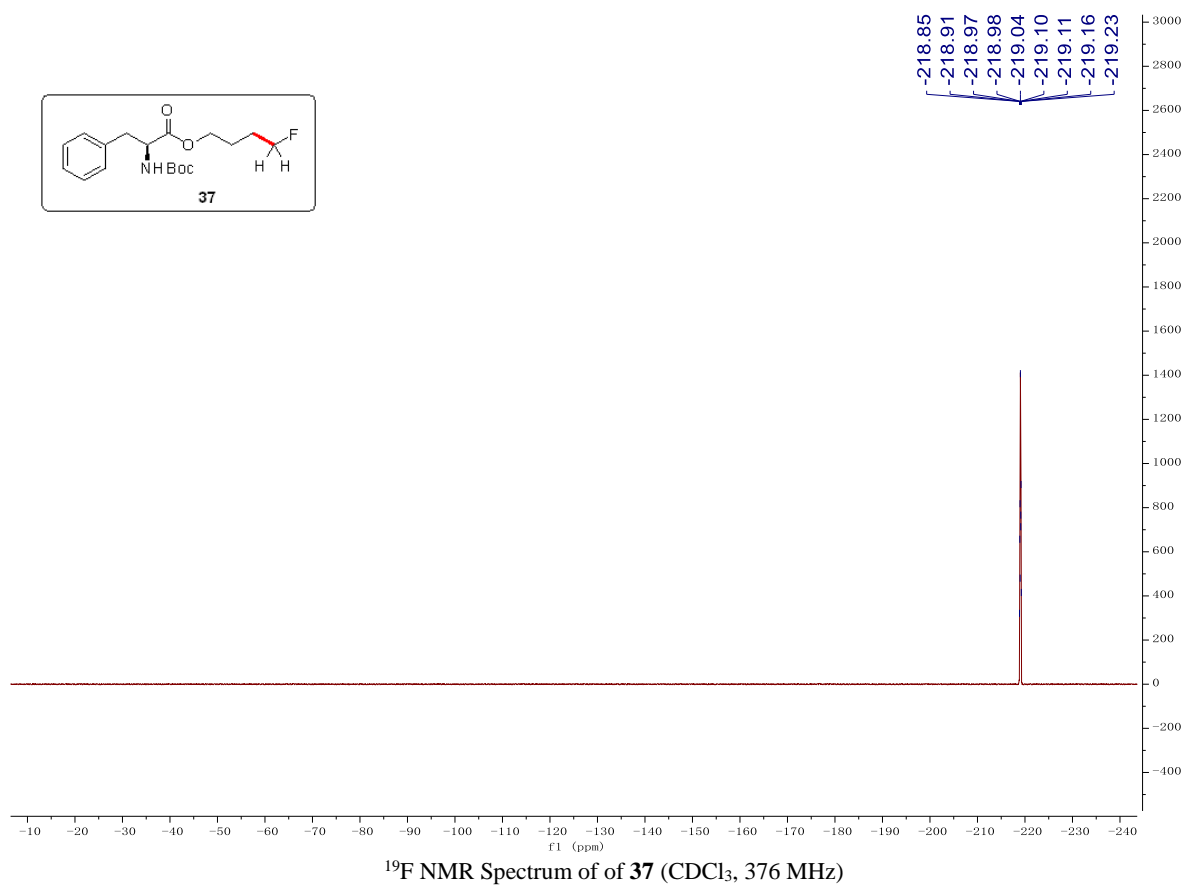

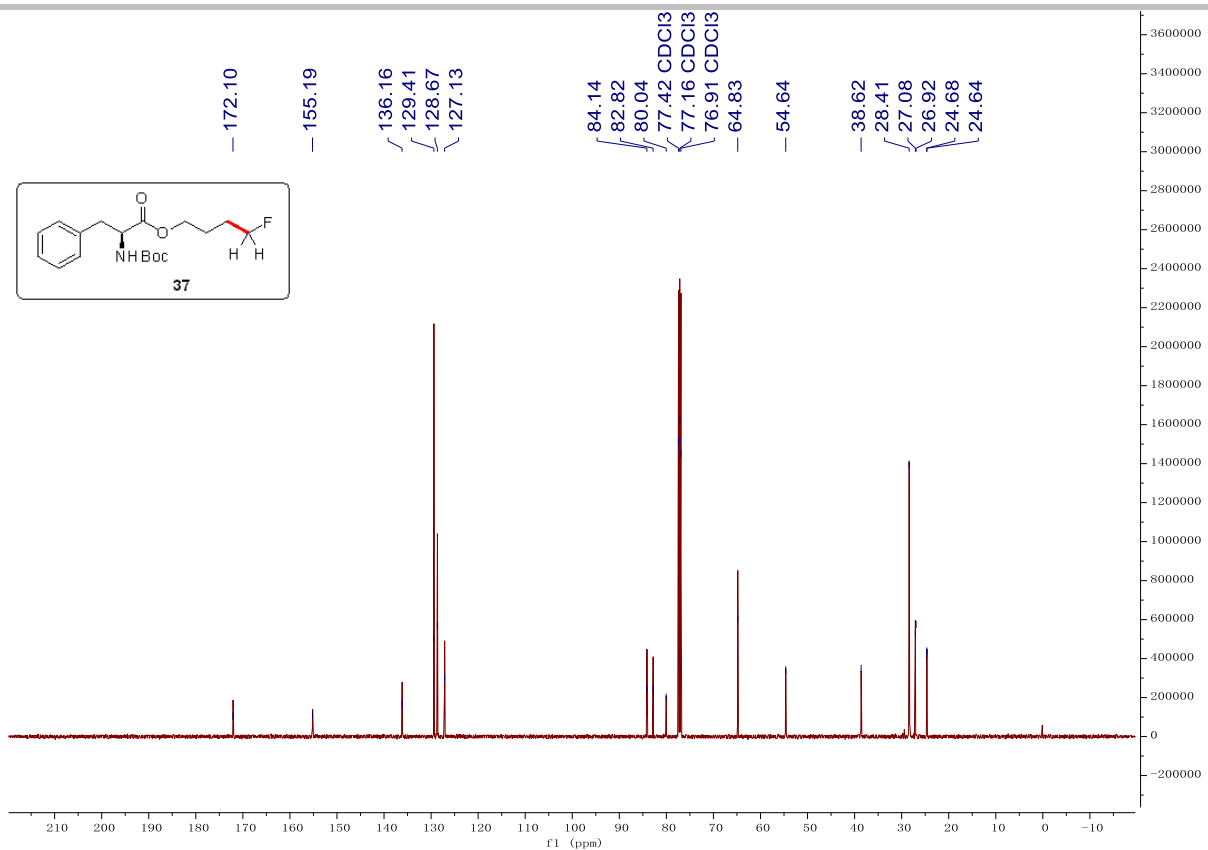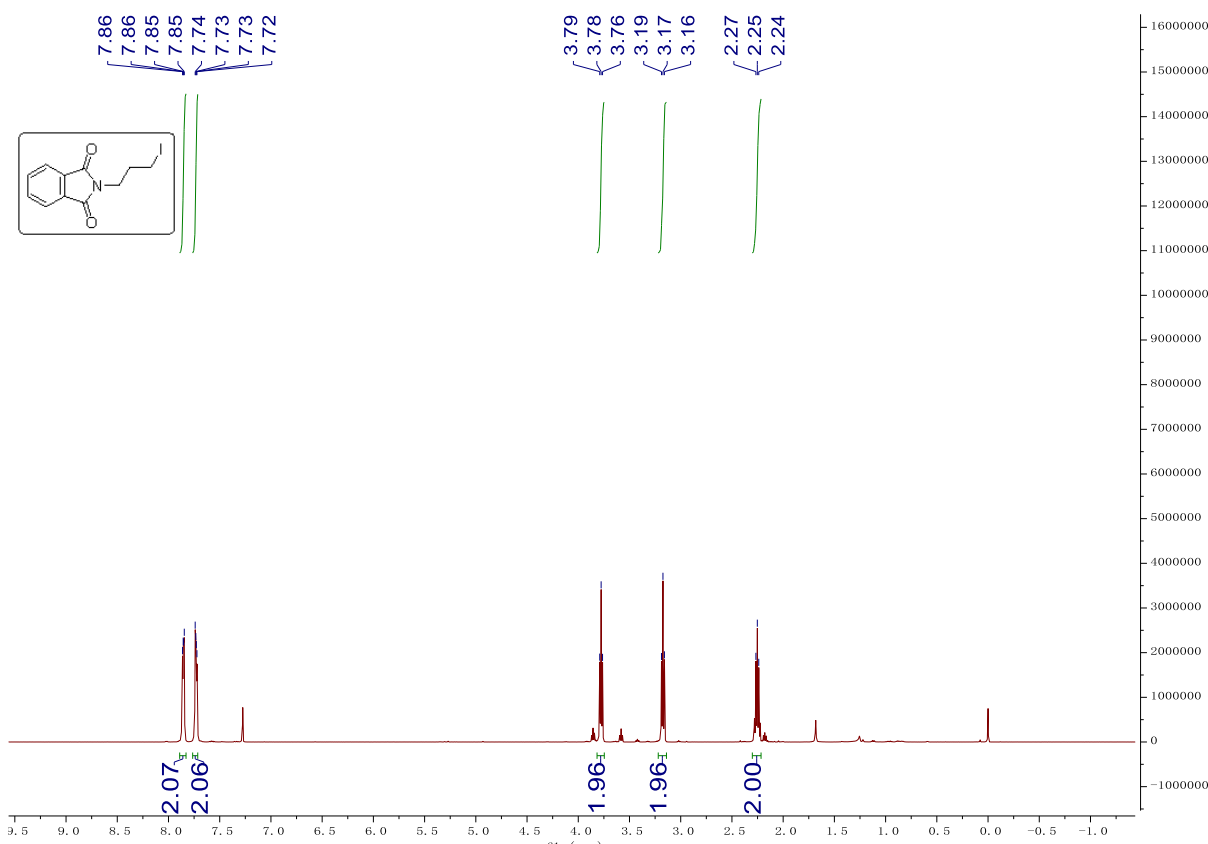

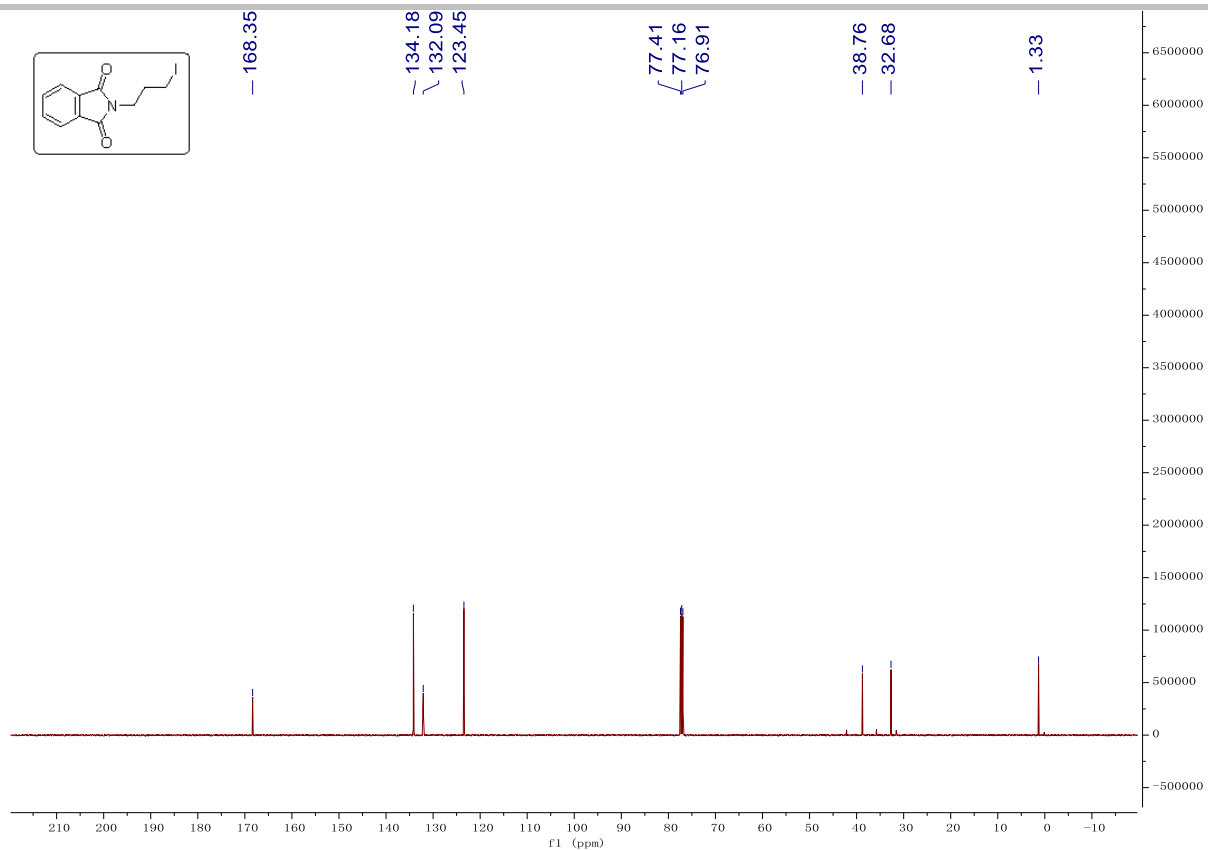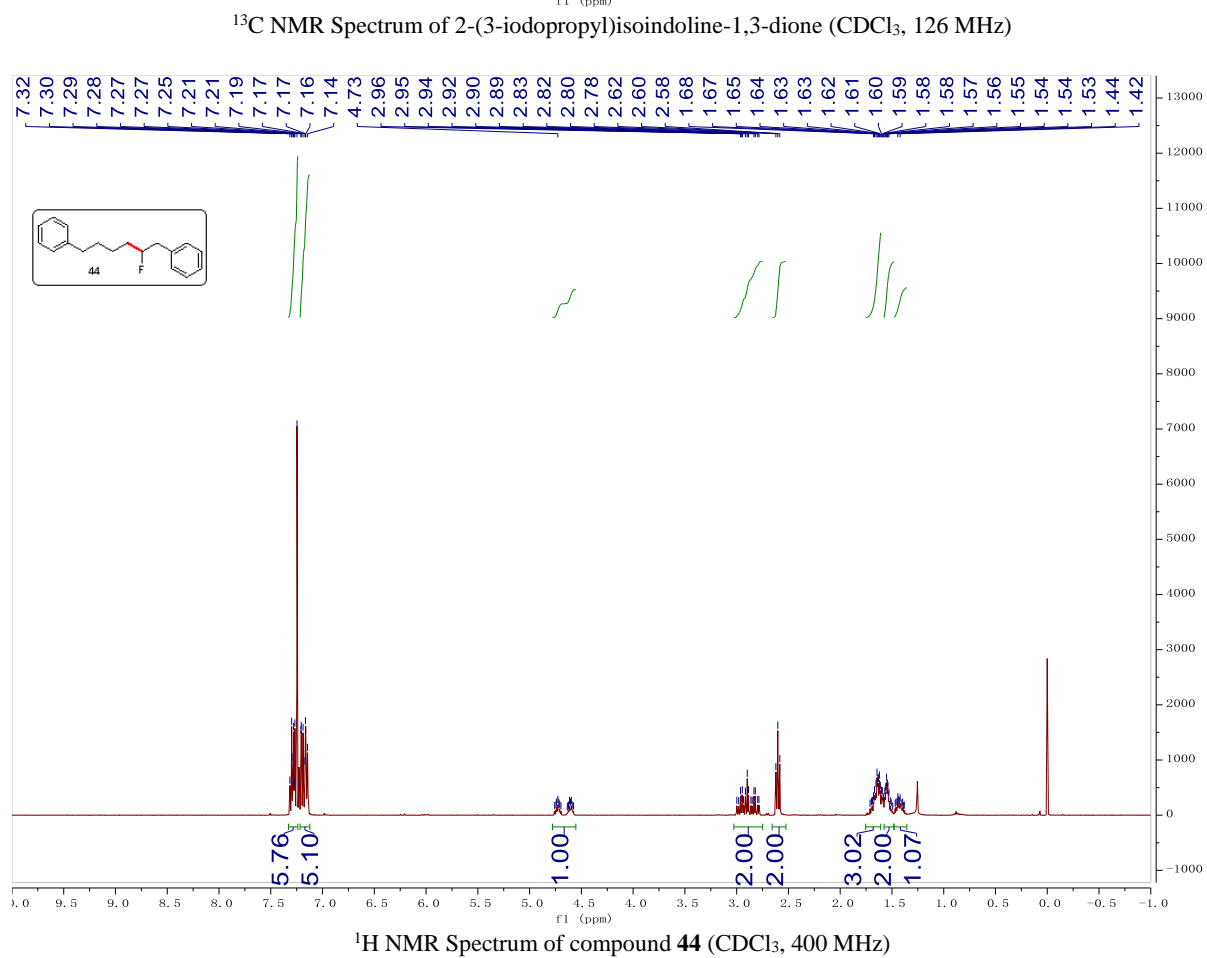

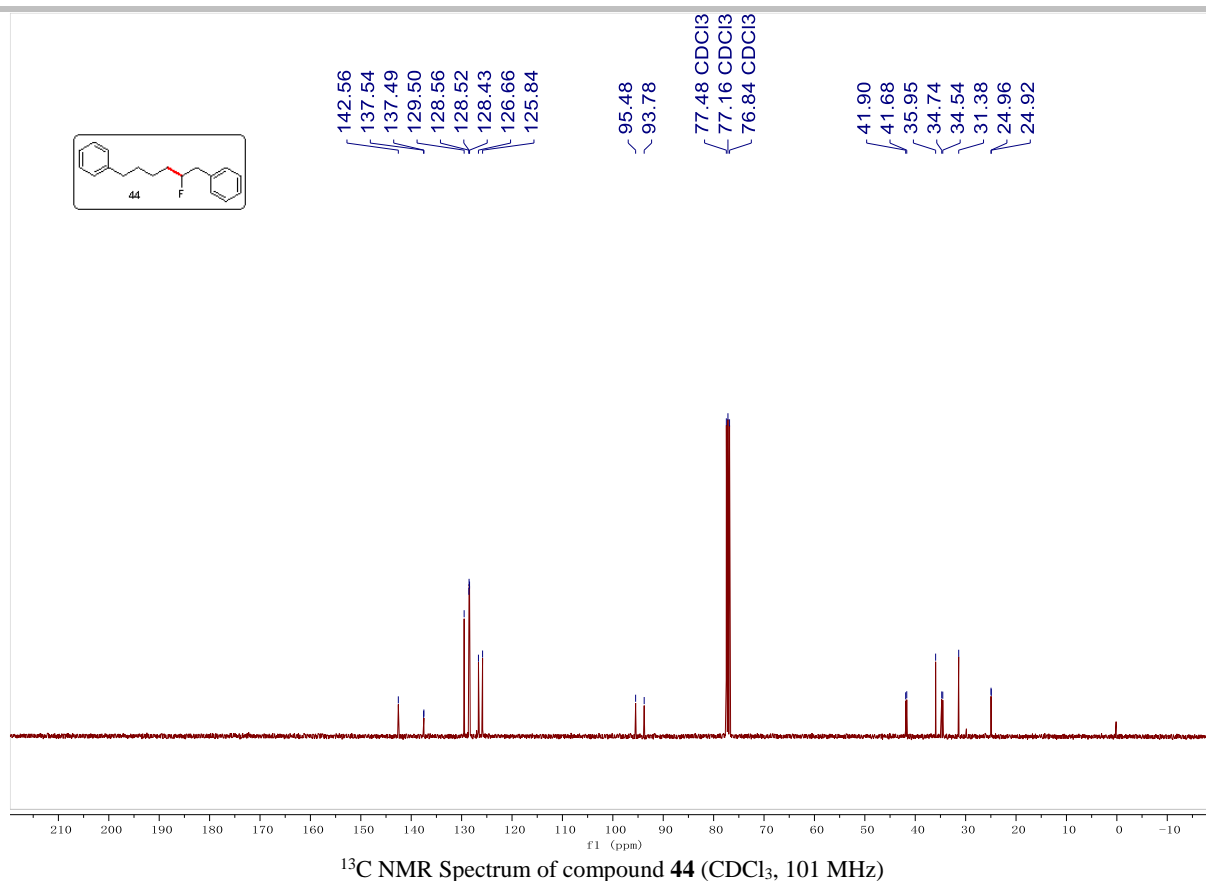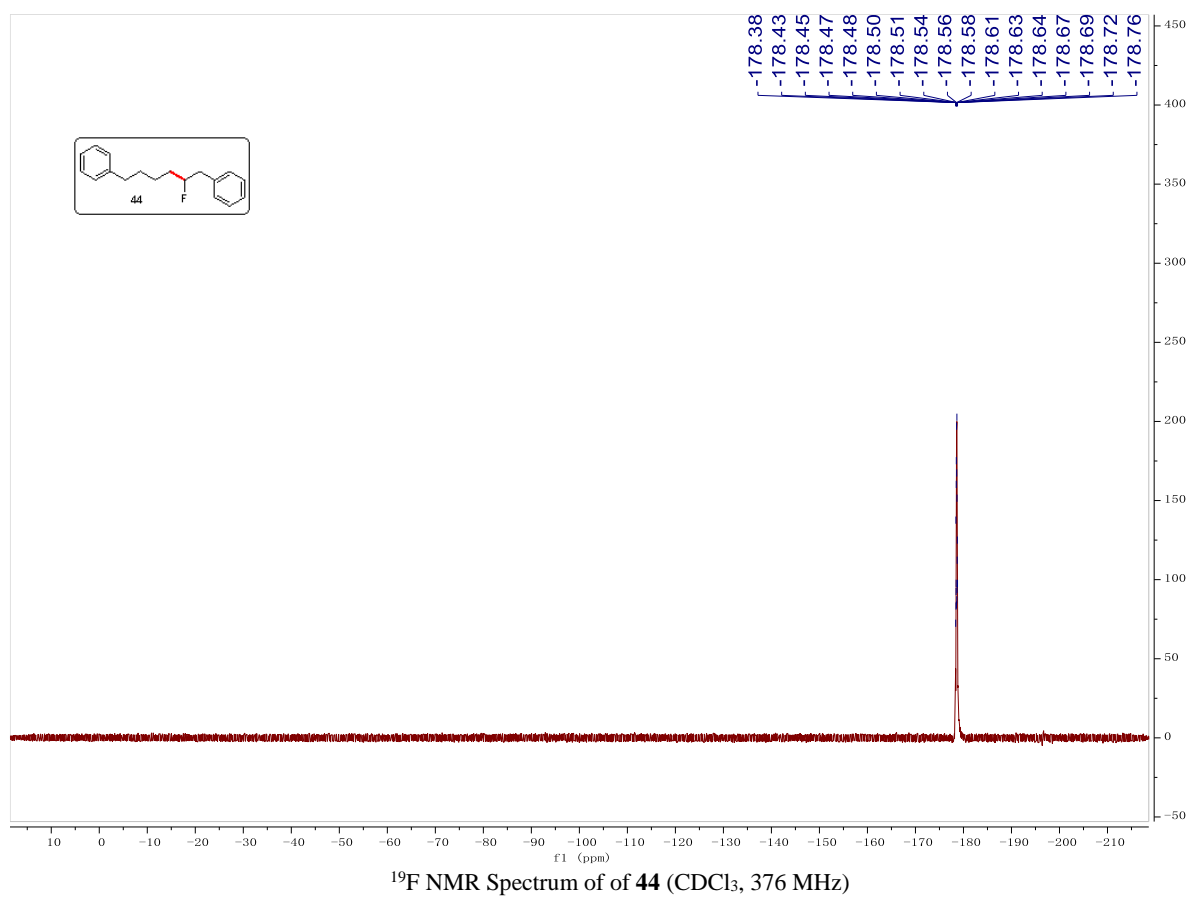

Supplement: d1cc02837e1.pdf [file d1cc02837e1.pdf]
